# Supplementary material for: A faecal microbiota signature with high specificity for pancreatic cancer
Source: PubMed Central journal article supplement (PMC9185815; doi:10.1136/gutjnl-2021-324755), 2022-03-08
Supplement: gutjnl-2021-324755supp002.pdf [file gutjnl-2021-324755supp002.pdf]

Supplementary Table S1: ES Cohort Details

| sample_alias      | experiment_name | experiment_type | instrument_model    | replicate | insert_size | read_length | read_count | environment_material  | timepoint |
|-------------------|-----------------|-----------------|---------------------|-----------|-------------|-------------|------------|-----------------------|-----------|
| MMPC-3103102-ST-0 | MMPC35551931ST  | metagenome      | Illumina HiSeq 4000 | 0         | 350         | 150         | 11417135   | feces [ENVO:00002003] | 0         |
| MMPC-3103103-ST-0 | MMPC41376408ST  | metagenome      | Illumina HiSeq 4000 | 0         | 350         | 150         | 22532306   | feces [ENVO:00002003] | 0         |
| MMPC-3103106-ST-0 | MMPC59659730ST  | metagenome      | Illumina HiSeq 4000 | 0         | 350         | 150         | 22296806   | feces [ENVO:00002003] | 0         |
| MMPC-3103107-ST-0 | MMPC96048560ST  | metagenome      | Illumina HiSeq 4000 | 0         | 350         | 150         | 15812641   | feces [ENVO:00002003] | 0         |
| MMPC-3103107-ST-0 | MMPW24306397ST  | metagenome      | Illumina HiSeq 4000 | 0         | 350         | 150         | 562381156  | feces [ENVO:00002003] | 0         |
| MMPC-3103108-ST-0 | MMPC42296680ST  | metagenome      | Illumina HiSeq 4000 | 0         | 350         | 150         | 12998378   | feces [ENVO:00002003] | 0         |
| MMPC-3103109-ST-0 | MMPC49776422ST  | metagenome      | Illumina HiSeq 4000 | 0         | 350         | 150         | 24362813   | feces [ENVO:00002003] | 0         |
| MMPC-3103109-ST-0 | MMPW76972986ST  | metagenome      | Illumina HiSeq 4000 | 0         | 350         | 150         | 597499733  | feces [ENVO:00002003] | 0         |
| MMPC-3103111-ST-0 | MMPC19228810ST  | metagenome      | Illumina HiSeq 4000 | 0         | 350         | 150         | 15320194   | feces [ENVO:00002003] | 0         |
| MMPC-3103112-ST-0 | MMPW28983031ST  | metagenome      | Illumina HiSeq 4000 | 0         | 350         | 150         | 514088417  | feces [ENVO:00002003] | 0         |
| MMPC-3103112-ST-0 | MMPC45272194ST  | metagenome      | Illumina HiSeq 4000 | 0         | 350         | 150         | 19734216   | feces [ENVO:00002003] | 0         |
| MMPC-3103114-ST-0 | MMPC36793964ST  | metagenome      | Illumina HiSeq 4000 | 0         | 350         | 150         | 12388494   | feces [ENVO:00002003] | 0         |
| MMPC-3103115-ST-0 | MMPC92286162ST  | metagenome      | Illumina HiSeq 4000 | 0         | 350         | 150         | 12858226   | feces [ENVO:00002003] | 0         |
| MMPC-3103116-ST-0 | MMPC23673679ST  | metagenome      | Illumina HiSeq 4000 | 0         | 350         | 150         | 13475213   | feces [ENVO:00002003] | 0         |
| MMPC-3103116-ST-0 | MMPW31043630ST  | metagenome      | Illumina HiSeq 4000 | 0         | 350         | 150         | 540784922  | feces [ENVO:00002003] | 0         |
| MMPC-3103117-ST-0 | MMPW39199901ST  | metagenome      | Illumina HiSeq 4000 | 0         | 350         | 150         | 551836962  | feces [ENVO:00002003] | 0         |
| MMPC-3103117-ST-0 | MMPC53747560ST  | metagenome      | Illumina HiSeq 4000 | 0         | 350         | 150         | 19414746   | feces [ENVO:00002003] | 0         |
| MMPC-3103118-ST-0 | MMPC76278395ST  | metagenome      | Illumina HiSeq 4000 | 0         | 350         | 150         | 23770034   | feces [ENVO:00002003] | 0         |
| MMPC-3103119-ST-0 | MMPC92856474ST  | metagenome      | Illumina HiSeq 4000 | 0         | 350         | 150         | 24862116   | feces [ENVO:00002003] | 0         |
| MMPC-3103120-ST-0 | MMPC41385323ST  | metagenome      | Illumina HiSeq 4000 | 0         | 350         | 150         | 17450417   | feces [ENVO:00002003] | 0         |
| MMPC-3103121-ST-0 | MMPC12800445ST  | metagenome      | Illumina HiSeq 4000 | 0         | 350         | 150         | 20514446   | feces [ENVO:00002003] | 0         |
| MMPC-3103124-ST-0 | MMPC10431544ST  | metagenome      | Illumina HiSeq 4000 | 0         | 350         | 150         | 34540047   | feces [ENVO:00002003] | 0         |
| MMPC-3103124-ST-0 | MMPW97100755ST  | metagenome      | Illumina HiSeq 4000 | 0         | 350         | 150         | 616136180  | feces [ENVO:00002003] | 0         |
| MMPC-3103125-ST-0 | MMPC29682684ST  | metagenome      | Illumina HiSeq 4000 | 0         | 350         | 150         | 29767506   | feces [ENVO:00002003] | 0         |
| MMPC-3103126-ST-0 | MMPC51115713ST  | metagenome      | Illumina HiSeq 4000 | 0         | 350         | 150         | 38401273   | feces [ENVO:00002003] | 0         |
| MMPC-3103127-ST-0 | MMPC99615156ST  | metagenome      | Illumina HiSeq 4000 | 0         | 350         | 150         | 11813347   | feces [ENVO:00002003] | 0         |
| MMPC-3103129-ST-0 | MMPC45114789ST  | metagenome      | Illumina HiSeq 4000 | 0         | 350         | 150         | 43078526   | feces [ENVO:00002003] | 0         |
| MMPC-3103202-ST-0 | MMPC52359973ST  | metagenome      | Illumina HiSeq 4000 | 0         | 350         | 150         | 18061157   | feces [ENVO:00002003] | 0         |
| MMPC-3103203-ST-0 | MMPW21548424ST  | metagenome      | Illumina HiSeq 4000 | 0         | 350         | 150         | 542893761  | feces [ENVO:00002003] | 0         |
| MMPC-3103203-ST-0 | MMPC73667956ST  | metagenome      | Illumina HiSeq 4000 | 0         | 350         | 150         | 18138792   | feces [ENVO:00002003] | 0         |
| MMPC-3103206-ST-0 | MMPC47668641ST  | metagenome      | Illumina HiSeq 4000 | 0         | 350         | 150         | 28939256   | feces [ENVO:00002003] | 0         |
| MMPC-3103207-ST-0 | MMPC69211422ST  | metagenome      | Illumina HiSeq 4000 | 0         | 350         | 150         | 19540088   | feces [ENVO:00002003] | 0         |
| MMPC-3103208-ST-0 | MMPC78378767ST  | metagenome      | Illumina HiSeq 4000 | 0         | 350         | 150         | 18782020   | feces [ENVO:00002003] | 0         |
| MMPC-3103209-ST-0 | MMPC75057555ST  | metagenome      | Illumina HiSeq 4000 | 0         | 350         | 150         | 41063683   | feces [ENVO:00002003] | 0         |
| MMPC-3103211-ST-0 | MMPC63233635ST  | metagenome      | Illumina HiSeq 4000 | 0         | 350         | 150         | 34235593   | feces [ENVO:00002003] | 0         |
| MMPC-3103211-ST-0 | MMPW67722444ST  | metagenome      | Illumina HiSeq 4000 | 0         | 350         | 150         | 577789449  | feces [ENVO:00002003] | 0         |
| MMPC-3103212-ST-0 | MMPC25016485ST  | metagenome      | Illumina HiSeq 4000 | 0         | 350         | 150         | 13684247   | feces [ENVO:00002003] | 0         |
| MMPC-3103214-ST-0 | MMPC82779175ST  | metagenome      | Illumina HiSeq 4000 | 0         | 350         | 150         | 15530149   | feces [ENVO:00002003] | 0         |
| MMPC-3103215-ST-0 | MMPC64434180ST  | metagenome      | Illumina HiSeq 4000 | 0         | 350         | 150         | 28178046   | feces [ENVO:00002003] | 0         |
| MMPC-3103216-ST-0 | MMPC37499694ST  | metagenome      | Illumina HiSeq 4000 | 0         | 350         | 150         | 35725071   | feces [ENVO:00002003] | 0         |
| MMPC-3103217-ST-0 | MMPC59151585ST  | metagenome      | Illumina HiSeq 4000 | 0         | 350         | 150         | 47396825   | feces [ENVO:00002003] | 0         |
| MMPC-3103218-ST-0 | MMPC12849395ST  | metagenome      | Illumina HiSeq 4000 | 0         | 350         | 150         | 48769925   | feces [ENVO:00002003] | 0         |
| MMPC-3103219-ST-0 | MMPC96275284ST  | metagenome      | Illumina HiSeq 4000 | 0         | 350         | 150         | 21659974   | feces [ENVO:00002003] | 0         |
| MMPC-3103220-ST-0 | MMPC32834082ST  | metagenome      | Illumina HiSeq 4000 | 0         | 350         | 150         | 17111873   | feces [ENVO:00002003] | 0         |
| MMPC-3103221-ST-0 | MMPC69837834ST  | metagenome      | Illumina HiSeq 4000 | 0         | 350         | 150         | 9569359    | feces [ENVO:00002003] | 0         |
| MMPC-3103223-ST-0 | MMPC36232351ST  | metagenome      | Illumina HiSeq 4000 | 0         | 350         | 150         | 59219214   | feces [ENVO:00002003] | 0         |
| MMPC-3103224-ST-0 | MMPC21449543ST  | metagenome      | Illumina HiSeq 4000 | 0         | 350         | 150         | 31704480   | feces [ENVO:00002003] | 0         |
| MMPC-3103225-ST-0 | MMPC63481302ST  | metagenome      | Illumina HiSeq 4000 | 0         | 350         | 150         | 38774804   | feces [ENVO:00002003] | 0         |
| MMPC-3103226-ST-0 | MMPC22175846ST  | metagenome      | Illumina HiSeq 4000 | 0         | 350         | 150         | 44695903   | feces [ENVO:00002003] | 0         |
| MMPC-3103227-ST-0 | MMPC17251241ST  | metagenome      | Illumina HiSeq 4000 | 0         | 350         | 150         | 44644402   | feces [ENVO:00002003] | 0         |
| MMPC-3103228-ST-0 | MMPC16651671ST  | metagenome      | Illumina HiSeq 4000 | 0         | 350         | 150         | 45156079   | feces [ENVO:00002003] | 0         |
| MMPC-3103229-ST-0 | MMPC59362655ST  | metagenome      | Illumina HiSeq 4000 | 0         | 350         | 150         | 42996294   | feces [ENVO:00002003] | 0         |
| MMPC-3103302-ST-0 | MMPC88343716ST  | metagenome      | Illumina HiSeq 4000 | 0         | 350         | 150         | 26171451   | feces [ENVO:00002003] | 0         |
| MMPC-3103303-ST-0 | MMPC67317135ST  | metagenome      | Illumina HiSeq 4000 | 0         | 350         | 150         | 41987974   | feces [ENVO:00002003] | 0         |
| MMPC-3103306-ST-0 | MMPC75070829ST  | metagenome      | Illumina HiSeq 4000 | 0         | 350         | 150         | 46219614   | feces [ENVO:00002003] | 0         |
| MMPC-3103307-ST-0 | MMPC93358150ST  | metagenome      | Illumina HiSeq 4000 | 0         | 350         | 150         | 41266766   | feces [ENVO:00002003] | 0         |
| MMPC-3103308-ST-0 | MMPC95108539ST  | metagenome      | Illumina HiSeq 4000 | 0         | 350         | 150         | 51296849   | feces [ENVO:00002003] | 0         |
| MMPC-3103309-ST-0 | MMPC68695449ST  | metagenome      | Illumina HiSeq 4000 | 0         | 350         | 150         | 16713617   | feces [ENVO:00002003] | 0         |
| MMPC-3103311-ST-0 | MMPC79169108ST  | metagenome      | Illumina HiSeq 4000 | 0         | 350         | 150         | 29917194   | feces [ENVO:00002003] | 0         |
| MMPC-3103312-ST-0 | MMPC95991337ST  | metagenome      | Illumina HiSeq 4000 | 0         | 350         | 150         | 40108122   | feces [ENVO:00002003] | 0         |
| MMPC-3103314-ST-0 | MMPC82784238ST  | metagenome      | Illumina HiSeq 4000 | 0         | 350         | 150         | 49888210   | feces [ENVO:00002003] | 0         |
| MMPC-3103315-ST-0 | MMPC35131016ST  | metagenome      | Illumina HiSeq 4000 | 0         | 350         | 150         | 39883458   | feces [ENVO:00002003] | 0         |
| MMPC-3103316-ST-0 | MMPC52740890ST  | metagenome      | Illumina HiSeq 4000 | 0         | 350         | 150         | 33343541   | feces [ENVO:00002003] | 0         |
| MMPC-3103317-ST-0 | MMPC48152369ST  | metagenome      | Illumina HiSeq 4000 | 0         | 350         | 150         | 48281105   | feces [ENVO:00002003] | 0         |
| MMPC-3103318-ST-0 | MMPC93983194ST  | metagenome      | Illumina HiSeq 4000 | 0         | 350         | 150         | 38098451   | feces [ENVO:00002003] | 0         |
| MMPC-3103319-ST-0 | MMPC11113549ST  | metagenome      | Illumina HiSeq 4000 | 0         | 350         | 150         | 40759382   | feces [ENVO:00002003] | 0         |
| MMPC-3103319-ST-0 | MMPC50507232ST  | metagenome      | Illumina HiSeq 4000 | 0         | 350         | 150         | 48108766   | feces [ENVO:00002003] | 0         |
| MMPC-3103320-ST-0 | MMPC77686266ST  | metagenome      | Illumina HiSeq 4000 | 0         | 350         | 150         | 41439816   | feces [ENVO:00002003] | 0         |
| MMPC-3103321-ST-0 | MMPC56485647ST  | metagenome      | Illumina HiSeq 4000 | 0         | 350         | 150         | 55325188   | feces [ENVO:00002003] | 0         |
| MMPC-3103324-ST-0 | MMPC71307280ST  | metagenome      | Illumina HiSeq 4000 | 0         | 350         | 150         | 28830324   | feces [ENVO:00002003] | 0         |
| MMPC-3103325-ST-0 | MMPC99058548ST  | metagenome      | Illumina HiSeq 4000 | 0         | 350         | 150         | 31073638   | feces [ENVO:00002003] | 0         |
| MMPC-3103326-ST-0 | MMPC16382508ST  | metagenome      | Illumina HiSeq 4000 | 0         | 350         | 150         | 34469441   | feces [ENVO:00002003] | 0         |
| MMPC-3103327-ST-0 | MMPC23660755ST  | metagenome      | Illumina HiSeq 4000 | 0         | 350         | 150         | 41089562   | feces [ENVO:00002003] | 0         |
| MMPC-3103329-ST-0 | MMPC29268878ST  | metagenome      | Illumina HiSeq 4000 | 0         | 350         | 150         | 50747715   | feces [ENVO:00002003] | 0         |
| MMPC-3103330-ST-0 | MMPC96910089ST  | metagenome      | Illumina HiSeq 4000 | 0         | 350         | 150         | 15562457   | feces [ENVO:00002003] | 0         |
| MMPC-3109101-ST-0 | MMPC14221565ST  | metagenome      | Illumina HiSeq 4000 | 0         | 350         | 150         | 74174779   | feces [ENVO:00002003] | 0         |
| MMPC-3109101-ST-0 | MMPW29397139ST  | metagenome      | Illumina HiSeq 4000 | 0         | 350         | 150         | 468087742  | feces [ENVO:00002003] | 0         |
| MMPC-3109102-ST-0 | MMPC20689138ST  | metagenome      | Illumina HiSeq 4000 | 0         | 350         | 150         | 42313248   | feces [ENVO:00002003] | 0         |
| MMPC-3109103-ST-0 | MMPW82409611ST  | metagenome      | Illumina HiSeq 4000 | 0         | 350         | 150         | 448012729  | feces [ENVO:00002003] | 0         |
| MMPC-3109103-ST-0 | MMPC61634104ST  | metagenome      | Illumina HiSeq 4000 | 0         | 350         | 150         | 28553975   | feces [ENVO:00002003] | 0         |
| MMPC-3109104-ST-0 | MMPC53642802ST  | metagenome      | Illumina HiSeq 4000 | 0         | 350         | 150         | 12302431   | feces [ENVO:00002003] | 0         |
| MMPC-3109105-ST-0 | MMPC83679680ST  | metagenome      | Illumina HiSeq 4000 | 0         | 350         | 150         | 18019953   | feces [ENVO:00002003] | 0         |
| MMPC-3109106-ST-0 | MMPC21059026ST  | metagenome      | Illumina HiSeq 4000 | 0         | 350         | 150         | 15660594   | feces [ENVO:00002003] | 0         |
| MMPC-3109108-ST-0 | MMPC29596062ST  | metagenome      | Illumina HiSeq 4000 | 0         | 350         | 150         | 15449487   | feces [ENVO:00002003] | 0         |
| MMPC-3109109-ST-0 | MMPC79962166ST  | metagenome      | Illumina HiSeq 4000 | 0         | 350         | 150         | 45702011   | feces [ENVO:00002003] | 0         |
| MMPC-3109110-ST-0 | MMPC84979047ST  | metagenome      | Illumina HiSeq 4000 | 0         | 350         | 150         | 51915806   | feces [ENVO:00002003] | 0         |
| MMPC-3109111-ST-0 | MMPC54944306ST  | metagenome      | Illumina HiSeq 4000 | 0         | 350         | 150         | 9093837    | feces [ENVO:00002003] | 0         |
| MMPC-3109112-ST-0 | MMPC36137610ST  | metagenome      | Illumina HiSeq 4000 | 0         | 350         | 150         | 11591475   | feces [ENVO:00002003] | 0         |

|                   |                 |            |                     |   |     |     |           |                        |   |
|-------------------|-----------------|------------|---------------------|---|-----|-----|-----------|------------------------|---|
| MMPC-3109114-ST-0 | MMPC36075929ST  | metagenome | Illumina HiSeq 4000 | 0 | 350 | 150 | 29343109  | feces [ENVO:00002003]  | 0 |
| MMPC-3109115-ST-0 | MMPC40565253ST  | metagenome | Illumina HiSeq 4000 | 0 | 350 | 150 | 24643317  | feces [ENVO:00002003]  | 0 |
| MMPC-3109116-ST-0 | MMPC67417775ST  | metagenome | Illumina HiSeq 4000 | 0 | 350 | 150 | 45871936  | feces [ENVO:00002003]  | 0 |
| MMPC-3109117-ST-0 | MMPW14699153ST  | metagenome | Illumina HiSeq 4000 | 0 | 350 | 150 | 560238359 | feces [ENVO:00002003]  | 0 |
| MMPC-3109117-ST-0 | MMPC49013463ST  | metagenome | Illumina HiSeq 4000 | 0 | 350 | 150 | 23300387  | feces [ENVO:00002003]  | 0 |
| MMPC-3109118-ST-0 | MMPC65662501ST  | metagenome | Illumina HiSeq 4000 | 0 | 350 | 150 | 15601130  | feces [ENVO:00002003]  | 0 |
| MMPC-3109119-ST-0 | MMPC40914520ST  | metagenome | Illumina HiSeq 4000 | 0 | 350 | 150 | 22964094  | feces [ENVO:00002003]  | 0 |
| MMPC-3109120-ST-0 | MMPC47063504ST  | metagenome | Illumina HiSeq 4000 | 0 | 350 | 150 | 49317362  | feces [ENVO:00002003]  | 0 |
| MMPC-3109121-ST-0 | MMPC17245919ST  | metagenome | Illumina HiSeq 4000 | 0 | 350 | 150 | 16398595  | feces [ENVO:00002003]  | 0 |
| MMPC-3109123-ST-0 | MMPW92389414ST  | metagenome | Illumina HiSeq 4000 | 0 | 350 | 150 | 623483187 | feces [ENVO:00002003]  | 0 |
| MMPC-3109123-ST-0 | MMPC68480658ST  | metagenome | Illumina HiSeq 4000 | 0 | 350 | 150 | 13327091  | feces [ENVO:00002003]  | 0 |
| MMPC-3109124-ST-0 | MMPC19165288ST  | metagenome | Illumina HiSeq 4000 | 0 | 350 | 150 | 30229110  | feces [ENVO:00002003]  | 0 |
| MMPC-3109125-ST-0 | MMPC57469621ST  | metagenome | Illumina HiSeq 4000 | 0 | 350 | 150 | 39790710  | feces [ENVO:00002003]  | 0 |
| MMPC-3109126-ST-0 | MMPC79996713ST  | metagenome | Illumina HiSeq 4000 | 0 | 350 | 150 | 45709125  | feces [ENVO:00002003]  | 0 |
| MMPC-3109127-ST-0 | MMPC37043483ST  | metagenome | Illumina HiSeq 4000 | 0 | 350 | 150 | 7234175   | feces [ENVO:00002003]  | 0 |
| MMPC-3109128-ST-0 | MMPC81211466ST  | metagenome | Illumina HiSeq 4000 | 0 | 350 | 150 | 58854083  | feces [ENVO:00002003]  | 0 |
| MMPC-3109129-ST-0 | MMPC24594620ST  | metagenome | Illumina HiSeq 4000 | 0 | 350 | 150 | 76431268  | feces [ENVO:00002003]  | 0 |
| MMPC-3109130-ST-0 | MMPC96182596ST  | metagenome | Illumina HiSeq 4000 | 0 | 350 | 150 | 76577158  | feces [ENVO:00002003]  | 0 |
| MMPC-3109132-ST-0 | MMPC77094060ST  | metagenome | Illumina HiSeq 4000 | 0 | 350 | 150 | 36697241  | feces [ENVO:00002003]  | 0 |
| MMPC-3109134-ST-0 | MMPC19619725ST  | metagenome | Illumina HiSeq 4000 | 0 | 350 | 150 | 69280835  | feces [ENVO:00002003]  | 0 |
| MMPC-3109135-ST-0 | MMPC16706723ST  | metagenome | Illumina HiSeq 4000 | 0 | 350 | 150 | 32414314  | feces [ENVO:00002003]  | 0 |
| MMPC-3109136-ST-0 | MMPC97506376ST  | metagenome | Illumina HiSeq 4000 | 0 | 350 | 150 | 31971411  | feces [ENVO:00002003]  | 0 |
| MMPC-3109137-ST-0 | MMPC54830782ST  | metagenome | Illumina HiSeq 4000 | 0 | 350 | 150 | 38208164  | feces [ENVO:00002003]  | 0 |
| MMPC-3109138-ST-0 | MMPC91449240ST  | metagenome | Illumina HiSeq 4000 | 0 | 350 | 150 | 30254506  | feces [ENVO:00002003]  | 0 |
| MMPC-3109139-ST-0 | MMPC55161862ST  | metagenome | Illumina HiSeq 4000 | 0 | 350 | 150 | 43855433  | feces [ENVO:00002003]  | 0 |
| MMPC-3109140-ST-0 | MMPC83312436ST  | metagenome | Illumina HiSeq 4000 | 0 | 350 | 150 | 33084701  | feces [ENVO:00002003]  | 0 |
| MMPC-3109141-ST-0 | MMPC27779234ST  | metagenome | Illumina HiSeq 4000 | 0 | 350 | 150 | 44147402  | feces [ENVO:00002003]  | 0 |
| MMPC-3109201-ST-0 | MMPC56144240ST  | metagenome | Illumina HiSeq 4000 | 0 | 350 | 150 | 26869755  | feces [ENVO:00002003]  | 0 |
| MMPC-3109203-ST-0 | MMPC13726847ST  | metagenome | Illumina HiSeq 4000 | 0 | 350 | 150 | 21663895  | feces [ENVO:00002003]  | 0 |
| MMPC-3109204-ST-0 | MMPC22312907ST  | metagenome | Illumina HiSeq 4000 | 0 | 350 | 150 | 41893983  | feces [ENVO:00002003]  | 0 |
| MMPC-3109205-ST-0 | MMPC30948868ST  | metagenome | Illumina HiSeq 4000 | 0 | 350 | 150 | 21480386  | feces [ENVO:00002003]  | 0 |
| MMPC-3109206-ST-0 | MMPC30623640ST  | metagenome | Illumina HiSeq 4000 | 0 | 350 | 150 | 13694714  | feces [ENVO:00002003]  | 0 |
| MMPC-3109209-ST-0 | MMPC97173638ST  | metagenome | Illumina HiSeq 4000 | 0 | 350 | 150 | 19516074  | feces [ENVO:00002003]  | 0 |
| MMPC-3109210-ST-0 | MMPC21135377ST  | metagenome | Illumina HiSeq 4000 | 0 | 350 | 150 | 16258379  | feces [ENVO:00002003]  | 0 |
| MMPC-3109211-ST-0 | MMPC19217531ST  | metagenome | Illumina HiSeq 4000 | 0 | 350 | 150 | 53969453  | feces [ENVO:00002003]  | 0 |
| MMPC-3109212-ST-0 | MMPC94907966ST  | metagenome | Illumina HiSeq 4000 | 0 | 350 | 150 | 13649260  | feces [ENVO:00002003]  | 0 |
| MMPC-3109213-ST-0 | MMPC60840390ST  | metagenome | Illumina HiSeq 4000 | 0 | 350 | 150 | 13085767  | feces [ENVO:00002003]  | 0 |
| MMPC-3109215-ST-0 | MMPC37485778ST  | metagenome | Illumina HiSeq 4000 | 0 | 350 | 150 | 35733187  | feces [ENVO:00002003]  | 0 |
| MMPC-3109216-ST-0 | MMPC11119852ST  | metagenome | Illumina HiSeq 4000 | 0 | 350 | 150 | 14931356  | feces [ENVO:00002003]  | 0 |
| MMPC-3109217-ST-0 | MMPC34174031ST  | metagenome | Illumina HiSeq 4000 | 0 | 350 | 150 | 12765922  | feces [ENVO:00002003]  | 0 |
| MMPC-3109218-ST-0 | MMPC52379257ST  | metagenome | Illumina HiSeq 4000 | 0 | 350 | 150 | 50336511  | feces [ENVO:00002003]  | 0 |
| MMPC-3109219-ST-0 | MMPC63364113ST  | metagenome | Illumina HiSeq 4000 | 0 | 350 | 150 | 11273985  | feces [ENVO:00002003]  | 0 |
| MMPC-3109221-ST-0 | MMPC27749512ST  | metagenome | Illumina HiSeq 4000 | 0 | 350 | 150 | 22832202  | feces [ENVO:00002003]  | 0 |
| MMPC-3109222-ST-0 | MMPC44022333ST  | metagenome | Illumina HiSeq 4000 | 0 | 350 | 150 | 22174223  | feces [ENVO:00002003]  | 0 |
| MMPC-3109223-ST-0 | MMPW83144761ST  | metagenome | Illumina HiSeq 4000 | 0 | 350 | 150 | 623360223 | feces [ENVO:00002003]  | 0 |
| MMPC-3109223-ST-0 | MMPC43926327ST  | metagenome | Illumina HiSeq 4000 | 0 | 350 | 150 | 25244238  | feces [ENVO:00002003]  | 0 |
| MMPC-3109225-ST-0 | MMPC12345974ST  | metagenome | Illumina HiSeq 4000 | 0 | 350 | 150 | 85252767  | feces [ENVO:00002003]  | 0 |
| MMPC-3109226-ST-0 | MMPC93332686ST  | metagenome | Illumina HiSeq 4000 | 0 | 350 | 150 | 24901051  | feces [ENVO:00002003]  | 0 |
| MMPC-3109227-ST-0 | MMPC92143124ST  | metagenome | Illumina HiSeq 4000 | 0 | 350 | 150 | 23379659  | feces [ENVO:00002003]  | 0 |
| MMPC-3109228-ST-0 | MMPC34385278ST  | metagenome | Illumina HiSeq 4000 | 0 | 350 | 150 | 57769402  | feces [ENVO:00002003]  | 0 |
| MMPC-3109232-ST-0 | MMPC36947286ST  | metagenome | Illumina HiSeq 4000 | 0 | 350 | 150 | 31537988  | feces [ENVO:00002003]  | 0 |
| MMPC-3109233-ST-0 | MMPC71968369ST  | metagenome | Illumina HiSeq 4000 | 0 | 350 | 150 | 117568149 | feces [ENVO:00002003]  | 0 |
| MMPC-3109234-ST-0 | MMPC74548980ST  | metagenome | Illumina HiSeq 4000 | 0 | 350 | 150 | 35408139  | feces [ENVO:00002003]  | 0 |
| MMPC-3109236-ST-0 | MMPC34834469ST  | metagenome | Illumina HiSeq 4000 | 0 | 350 | 150 | 35375340  | feces [ENVO:00002003]  | 0 |
| MMPC-3109237-ST-0 | MMPC50966165ST  | metagenome | Illumina HiSeq 4000 | 0 | 350 | 150 | 52246735  | feces [ENVO:00002003]  | 0 |
| MMPC-3109238-ST-0 | MMPC99183360ST  | metagenome | Illumina HiSeq 4000 | 0 | 350 | 150 | 37883668  | feces [ENVO:00002003]  | 0 |
| MMPC-3109301-ST-0 | MMPC35249031ST  | metagenome | Illumina HiSeq 4000 | 0 | 350 | 150 | 43745786  | feces [ENVO:00002003]  | 0 |
| MMPC-3109305-ST-0 | MMPC42290635ST  | metagenome | Illumina HiSeq 4000 | 0 | 350 | 150 | 89100466  | feces [ENVO:00002003]  | 0 |
| MMPC-3109306-ST-0 | MMPC42177786ST  | metagenome | Illumina HiSeq 4000 | 0 | 350 | 150 | 22749462  | feces [ENVO:00002003]  | 0 |
| MMPC-3109315-ST-0 | MMPC21236273ST  | metagenome | Illumina HiSeq 4000 | 0 | 350 | 150 | 42079811  | feces [ENVO:00002003]  | 0 |
| MMPC-3109319-ST-0 | MMPC11597832ST  | metagenome | Illumina HiSeq 4000 | 0 | 350 | 150 | 47040985  | feces [ENVO:00002003]  | 0 |
| MMPC-3109324-ST-0 | MMPC81505326ST  | metagenome | Illumina HiSeq 4000 | 0 | 350 | 150 | 82601665  | feces [ENVO:00002003]  | 0 |
| MMPC-3103102-SA-0 | MMPC54012223OR  | metagenome | Illumina HiSeq 4000 | 0 | 350 | 150 | 4639773   | saliva [ENVO:02000036] | 0 |
| MMPC-3103103-SA-0 | MMPCT71823580OR | metagenome | Illumina HiSeq 4000 | 0 | 350 | 150 | 10568615  | saliva [ENVO:02000036] | 0 |
| MMPC-3103106-SA-0 | MMPC76793553OR  | metagenome | Illumina HiSeq 4000 | 0 | 350 | 150 | 5174708   | saliva [ENVO:02000036] | 0 |
| MMPC-3103107-SA-0 | MMPC33950978OR  | metagenome | Illumina HiSeq 4000 | 0 | 350 | 150 | 3047069   | saliva [ENVO:02000036] | 0 |
| MMPC-3103108-SA-0 | MMPCT27235353OR | metagenome | Illumina HiSeq 4000 | 0 | 350 | 150 | 24305625  | saliva [ENVO:02000036] | 0 |
| MMPC-3103109-SA-0 | MMPC84070936OR  | metagenome | Illumina HiSeq 4000 | 0 | 350 | 150 | 22754410  | saliva [ENVO:02000036] | 0 |
| MMPC-3103111-SA-0 | MMPCT74186942OR | metagenome | Illumina HiSeq 4000 | 0 | 350 | 150 | 13359112  | saliva [ENVO:02000036] | 0 |
| MMPC-3103112-SA-0 | MMPC51170653OR  | metagenome | Illumina HiSeq 4000 | 0 | 350 | 150 | 9668483   | saliva [ENVO:02000036] | 0 |
| MMPC-3103114-SA-0 | MMPC26639644OR  | metagenome | Illumina HiSeq 4000 | 0 | 350 | 150 | 26536006  | saliva [ENVO:02000036] | 0 |
| MMPC-3103115-SA-0 | MMPC24238465OR  | metagenome | Illumina HiSeq 4000 | 0 | 350 | 150 | 1190050   | saliva [ENVO:02000036] | 0 |
| MMPC-3103116-SA-0 | MMPC48007504OR  | metagenome | Illumina HiSeq 4000 | 0 | 350 | 150 | 27468049  | saliva [ENVO:02000036] | 0 |
| MMPC-3103117-SA-0 | MMPC24667695OR  | metagenome | Illumina HiSeq 4000 | 0 | 350 | 150 | 5172735   | saliva [ENVO:02000036] | 0 |
| MMPC-3103118-SA-0 | MMPC38043539OR  | metagenome | Illumina HiSeq 4000 | 0 | 350 | 150 | 20782971  | saliva [ENVO:02000036] | 0 |
| MMPC-3103119-SA-0 | MMPC11188431OR  | metagenome | Illumina HiSeq 4000 | 0 | 350 | 150 | 25870866  | saliva [ENVO:02000036] | 0 |
| MMPC-3103120-SA-0 | MMPCT90304226OR | metagenome | Illumina HiSeq 4000 | 0 | 350 | 150 | 19302260  | saliva [ENVO:02000036] | 0 |
| MMPC-3103121-SA-0 | MMPC32262645OR  | metagenome | Illumina HiSeq 4000 | 0 | 350 | 150 | 19336162  | saliva [ENVO:02000036] | 0 |
| MMPC-3103124-SA-0 | MMPC36945431OR  | metagenome | Illumina HiSeq 4000 | 0 | 350 | 150 | 2761113   | saliva [ENVO:02000036] | 0 |
| MMPC-3103125-SA-0 | MMPC55889507OR  | metagenome | Illumina HiSeq 4000 | 0 | 350 | 150 | 10636750  | saliva [ENVO:02000036] | 0 |
| MMPC-3103126-SA-0 | MMPC17325940OR  | metagenome | Illumina HiSeq 4000 | 0 | 350 | 150 | 9278513   | saliva [ENVO:02000036] | 0 |
| MMPC-3103127-SA-0 | MMPCT81782599OR | metagenome | Illumina HiSeq 4000 | 0 | 350 | 150 | 1725271   | saliva [ENVO:02000036] | 0 |
| MMPC-3103129-SA-0 | MMPC52574889OR  | metagenome | Illumina HiSeq 4000 | 0 | 350 | 150 | 4074564   | saliva [ENVO:02000036] | 0 |
| MMPC-3103202-SA-0 | MMPC36095950OR  | metagenome | Illumina HiSeq 4000 | 0 | 350 | 150 | 2719346   | saliva [ENVO:02000036] | 0 |
| MMPC-3103203-SA-0 | MMPC28881424OR  | metagenome | Illumina HiSeq 4000 | 0 | 350 | 150 | 22060600  | saliva [ENVO:02000036] | 0 |
| MMPC-3103206-SA-0 | MMPC96912492OR  | metagenome | Illumina HiSeq 4000 | 0 | 350 | 150 | 29036267  | saliva [ENVO:02000036] | 0 |
| MMPC-3103207-SA-0 | MMPCT19824023OR | metagenome | Illumina HiSeq 4000 | 0 | 350 | 150 | 24225787  | saliva [ENVO:02000036] | 0 |
| MMPC-3103208-SA-0 | MMPC90619750OR  | metagenome | Illumina HiSeq 4000 | 0 | 350 | 150 | 3644416   | saliva [ENVO:02000036] | 0 |
| MMPC-3103209-SA-0 | MMPC19288609OR  | metagenome | Illumina HiSeq 4000 | 0 | 350 | 150 | 5173307   | saliva [ENVO:02000036] | 0 |
| MMPC-3103211-SA-0 | MMPC58110896OR  | metagenome | Illumina HiSeq 4000 | 0 | 350 | 150 | 14608140  | saliva [ENVO:02000036] | 0 |

|                      |                |            |                     |   |     |     |          |                           |   |
|----------------------|----------------|------------|---------------------|---|-----|-----|----------|---------------------------|---|
| MMPC-3103212-SA-0    | MMPC73162206OR | metagenome | Illumina HiSeq 4000 | 0 | 350 | 150 | 13760338 | saliva [ENVO:02000036]    | 0 |
| MMPC-3103214-SA-0    | MMPC93850203OR | metagenome | Illumina HiSeq 4000 | 0 | 350 | 150 | 23079043 | saliva [ENVO:02000036]    | 0 |
| MMPC-3103215-SA-0    | MMPC24307334OR | metagenome | Illumina HiSeq 4000 | 0 | 350 | 150 | 24381582 | saliva [ENVO:02000036]    | 0 |
| MMPC-3103216-SA-0    | MMPC19845294OR | metagenome | Illumina HiSeq 4000 | 0 | 350 | 150 | 586889   | saliva [ENVO:02000036]    | 0 |
| MMPC-3103217-SA-0    | MMPC34133423OR | metagenome | Illumina HiSeq 4000 | 0 | 350 | 150 | 11088793 | saliva [ENVO:02000036]    | 0 |
| MMPC-3103218-SA-0    | MMPC71556090OR | metagenome | Illumina HiSeq 4000 | 0 | 350 | 150 | 23124397 | saliva [ENVO:02000036]    | 0 |
| MMPC-3103219-SA-0    | MMPC91688118OR | metagenome | Illumina HiSeq 4000 | 0 | 350 | 150 | 3228394  | saliva [ENVO:02000036]    | 0 |
| MMPC-3103220-SA-0    | MMPC62647302OR | metagenome | Illumina HiSeq 4000 | 0 | 350 | 150 | 21615248 | saliva [ENVO:02000036]    | 0 |
| MMPC-3103221-SA-0    | MMPC65407889OR | metagenome | Illumina HiSeq 4000 | 0 | 350 | 150 | 9669442  | saliva [ENVO:02000036]    | 0 |
| MMPC-3103223-SA-0    | MMPC31969297OR | metagenome | Illumina HiSeq 4000 | 0 | 350 | 150 | 10392474 | saliva [ENVO:02000036]    | 0 |
| MMPC-3103224-SA-0    | MMPC56597853OR | metagenome | Illumina HiSeq 4000 | 0 | 350 | 150 | 6055196  | saliva [ENVO:02000036]    | 0 |
| MMPC-3103225-SA-0    | MMPC56843559OR | metagenome | Illumina HiSeq 4000 | 0 | 350 | 150 | 7623136  | saliva [ENVO:02000036]    | 0 |
| MMPC-3103226-SA-0    | MMPC64507639OR | metagenome | Illumina HiSeq 4000 | 0 | 350 | 150 | 19496040 | saliva [ENVO:02000036]    | 0 |
| MMPC-3103227-SA-0    | MMPC64423720OR | metagenome | Illumina HiSeq 4000 | 0 | 350 | 150 | 6255265  | saliva [ENVO:02000036]    | 0 |
| MMPC-3103228-SA-0    | MMPC60219907OR | metagenome | Illumina HiSeq 4000 | 0 | 350 | 150 | 15063547 | saliva [ENVO:02000036]    | 0 |
| MMPC-3103229-SA-0    | MMPC71889536OR | metagenome | Illumina HiSeq 4000 | 0 | 350 | 150 | 5309775  | saliva [ENVO:02000036]    | 0 |
| MMPC-3103302-SA-0    | MMPC68638114OR | metagenome | Illumina HiSeq 4000 | 0 | 350 | 150 | 21593638 | saliva [ENVO:02000036]    | 0 |
| MMPC-3103303-SA-0    | MMPC85565182OR | metagenome | Illumina HiSeq 4000 | 0 | 350 | 150 | 27146282 | saliva [ENVO:02000036]    | 0 |
| MMPC-3103307-SA-0    | MMPC78869687OR | metagenome | Illumina HiSeq 4000 | 0 | 350 | 150 | 2896177  | saliva [ENVO:02000036]    | 0 |
| MMPC-3103309-SA-0    | MMPC52849207OR | metagenome | Illumina HiSeq 4000 | 0 | 350 | 150 | 4140770  | saliva [ENVO:02000036]    | 0 |
| MMPC-3103315-SA-0    | MMPC83526018OR | metagenome | Illumina HiSeq 4000 | 0 | 350 | 150 | 3405407  | saliva [ENVO:02000036]    | 0 |
| MMPC-3103318-SA-0    | MMPC57142773OR | metagenome | Illumina HiSeq 4000 | 0 | 350 | 150 | 21599119 | saliva [ENVO:02000036]    | 0 |
| MMPC-3103319-SA-0    | MMPC54160426OR | metagenome | Illumina HiSeq 4000 | 0 | 350 | 150 | 15712615 | saliva [ENVO:02000036]    | 0 |
| MMPC-3103330-SA-0    | MMPC75414130OR | metagenome | Illumina HiSeq 4000 | 0 | 350 | 150 | 13142288 | saliva [ENVO:02000036]    | 0 |
| MMPC-3109101-SA-0    | MMPC49718201OR | metagenome | Illumina HiSeq 4000 | 0 | 350 | 150 | 10271280 | saliva [ENVO:02000036]    | 0 |
| MMPC-3109102-SA-0    | MMPC95809433OR | metagenome | Illumina HiSeq 4000 | 0 | 350 | 150 | 2270393  | saliva [ENVO:02000036]    | 0 |
| MMPC-3109103-SA-0    | MMPC16794525OR | metagenome | Illumina HiSeq 4000 | 0 | 350 | 150 | 9038542  | saliva [ENVO:02000036]    | 0 |
| MMPC-3109104-SA-0    | MMPC19392645OR | metagenome | Illumina HiSeq 4000 | 0 | 350 | 150 | 3568912  | saliva [ENVO:02000036]    | 0 |
| MMPC-3109105-SA-0    | MMPC90169023OR | metagenome | Illumina HiSeq 4000 | 0 | 350 | 150 | 7204089  | saliva [ENVO:02000036]    | 0 |
| MMPC-3109106-SA-0    | MMPC86976445OR | metagenome | Illumina HiSeq 4000 | 0 | 350 | 150 | 10768021 | saliva [ENVO:02000036]    | 0 |
| MMPC-3109107-SA-0    | MMPC44731247OR | metagenome | Illumina HiSeq 4000 | 0 | 350 | 150 | 8048004  | saliva [ENVO:02000036]    | 0 |
| MMPC-3109108-SA-0    | MMPC65660081OR | metagenome | Illumina HiSeq 4000 | 0 | 350 | 150 | 21617221 | saliva [ENVO:02000036]    | 0 |
| MMPC-3109109-SA-0    | MMPC41147837OR | metagenome | Illumina HiSeq 4000 | 0 | 350 | 150 | 6344692  | saliva [ENVO:02000036]    | 0 |
| MMPC-3109110-SA-0    | MMPC41118143OR | metagenome | Illumina HiSeq 4000 | 0 | 350 | 150 | 4560687  | saliva [ENVO:02000036]    | 0 |
| MMPC-3109111-SA-0    | MMPC66171614OR | metagenome | Illumina HiSeq 4000 | 0 | 350 | 150 | 3102631  | saliva [ENVO:02000036]    | 0 |
| MMPC-3109112-SA-0    | MMPC96133527OR | metagenome | Illumina HiSeq 4000 | 0 | 350 | 150 | 2593028  | saliva [ENVO:02000036]    | 0 |
| MMPC-3109113-SA-0    | MMPC93366499OR | metagenome | Illumina HiSeq 4000 | 0 | 350 | 150 | 1364850  | saliva [ENVO:02000036]    | 0 |
| MMPC-3109114-SA-0    | MMPC65022621OR | metagenome | Illumina HiSeq 4000 | 0 | 350 | 150 | 16802842 | saliva [ENVO:02000036]    | 0 |
| MMPC-3109115-SA-0    | MMPC78563626OR | metagenome | Illumina HiSeq 4000 | 0 | 350 | 150 | 10555862 | saliva [ENVO:02000036]    | 0 |
| MMPC-3109116-SA-0    | MMPC53407274OR | metagenome | Illumina HiSeq 4000 | 0 | 350 | 150 | 5335597  | saliva [ENVO:02000036]    | 0 |
| MMPC-3109117-SA-0    | MMPC53148798OR | metagenome | Illumina HiSeq 4000 | 0 | 350 | 150 | 3146036  | saliva [ENVO:02000036]    | 0 |
| MMPC-3109118-SA-0    | MMPC56085636OR | metagenome | Illumina HiSeq 4000 | 0 | 350 | 150 | 8008994  | saliva [ENVO:02000036]    | 0 |
| MMPC-3109119-SA-0    | MMPC90053642OR | metagenome | Illumina HiSeq 4000 | 0 | 350 | 150 | 12510374 | saliva [ENVO:02000036]    | 0 |
| MMPC-3109121-SA-0    | MMPC60116897OR | metagenome | Illumina HiSeq 4000 | 0 | 350 | 150 | 9130757  | saliva [ENVO:02000036]    | 0 |
| MMPC-3109122-SA-0    | MMPC21941683OR | metagenome | Illumina HiSeq 4000 | 0 | 350 | 150 | 1074483  | saliva [ENVO:02000036]    | 0 |
| MMPC-3109123-SA-0    | MMPC32965142OR | metagenome | Illumina HiSeq 4000 | 0 | 350 | 150 | 5930486  | saliva [ENVO:02000036]    | 0 |
| MMPC-3109201-SA-0    | MMPC95669500OR | metagenome | Illumina HiSeq 4000 | 0 | 350 | 150 | 8322995  | saliva [ENVO:02000036]    | 0 |
| MMPC-3109202-SA-0    | MMPC31897883OR | metagenome | Illumina HiSeq 4000 | 0 | 350 | 150 | 26509835 | saliva [ENVO:02000036]    | 0 |
| MMPC-3109203-SA-0    | MMPC46886173OR | metagenome | Illumina HiSeq 4000 | 0 | 350 | 150 | 24073587 | saliva [ENVO:02000036]    | 0 |
| MMPC-3109204-SA-0    | MMPC55860177OR | metagenome | Illumina HiSeq 4000 | 0 | 350 | 150 | 6325821  | saliva [ENVO:02000036]    | 0 |
| MMPC-3109205-SA-0    | MMPC39189434OR | metagenome | Illumina HiSeq 4000 | 0 | 350 | 150 | 14245117 | saliva [ENVO:02000036]    | 0 |
| MMPC-3109206-SA-0    | MMPC54455576OR | metagenome | Illumina HiSeq 4000 | 0 | 350 | 150 | 7426412  | saliva [ENVO:02000036]    | 0 |
| MMPC-3109207-SA-0    | MMPC76436299OR | metagenome | Illumina HiSeq 4000 | 0 | 350 | 150 | 15891919 | saliva [ENVO:02000036]    | 0 |
| MMPC-3109208-SA-0    | MMPC48555115OR | metagenome | Illumina HiSeq 4000 | 0 | 350 | 150 | 1067722  | saliva [ENVO:02000036]    | 0 |
| MMPC-3109208-SA-0    | MMPC95862719OR | metagenome | Illumina HiSeq 4000 | 0 | 350 | 150 | 3806358  | saliva [ENVO:02000036]    | 0 |
| MMPC-3109209-SA-0    | MMPC61999432OR | metagenome | Illumina HiSeq 4000 | 0 | 350 | 150 | 1080307  | saliva [ENVO:02000036]    | 0 |
| MMPC-3109210-SA-0    | MMPC92345363OR | metagenome | Illumina HiSeq 4000 | 0 | 350 | 150 | 8191798  | saliva [ENVO:02000036]    | 0 |
| MMPC-3109210-SA-0    | MMPC87948870OR | metagenome | Illumina HiSeq 4000 | 0 | 350 | 150 | 9477616  | saliva [ENVO:02000036]    | 0 |
| MMPC-3109211-SA-0    | MMPC31618027OR | metagenome | Illumina HiSeq 4000 | 0 | 350 | 150 | 3968655  | saliva [ENVO:02000036]    | 0 |
| MMPC-3109212-SA-0    | MMPC14824749OR | metagenome | Illumina HiSeq 4000 | 0 | 350 | 150 | 13866065 | saliva [ENVO:02000036]    | 0 |
| MMPC-3109213-SA-0    | MMPC15910261OR | metagenome | Illumina HiSeq 4000 | 0 | 350 | 150 | 6374672  | saliva [ENVO:02000036]    | 0 |
| MMPC-3109214-SA-0    | MMPC27383418OR | metagenome | Illumina HiSeq 4000 | 0 | 350 | 150 | 10627159 | saliva [ENVO:02000036]    | 0 |
| MMPC-3109215-SA-0    | MMPC12870707OR | metagenome | Illumina HiSeq 4000 | 0 | 350 | 150 | 2480791  | saliva [ENVO:02000036]    | 0 |
| MMPC-3109216-SA-0    | MMPC15441403OR | metagenome | Illumina HiSeq 4000 | 0 | 350 | 150 | 5975117  | saliva [ENVO:02000036]    | 0 |
| MMPC-3109217-SA-0    | MMPC73436744OR | metagenome | Illumina HiSeq 4000 | 0 | 350 | 150 | 1084350  | saliva [ENVO:02000036]    | 0 |
| MMPC-3109218-SA-0    | MMPC63628582OR | metagenome | Illumina HiSeq 4000 | 0 | 350 | 150 | 5800566  | saliva [ENVO:02000036]    | 0 |
| MMPC-3109219-SA-0    | MMPC13132715OR | metagenome | Illumina HiSeq 4000 | 0 | 350 | 150 | 9675003  | saliva [ENVO:02000036]    | 0 |
| MMPC-3109220-SA-0    | MMPC23272164OR | metagenome | Illumina HiSeq 4000 | 0 | 350 | 150 | 4438841  | saliva [ENVO:02000036]    | 0 |
| MMPC-3109221-SA-0    | MMPC32315383OR | metagenome | Illumina HiSeq 4000 | 0 | 350 | 150 | 19454442 | saliva [ENVO:02000036]    | 0 |
| MMPC-3109222-SA-1    | MMPC57477276OR | metagenome | Illumina HiSeq 4000 | 0 | 350 | 150 | 10220171 | saliva [ENVO:02000036]    | 1 |
| MMPC-3109222-SA-1    | MMPC33706732OR | metagenome | Illumina HiSeq 4000 | 0 | 350 | 150 | 4735876  | saliva [ENVO:02000036]    | 1 |
| MMPC-3109223-SA-0    | MMPC41357154OR | metagenome | Illumina HiSeq 4000 | 0 | 350 | 150 | 38849239 | saliva [ENVO:02000036]    | 0 |
| MMPC-3109301-SA-0    | MMPC93150325OR | metagenome | Illumina HiSeq 4000 | 0 | 350 | 150 | 16728492 | saliva [ENVO:02000036]    | 0 |
| MMPC-3109315-SA-0    | MMPC96783701OR | metagenome | Illumina HiSeq 4000 | 0 | 350 | 150 | 11039995 | saliva [ENVO:02000036]    | 0 |
| MMPC-3109319-SA-0    | MMPC96263337OR | metagenome | Illumina HiSeq 4000 | 0 | 350 | 150 | 6969069  | saliva [ENVO:02000036]    | 0 |
| MMPC-3103106129-DU-0 | MMPC89983827DU | 16S        | Illumina MiSeq      | 0 | 292 | 292 | 54547    | duodenum [UBERON:0002114] | 0 |
| MMPC-3103107129-DU-0 | MMPC73658283DU | 16S        | Illumina MiSeq      | 0 | 292 | 292 | 64250    | duodenum [UBERON:0002114] | 0 |
| MMPC-3103108129-DU-0 | MMPC33709560DU | 16S        | Illumina MiSeq      | 0 | 292 | 292 | 96936    | duodenum [UBERON:0002114] | 0 |
| MMPC-3103111129-DU-0 | MMPC57647850DU | 16S        | Illumina MiSeq      | 0 | 292 | 292 | 73326    | duodenum [UBERON:0002114] | 0 |
| MMPC-3103118129-DU-0 | MMPC69746296DU | 16S        | Illumina MiSeq      | 0 | 292 | 292 | 120850   | duodenum [UBERON:0002114] | 0 |
| MMPC-3103119129-DU-0 | MMPC80849866DU | 16S        | Illumina MiSeq      | 0 | 292 | 292 | 130442   | duodenum [UBERON:0002114] | 0 |
| MMPC-3103119129-DU-c | MMPC43438216DU | 16S        | Illumina MiSeq      | 0 | 292 | 292 | 112252   | duodenum [UBERON:0002114] | 0 |
| MMPC-3103120129-DU-0 | MMPC72924201DU | 16S        | Illumina MiSeq      | 0 | 292 | 292 | 86565    | duodenum [UBERON:0002114] | 0 |
| MMPC-3103120129-DU-c | MMPC14537843DU | 16S        | Illumina MiSeq      | 0 | 292 | 292 | 86185    | duodenum [UBERON:0002114] | 0 |
| MMPC-3103121129-DU-0 | MMPC36189783DU | 16S        | Illumina MiSeq      | 0 | 292 | 292 | 37643    | duodenum [UBERON:0002114] | 0 |
| MMPC-3103125129-DU-0 | MMPC80414181DU | 16S        | Illumina MiSeq      | 0 | 292 | 292 | 39130    | duodenum [UBERON:0002114] | 0 |
| MMPC-3103129129-DU-0 | MMPC53972105DU | 16S        | Illumina MiSeq      | 0 | 292 | 292 | 85409    | duodenum [UBERON:0002114] | 0 |
| MMPC-3103302129-DU-0 | MMPC19587595DU | 16S        | Illumina MiSeq      | 0 | 292 | 292 | 104839   | duodenum [UBERON:0002114] | 0 |
| MMPC-3103307129-DU-0 | MMPC68318389DU | 16S        | Illumina MiSeq      | 0 | 292 | 292 | 71624    | duodenum [UBERON:0002114] | 0 |
| MMPC-3103307129-DU-0 | MMPC71903222DU | 16S        | Illumina MiSeq      | 0 | 292 | 292 | 58134    | duodenum [UBERON:0002114] | 0 |

|                   |                   |     |                |   |     |     |    |                       |   |
|-------------------|-------------------|-----|----------------|---|-----|-----|----|-----------------------|---|
| MMPC-3103102-ST-0 | MMPC94299916ST    | 165 | Illumina MiSeq | 0 | 292 | 292 | NA | feces [ENVO:00002003] | 0 |
| MMPC-3103103-ST-0 | MMPC24623808ST    | 165 | Illumina MiSeq | 0 | 292 | 292 | NA | feces [ENVO:00002003] | 0 |
| MMPC-3103106-ST-0 | MMPC64014581ST    | 165 | Illumina MiSeq | 0 | 292 | 292 | NA | feces [ENVO:00002003] | 0 |
| MMPC-3103107-ST-0 | MMPC82135016ST    | 165 | Illumina MiSeq | 0 | 292 | 292 | NA | feces [ENVO:00002003] | 0 |
| MMPC-3103108-ST-0 | MMPC45547467ST    | 165 | Illumina MiSeq | 0 | 292 | 292 | NA | feces [ENVO:00002003] | 0 |
| MMPC-3103109-ST-0 | MMPC66174878ST    | 165 | Illumina MiSeq | 0 | 292 | 292 | NA | feces [ENVO:00002003] | 0 |
| MMPC-3103111-ST-0 | MMPC91082775ST    | 165 | Illumina MiSeq | 0 | 292 | 292 | NA | feces [ENVO:00002003] | 0 |
| MMPC-3103112-ST-0 | MMPC29677848ST    | 165 | Illumina MiSeq | 0 | 292 | 292 | NA | feces [ENVO:00002003] | 0 |
| MMPC-3103114-ST-0 | MMPC39575354ST    | 165 | Illumina MiSeq | 0 | 292 | 292 | NA | feces [ENVO:00002003] | 0 |
| MMPC-3103115-ST-0 | MMPC50889135ST    | 165 | Illumina MiSeq | 0 | 292 | 292 | NA | feces [ENVO:00002003] | 0 |
| MMPC-3103116-ST-0 | MMPC50185623ST    | 165 | Illumina MiSeq | 0 | 292 | 292 | NA | feces [ENVO:00002003] | 0 |
| MMPC-3103117-ST-0 | MMPC85685924ST    | 165 | Illumina MiSeq | 0 | 292 | 292 | NA | feces [ENVO:00002003] | 0 |
| MMPC-3103118-ST-0 | MMPC59183318ST    | 165 | Illumina MiSeq | 0 | 292 | 292 | NA | feces [ENVO:00002003] | 0 |
| MMPC-3103119-ST-0 | MMPC71791865ST    | 165 | Illumina MiSeq | 0 | 292 | 292 | NA | feces [ENVO:00002003] | 0 |
| MMPC-3103120-ST-0 | MMPC21711187ST    | 165 | Illumina MiSeq | 0 | 292 | 292 | NA | feces [ENVO:00002003] | 0 |
| MMPC-3103121-ST-0 | MMPC21060483ST    | 165 | Illumina MiSeq | 0 | 292 | 292 | NA | feces [ENVO:00002003] | 0 |
| MMPC-3103124-ST-0 | MMPC82177922ST    | 165 | Illumina MiSeq | 0 | 292 | 292 | NA | feces [ENVO:00002003] | 0 |
| MMPC-3103125-ST-0 | MMPC54152785ST    | 165 | Illumina MiSeq | 0 | 292 | 292 | NA | feces [ENVO:00002003] | 0 |
| MMPC-3103126-ST-0 | MMPC84720270ST    | 165 | Illumina MiSeq | 0 | 292 | 292 | NA | feces [ENVO:00002003] | 0 |
| MMPC-3103127-ST-0 | MMPC61075350ST    | 165 | Illumina MiSeq | 0 | 292 | 292 | NA | feces [ENVO:00002003] | 0 |
| MMPC-3103129-ST-0 | MMPC76947975ST    | 165 | Illumina MiSeq | 0 | 292 | 292 | NA | feces [ENVO:00002003] | 0 |
| MMPC-3103202-ST-0 | MMPC17827720ST    | 165 | Illumina MiSeq | 0 | 292 | 292 | NA | feces [ENVO:00002003] | 0 |
| MMPC-3103203-ST-0 | MMPC43730151ST    | 165 | Illumina MiSeq | 0 | 292 | 292 | NA | feces [ENVO:00002003] | 0 |
| MMPC-3103206-ST-0 | MMPC62596168ST    | 165 | Illumina MiSeq | 0 | 292 | 292 | NA | feces [ENVO:00002003] | 0 |
| MMPC-3103207-ST-0 | MMPC62530950ST    | 165 | Illumina MiSeq | 0 | 292 | 292 | NA | feces [ENVO:00002003] | 0 |
| MMPC-3103208-ST-0 | MMPC57166568ST    | 165 | Illumina MiSeq | 0 | 292 | 292 | NA | feces [ENVO:00002003] | 0 |
| MMPC-3103209-ST-0 | MMPC15725313ST    | 165 | Illumina MiSeq | 0 | 292 | 292 | NA | feces [ENVO:00002003] | 0 |
| MMPC-3103211-ST-0 | MMPC84441239ST    | 165 | Illumina MiSeq | 0 | 292 | 292 | NA | feces [ENVO:00002003] | 0 |
| MMPC-3103212-ST-0 | MMPC56144255ST    | 165 | Illumina MiSeq | 0 | 292 | 292 | NA | feces [ENVO:00002003] | 0 |
| MMPC-3103214-ST-0 | MMPC99601038ST    | 165 | Illumina MiSeq | 0 | 292 | 292 | NA | feces [ENVO:00002003] | 0 |
| MMPC-3103215-ST-0 | MMPC75618331ST    | 165 | Illumina MiSeq | 0 | 292 | 292 | NA | feces [ENVO:00002003] | 0 |
| MMPC-3103216-ST-0 | MMPC16095290ST    | 165 | Illumina MiSeq | 0 | 292 | 292 | NA | feces [ENVO:00002003] | 0 |
| MMPC-3103217-ST-0 | MMPC87962373ST    | 165 | Illumina MiSeq | 0 | 292 | 292 | NA | feces [ENVO:00002003] | 0 |
| MMPC-3103218-ST-0 | MMPC99264450ST    | 165 | Illumina MiSeq | 0 | 292 | 292 | NA | feces [ENVO:00002003] | 0 |
| MMPC-3103219-ST-0 | MMPC66473877ST    | 165 | Illumina MiSeq | 0 | 292 | 292 | NA | feces [ENVO:00002003] | 0 |
| MMPC-3103220-ST-0 | MMPC80434434ST    | 165 | Illumina MiSeq | 0 | 292 | 292 | NA | feces [ENVO:00002003] | 0 |
| MMPC-3103221-ST-0 | MMPC47628612ST    | 165 | Illumina MiSeq | 0 | 292 | 292 | NA | feces [ENVO:00002003] | 0 |
| MMPC-3103223-ST-0 | MMPC12333772ST    | 165 | Illumina MiSeq | 0 | 292 | 292 | NA | feces [ENVO:00002003] | 0 |
| MMPC-3103224-ST-0 | MMPC50116517ST    | 165 | Illumina MiSeq | 0 | 292 | 292 | NA | feces [ENVO:00002003] | 0 |
| MMPC-3103225-ST-0 | MMPC44968505ST    | 165 | Illumina MiSeq | 0 | 292 | 292 | NA | feces [ENVO:00002003] | 0 |
| MMPC-3103226-ST-0 | MMPC52586872ST    | 165 | Illumina MiSeq | 0 | 292 | 292 | NA | feces [ENVO:00002003] | 0 |
| MMPC-3103227-ST-0 | MMPC32976245ST    | 165 | Illumina MiSeq | 0 | 292 | 292 | NA | feces [ENVO:00002003] | 0 |
| MMPC-3103228-ST-0 | MMPC95231866ST    | 165 | Illumina MiSeq | 0 | 292 | 292 | NA | feces [ENVO:00002003] | 0 |
| MMPC-3103229-ST-0 | MMPC68831667ST    | 165 | Illumina MiSeq | 0 | 292 | 292 | NA | feces [ENVO:00002003] | 0 |
| MMPC-3103302-ST-0 | MMPC60182036ST    | 165 | Illumina MiSeq | 0 | 292 | 292 | NA | feces [ENVO:00002003] | 0 |
| MMPC-3103303-ST-0 | MMPC45406530ST    | 165 | Illumina MiSeq | 0 | 292 | 292 | NA | feces [ENVO:00002003] | 0 |
| MMPC-3103306-ST-0 | MMPC99577153ST    | 165 | Illumina MiSeq | 0 | 292 | 292 | NA | feces [ENVO:00002003] | 0 |
| MMPC-3103307-ST-0 | MMPC93314562ST    | 165 | Illumina MiSeq | 0 | 292 | 292 | NA | feces [ENVO:00002003] | 0 |
| MMPC-3103309-ST-0 | MMPC85038078ST    | 165 | Illumina MiSeq | 0 | 292 | 292 | NA | feces [ENVO:00002003] | 0 |
| MMPC-3103311-ST-0 | MMPC11696984ST    | 165 | Illumina MiSeq | 0 | 292 | 292 | NA | feces [ENVO:00002003] | 0 |
| MMPC-3103312-ST-0 | MMPC41061772ST    | 165 | Illumina MiSeq | 0 | 292 | 292 | NA | feces [ENVO:00002003] | 0 |
| MMPC-3103314-ST-0 | MMPC45116274ST    | 165 | Illumina MiSeq | 0 | 292 | 292 | NA | feces [ENVO:00002003] | 0 |
| MMPC-3103315-ST-0 | MMPC86671846ST    | 165 | Illumina MiSeq | 0 | 292 | 292 | NA | feces [ENVO:00002003] | 0 |
| MMPC-3103316-ST-0 | MMPC66358697ST    | 165 | Illumina MiSeq | 0 | 292 | 292 | NA | feces [ENVO:00002003] | 0 |
| MMPC-3103317-ST-0 | MMPC34674582ST    | 165 | Illumina MiSeq | 0 | 292 | 292 | NA | feces [ENVO:00002003] | 0 |
| MMPC-3103318-ST-0 | MMPC22518056ST    | 165 | Illumina MiSeq | 0 | 292 | 292 | NA | feces [ENVO:00002003] | 0 |
| MMPC-3103319-ST-0 | MMPC65945502ST    | 165 | Illumina MiSeq | 0 | 292 | 292 | NA | feces [ENVO:00002003] | 0 |
| MMPC-3103319-ST-0 | MMPC80934998ST    | 165 | Illumina MiSeq | 0 | 292 | 292 | NA | feces [ENVO:00002003] | 0 |
| MMPC-3103321-ST-0 | MMPC48683862ST    | 165 | Illumina MiSeq | 0 | 292 | 292 | NA | feces [ENVO:00002003] | 0 |
| MMPC-3103324-ST-0 | MMPC83668164ST    | 165 | Illumina MiSeq | 0 | 292 | 292 | NA | feces [ENVO:00002003] | 0 |
| MMPC-3103325-ST-0 | MMPC55570441ST    | 165 | Illumina MiSeq | 0 | 292 | 292 | NA | feces [ENVO:00002003] | 0 |
| MMPC-3103326-ST-0 | MMPC43042571ST    | 165 | Illumina MiSeq | 0 | 292 | 292 | NA | feces [ENVO:00002003] | 0 |
| MMPC-3103329-ST-0 | MMPC60345757ST    | 165 | Illumina MiSeq | 0 | 292 | 292 | NA | feces [ENVO:00002003] | 0 |
| MMPC-3103330-ST-0 | MMPC29021039ST    | 165 | Illumina MiSeq | 0 | 292 | 292 | NA | feces [ENVO:00002003] | 0 |
| MMPC-3109101-ST-0 | MMPC24977504ST    | 165 | Illumina MiSeq | 0 | 292 | 292 | NA | feces [ENVO:00002003] | 0 |
| MMPC-3109102-ST-0 | MMPC62392110ST    | 165 | Illumina MiSeq | 0 | 292 | 292 | NA | feces [ENVO:00002003] | 0 |
| MMPC-3109103-ST-0 | MMPC45287801ST    | 165 | Illumina MiSeq | 0 | 292 | 292 | NA | feces [ENVO:00002003] | 0 |
| MMPC-3109104-ST-0 | MMPC40826089ST    | 165 | Illumina MiSeq | 0 | 292 | 292 | NA | feces [ENVO:00002003] | 0 |
| MMPC-3109105-ST-0 | MMPC80964294ST    | 165 | Illumina MiSeq | 0 | 292 | 292 | NA | feces [ENVO:00002003] | 0 |
| MMPC-3109106-ST-0 | MMPC78341196ST    | 165 | Illumina MiSeq | 0 | 292 | 292 | NA | feces [ENVO:00002003] | 0 |
| MMPC-3109108-ST-0 | MMPC62146737ST    | 165 | Illumina MiSeq | 0 | 292 | 292 | NA | feces [ENVO:00002003] | 0 |
| MMPC-3109109-ST-0 | MMPC69770767ST    | 165 | Illumina MiSeq | 0 | 292 | 292 | NA | feces [ENVO:00002003] | 0 |
| MMPC-3109110-ST-0 | MMPC31154145ST    | 165 | Illumina MiSeq | 0 | 292 | 292 | NA | feces [ENVO:00002003] | 0 |
| MMPC-3109111-ST-0 | MMPC76934936ST    | 165 | Illumina MiSeq | 0 | 292 | 292 | NA | feces [ENVO:00002003] | 0 |
| MMPC-3109112-ST-0 | MMPC91853026ST    | 165 | Illumina MiSeq | 0 | 292 | 292 | NA | feces [ENVO:00002003] | 0 |
| MMPC-3109114-ST-0 | MMPC31444727ST    | 165 | Illumina MiSeq | 0 | 292 | 292 | NA | feces [ENVO:00002003] | 0 |
| MMPC-3109115-ST-0 | MMPC73932880ST    | 165 | Illumina MiSeq | 0 | 292 | 292 | NA | feces [ENVO:00002003] | 0 |
| MMPC-3109116-ST-0 | MMPC59288570ST    | 165 | Illumina MiSeq | 0 | 292 | 292 | NA | feces [ENVO:00002003] | 0 |
| MMPC-3109117-ST-0 | MMPC36926728ST    | 165 | Illumina MiSeq | 0 | 292 | 292 | NA | feces [ENVO:00002003] | 0 |
| MMPC-3109118-ST-0 | MMPC96496937ST    | 165 | Illumina MiSeq | 0 | 292 | 292 | NA | feces [ENVO:00002003] | 0 |
| MMPC-3109119-ST-0 | MMPC74128230ST    | 165 | Illumina MiSeq | 0 | 292 | 292 | NA | feces [ENVO:00002003] | 0 |
| MMPC-3109120-ST-0 | MMPC74940396ST    | 165 | Illumina MiSeq | 0 | 292 | 292 | NA | feces [ENVO:00002003] | 0 |
| MMPC-3109121-ST-0 | MMPC30256497ST    | 165 | Illumina MiSeq | 0 | 292 | 292 | NA | feces [ENVO:00002003] | 0 |
| MMPC-3109122-ST-0 | MMPC21699325ST    | 165 | Illumina MiSeq | 0 | 292 | 292 | NA | feces [ENVO:00002003] | 0 |
| MMPC-3109122-ST-0 | ## MMPC46833664ST | 165 | Illumina MiSeq | 0 | 292 | 292 | NA | feces [ENVO:00002003] | 0 |
| MMPC-3109123-ST-0 | MMPC91722361ST    | 165 | Illumina MiSeq | 0 | 292 | 292 | NA | feces [ENVO:00002003] | 0 |
| MMPC-3109124-ST-0 | MMPC94188621ST    | 165 | Illumina MiSeq | 0 | 292 | 292 | NA | feces [ENVO:00002003] | 0 |
| MMPC-3109125-ST-0 | MMPC91811211ST    | 165 | Illumina MiSeq | 0 | 292 | 292 | NA | feces [ENVO:00002003] | 0 |
| MMPC-3109126-ST-0 | MMPC90395905ST    | 165 | Illumina MiSeq | 0 | 292 | 292 | NA | feces [ENVO:00002003] | 0 |
| MMPC-3109136-ST-0 | MMPC22960059ST    | 165 | Illumina MiSeq | 0 | 292 | 292 | NA | feces [ENVO:00002003] | 0 |

|                   |                |     |                |   |     |     |    |                        |   |
|-------------------|----------------|-----|----------------|---|-----|-----|----|------------------------|---|
| MMPC-3109137-ST-0 | MMPC61697353ST | 165 | Illumina MiSeq | 0 | 292 | 292 | NA | feces [ENVO:00002003]  | 0 |
| MMPC-3109138-ST-0 | MMPC82855966ST | 165 | Illumina MiSeq | 0 | 292 | 292 | NA | feces [ENVO:00002003]  | 0 |
| MMPC-3109139-ST-0 | MMPC29844214ST | 165 | Illumina MiSeq | 0 | 292 | 292 | NA | feces [ENVO:00002003]  | 0 |
| MMPC-3109140-ST-0 | MMPC50483831ST | 165 | Illumina MiSeq | 0 | 292 | 292 | NA | feces [ENVO:00002003]  | 0 |
| MMPC-3109141-ST-0 | MMPC48709788ST | 165 | Illumina MiSeq | 0 | 292 | 292 | NA | feces [ENVO:00002003]  | 0 |
| MMPC-3109201-ST-0 | MMPC84981989ST | 165 | Illumina MiSeq | 0 | 292 | 292 | NA | feces [ENVO:00002003]  | 0 |
| MMPC-3109203-ST-0 | MMPC94959046ST | 165 | Illumina MiSeq | 0 | 292 | 292 | NA | feces [ENVO:00002003]  | 0 |
| MMPC-3109204-ST-0 | MMPC30552564ST | 165 | Illumina MiSeq | 0 | 292 | 292 | NA | feces [ENVO:00002003]  | 0 |
| MMPC-3109205-ST-0 | MMPC80314763ST | 165 | Illumina MiSeq | 0 | 292 | 292 | NA | feces [ENVO:00002003]  | 0 |
| MMPC-3109206-ST-0 | MMPC99362803ST | 165 | Illumina MiSeq | 0 | 292 | 292 | NA | feces [ENVO:00002003]  | 0 |
| MMPC-3109209-ST-0 | MMPC74755332ST | 165 | Illumina MiSeq | 0 | 292 | 292 | NA | feces [ENVO:00002003]  | 0 |
| MMPC-3109210-ST-0 | MMPC94006070ST | 165 | Illumina MiSeq | 0 | 292 | 292 | NA | feces [ENVO:00002003]  | 0 |
| MMPC-3109211-ST-0 | MMPC61453521ST | 165 | Illumina MiSeq | 0 | 292 | 292 | NA | feces [ENVO:00002003]  | 0 |
| MMPC-3109212-ST-0 | MMPC13718212ST | 165 | Illumina MiSeq | 0 | 292 | 292 | NA | feces [ENVO:00002003]  | 0 |
| MMPC-3109213-ST-0 | MMPC29098777ST | 165 | Illumina MiSeq | 0 | 292 | 292 | NA | feces [ENVO:00002003]  | 0 |
| MMPC-3109215-ST-0 | MMPC31684537ST | 165 | Illumina MiSeq | 0 | 292 | 292 | NA | feces [ENVO:00002003]  | 0 |
| MMPC-3109216-ST-0 | MMPC52848555ST | 165 | Illumina MiSeq | 0 | 292 | 292 | NA | feces [ENVO:00002003]  | 0 |
| MMPC-3109217-ST-0 | MMPC45463255ST | 165 | Illumina MiSeq | 0 | 292 | 292 | NA | feces [ENVO:00002003]  | 0 |
| MMPC-3109218-ST-0 | MMPC66427657ST | 165 | Illumina MiSeq | 0 | 292 | 292 | NA | feces [ENVO:00002003]  | 0 |
| MMPC-3109219-ST-0 | MMPC83101778ST | 165 | Illumina MiSeq | 0 | 292 | 292 | NA | feces [ENVO:00002003]  | 0 |
| MMPC-3109221-ST-0 | MMPC45481781ST | 165 | Illumina MiSeq | 0 | 292 | 292 | NA | feces [ENVO:00002003]  | 0 |
| MMPC-3109222-ST-0 | MMPC28617437ST | 165 | Illumina MiSeq | 0 | 292 | 292 | NA | feces [ENVO:00002003]  | 0 |
| MMPC-3109223-ST-0 | MMPC49582267ST | 165 | Illumina MiSeq | 0 | 292 | 292 | NA | feces [ENVO:00002003]  | 0 |
| MMPC-3109226-ST-0 | MMPC57772499ST | 165 | Illumina MiSeq | 0 | 292 | 292 | NA | feces [ENVO:00002003]  | 0 |
| MMPC-3109232-ST-0 | MMPC92950288ST | 165 | Illumina MiSeq | 0 | 292 | 292 | NA | feces [ENVO:00002003]  | 0 |
| MMPC-3109234-ST-0 | MMPC35779891ST | 165 | Illumina MiSeq | 0 | 292 | 292 | NA | feces [ENVO:00002003]  | 0 |
| MMPC-3109236-ST-0 | MMPC19331607ST | 165 | Illumina MiSeq | 0 | 292 | 292 | NA | feces [ENVO:00002003]  | 0 |
| MMPC-3109237-ST-0 | MMPC55213614ST | 165 | Illumina MiSeq | 0 | 292 | 292 | NA | feces [ENVO:00002003]  | 0 |
| MMPC-3109238-ST-0 | MMPC25677890ST | 165 | Illumina MiSeq | 0 | 292 | 292 | NA | feces [ENVO:00002003]  | 0 |
| MMPC-3109301-ST-0 | MMPC43182434ST | 165 | Illumina MiSeq | 0 | 292 | 292 | NA | feces [ENVO:00002003]  | 0 |
| MMPC-3109315-ST-0 | MMPC38663896ST | 165 | Illumina MiSeq | 0 | 292 | 292 | NA | feces [ENVO:00002003]  | 0 |
| MMPC-3109319-ST-0 | MMPC66201737ST | 165 | Illumina MiSeq | 0 | 292 | 292 | NA | feces [ENVO:00002003]  | 0 |
| MMPC-3103102-SA-0 | MMPC68158800OR | 165 | Illumina MiSeq | 0 | 292 | 292 | NA | saliva [ENVO:02000036] | 0 |
| MMPC-3103103-SA-0 | MMPC55436260OR | 165 | Illumina MiSeq | 0 | 292 | 292 | NA | saliva [ENVO:02000036] | 0 |
| MMPC-3103106-SA-0 | MMPC88921841OR | 165 | Illumina MiSeq | 0 | 292 | 292 | NA | saliva [ENVO:02000036] | 0 |
| MMPC-3103107-SA-0 | MMPC71486420OR | 165 | Illumina MiSeq | 0 | 292 | 292 | NA | saliva [ENVO:02000036] | 0 |
| MMPC-3103108-SA-0 | MMPC46739872OR | 165 | Illumina MiSeq | 0 | 292 | 292 | NA | saliva [ENVO:02000036] | 0 |
| MMPC-3103109-SA-0 | MMPC31622432OR | 165 | Illumina MiSeq | 0 | 292 | 292 | NA | saliva [ENVO:02000036] | 0 |
| MMPC-3103111-SA-0 | MMPC51692793OR | 165 | Illumina MiSeq | 0 | 292 | 292 | NA | saliva [ENVO:02000036] | 0 |
| MMPC-3103112-SA-0 | MMPC12922693OR | 165 | Illumina MiSeq | 0 | 292 | 292 | NA | saliva [ENVO:02000036] | 0 |
| MMPC-3103114-SA-0 | MMPC22137064OR | 165 | Illumina MiSeq | 0 | 292 | 292 | NA | saliva [ENVO:02000036] | 0 |
| MMPC-3103115-SA-0 | MMPC67978674OR | 165 | Illumina MiSeq | 0 | 292 | 292 | NA | saliva [ENVO:02000036] | 0 |
| MMPC-3103116-SA-0 | MMPC65303959OR | 165 | Illumina MiSeq | 0 | 292 | 292 | NA | saliva [ENVO:02000036] | 0 |
| MMPC-3103117-SA-0 | MMPC63118595OR | 165 | Illumina MiSeq | 0 | 292 | 292 | NA | saliva [ENVO:02000036] | 0 |
| MMPC-3103118-SA-0 | MMPC11179595OR | 165 | Illumina MiSeq | 0 | 292 | 292 | NA | saliva [ENVO:02000036] | 0 |
| MMPC-3103119-SA-0 | MMPC20954519OR | 165 | Illumina MiSeq | 0 | 292 | 292 | NA | saliva [ENVO:02000036] | 0 |
| MMPC-3103120-SA-0 | MMPC21775404OR | 165 | Illumina MiSeq | 0 | 292 | 292 | NA | saliva [ENVO:02000036] | 0 |
| MMPC-3103121-SA-0 | MMPC23514621OR | 165 | Illumina MiSeq | 0 | 292 | 292 | NA | saliva [ENVO:02000036] | 0 |
| MMPC-3103124-SA-0 | MMPC42192127OR | 165 | Illumina MiSeq | 0 | 292 | 292 | NA | saliva [ENVO:02000036] | 0 |
| MMPC-3103125-SA-0 | MMPC45339999OR | 165 | Illumina MiSeq | 0 | 292 | 292 | NA | saliva [ENVO:02000036] | 0 |
| MMPC-3103126-SA-0 | MMPC68048817OR | 165 | Illumina MiSeq | 0 | 292 | 292 | NA | saliva [ENVO:02000036] | 0 |
| MMPC-3103127-SA-0 | MMPC62601303OR | 165 | Illumina MiSeq | 0 | 292 | 292 | NA | saliva [ENVO:02000036] | 0 |
| MMPC-3103129-SA-0 | MMPC31367206OR | 165 | Illumina MiSeq | 0 | 292 | 292 | NA | saliva [ENVO:02000036] | 0 |
| MMPC-3103202-SA-0 | MMPC42991028OR | 165 | Illumina MiSeq | 0 | 292 | 292 | NA | saliva [ENVO:02000036] | 0 |
| MMPC-3103203-SA-0 | MMPC74059481OR | 165 | Illumina MiSeq | 0 | 292 | 292 | NA | saliva [ENVO:02000036] | 0 |
| MMPC-3103206-SA-0 | MMPC74490281OR | 165 | Illumina MiSeq | 0 | 292 | 292 | NA | saliva [ENVO:02000036] | 0 |
| MMPC-3103207-SA-0 | MMPC53231545OR | 165 | Illumina MiSeq | 0 | 292 | 292 | NA | saliva [ENVO:02000036] | 0 |
| MMPC-3103208-SA-0 | MMPC48136943OR | 165 | Illumina MiSeq | 0 | 292 | 292 | NA | saliva [ENVO:02000036] | 0 |
| MMPC-3103209-SA-0 | MMPC20195220OR | 165 | Illumina MiSeq | 0 | 292 | 292 | NA | saliva [ENVO:02000036] | 0 |
| MMPC-3103211-SA-0 | MMPC45318061OR | 165 | Illumina MiSeq | 0 | 292 | 292 | NA | saliva [ENVO:02000036] | 0 |
| MMPC-3103212-SA-0 | MMPC37399343OR | 165 | Illumina MiSeq | 0 | 292 | 292 | NA | saliva [ENVO:02000036] | 0 |
| MMPC-3103214-SA-0 | MMPC38394840OR | 165 | Illumina MiSeq | 0 | 292 | 292 | NA | saliva [ENVO:02000036] | 0 |
| MMPC-3103215-SA-0 | MMPC84970403OR | 165 | Illumina MiSeq | 0 | 292 | 292 | NA | saliva [ENVO:02000036] | 0 |
| MMPC-3103216-SA-0 | MMPC56379457OR | 165 | Illumina MiSeq | 0 | 292 | 292 | NA | saliva [ENVO:02000036] | 0 |
| MMPC-3103217-SA-0 | MMPC40967934OR | 165 | Illumina MiSeq | 0 | 292 | 292 | NA | saliva [ENVO:02000036] | 0 |
| MMPC-3103218-SA-0 | MMPC73927114OR | 165 | Illumina MiSeq | 0 | 292 | 292 | NA | saliva [ENVO:02000036] | 0 |
| MMPC-3103219-SA-0 | MMPC97872292OR | 165 | Illumina MiSeq | 0 | 292 | 292 | NA | saliva [ENVO:02000036] | 0 |
| MMPC-3103220-SA-0 | MMPC68758730OR | 165 | Illumina MiSeq | 0 | 292 | 292 | NA | saliva [ENVO:02000036] | 0 |
| MMPC-3103221-SA-0 | MMPC54458294OR | 165 | Illumina MiSeq | 0 | 292 | 292 | NA | saliva [ENVO:02000036] | 0 |
| MMPC-3103223-SA-0 | MMPC55525481OR | 165 | Illumina MiSeq | 0 | 292 | 292 | NA | saliva [ENVO:02000036] | 0 |
| MMPC-3103224-SA-0 | MMPC90470189OR | 165 | Illumina MiSeq | 0 | 292 | 292 | NA | saliva [ENVO:02000036] | 0 |
| MMPC-3103225-SA-0 | MMPC85390604OR | 165 | Illumina MiSeq | 0 | 292 | 292 | NA | saliva [ENVO:02000036] | 0 |
| MMPC-3103226-SA-0 | MMPC87516576OR | 165 | Illumina MiSeq | 0 | 292 | 292 | NA | saliva [ENVO:02000036] | 0 |
| MMPC-3103227-SA-0 | MMPC50847145OR | 165 | Illumina MiSeq | 0 | 292 | 292 | NA | saliva [ENVO:02000036] | 0 |
| MMPC-3103228-SA-0 | MMPC24608714OR | 165 | Illumina MiSeq | 0 | 292 | 292 | NA | saliva [ENVO:02000036] | 0 |
| MMPC-3103229-SA-0 | MMPC58829082OR | 165 | Illumina MiSeq | 0 | 292 | 292 | NA | saliva [ENVO:02000036] | 0 |
| MMPC-3103302-SA-0 | MMPC63553475OR | 165 | Illumina MiSeq | 0 | 292 | 292 | NA | saliva [ENVO:02000036] | 0 |
| MMPC-3103303-SA-0 | MMPC27266285OR | 165 | Illumina MiSeq | 0 | 292 | 292 | NA | saliva [ENVO:02000036] | 0 |
| MMPC-3103306-SA-0 | MMPC85705244OR | 165 | Illumina MiSeq | 0 | 292 | 292 | NA | saliva [ENVO:02000036] | 0 |
| MMPC-3103307-SA-0 | MMPC57892266OR | 165 | Illumina MiSeq | 0 | 292 | 292 | NA | saliva [ENVO:02000036] | 0 |
| MMPC-3103308-SA-0 | MMPC58558599OR | 165 | Illumina MiSeq | 0 | 292 | 292 | NA | saliva [ENVO:02000036] | 0 |
| MMPC-3103309-SA-0 | MMPC55133623OR | 165 | Illumina MiSeq | 0 | 292 | 292 | NA | saliva [ENVO:02000036] | 0 |
| MMPC-3103311-SA-0 | MMPC37416843OR | 165 | Illumina MiSeq | 0 | 292 | 292 | NA | saliva [ENVO:02000036] | 0 |
| MMPC-3103312-SA-0 | MMPC50998073OR | 165 | Illumina MiSeq | 0 | 292 | 292 | NA | saliva [ENVO:02000036] | 0 |
| MMPC-3103314-SA-0 | MMPC35036620OR | 165 | Illumina MiSeq | 0 | 292 | 292 | NA | saliva [ENVO:02000036] | 0 |
| MMPC-3103315-SA-0 | MMPC79959139OR | 165 | Illumina MiSeq | 0 | 292 | 292 | NA | saliva [ENVO:02000036] | 0 |
| MMPC-3103316-SA-0 | MMPC65969751OR | 165 | Illumina MiSeq | 0 | 292 | 292 | NA | saliva [ENVO:02000036] | 0 |
| MMPC-3103317-SA-0 | MMPC85634415OR | 165 | Illumina MiSeq | 0 | 292 | 292 | NA | saliva [ENVO:02000036] | 0 |
| MMPC-3103318-SA-0 | MMPC93112149OR | 165 | Illumina MiSeq | 0 | 292 | 292 | NA | saliva [ENVO:02000036] | 0 |
| MMPC-3103319-SA-0 | MMPC12461225OR | 165 | Illumina MiSeq | 0 | 292 | 292 | NA | saliva [ENVO:02000036] | 0 |

|                   |                |     |                |   |     |     |    |                        |   |
|-------------------|----------------|-----|----------------|---|-----|-----|----|------------------------|---|
| MMPC-3103320-SA-0 | MMPC34498596OR | 165 | Illumina MiSeq | 0 | 292 | 292 | NA | saliva [ENVO:02000036] | 0 |
| MMPC-3103321-SA-0 | MMP56325888OR  | 165 | Illumina MiSeq | 0 | 292 | 292 | NA | saliva [ENVO:02000036] | 0 |
| MMPC-3103324-SA-0 | MMP99338054OR  | 165 | Illumina MiSeq | 0 | 292 | 292 | NA | saliva [ENVO:02000036] | 0 |
| MMPC-3103325-SA-0 | MMP96167252OR  | 165 | Illumina MiSeq | 0 | 292 | 292 | NA | saliva [ENVO:02000036] | 0 |
| MMPC-3103326-SA-0 | MMP55035531OR  | 165 | Illumina MiSeq | 0 | 292 | 292 | NA | saliva [ENVO:02000036] | 0 |
| MMPC-3103327-SA-0 | MMP81837161OR  | 165 | Illumina MiSeq | 0 | 292 | 292 | NA | saliva [ENVO:02000036] | 0 |
| MMPC-3103329-SA-0 | MMP42646817OR  | 165 | Illumina MiSeq | 0 | 292 | 292 | NA | saliva [ENVO:02000036] | 0 |
| MMPC-3103330-SA-0 | MMP16231550OR  | 165 | Illumina MiSeq | 0 | 292 | 292 | NA | saliva [ENVO:02000036] | 0 |
| MMPC-3109101-SA-0 | MMP91896521OR  | 165 | Illumina MiSeq | 0 | 292 | 292 | NA | saliva [ENVO:02000036] | 0 |
| MMPC-3109102-SA-0 | MMP91354261OR  | 165 | Illumina MiSeq | 0 | 292 | 292 | NA | saliva [ENVO:02000036] | 0 |
| MMPC-3109103-SA-0 | MMP49489785OR  | 165 | Illumina MiSeq | 0 | 292 | 292 | NA | saliva [ENVO:02000036] | 0 |
| MMPC-3109104-SA-0 | MMP78236242OR  | 165 | Illumina MiSeq | 0 | 292 | 292 | NA | saliva [ENVO:02000036] | 0 |
| MMPC-3109105-SA-0 | MMP46123748OR  | 165 | Illumina MiSeq | 0 | 292 | 292 | NA | saliva [ENVO:02000036] | 0 |
| MMPC-3109106-SA-0 | MMP95372332OR  | 165 | Illumina MiSeq | 0 | 292 | 292 | NA | saliva [ENVO:02000036] | 0 |
| MMPC-3109107-SA-0 | MMP42247540OR  | 165 | Illumina MiSeq | 0 | 292 | 292 | NA | saliva [ENVO:02000036] | 0 |
| MMPC-3109108-SA-0 | MMP22594900OR  | 165 | Illumina MiSeq | 0 | 292 | 292 | NA | saliva [ENVO:02000036] | 0 |
| MMPC-3109109-SA-0 | MMP42369256OR  | 165 | Illumina MiSeq | 0 | 292 | 292 | NA | saliva [ENVO:02000036] | 0 |
| MMPC-3109110-SA-0 | MMP52559088OR  | 165 | Illumina MiSeq | 0 | 292 | 292 | NA | saliva [ENVO:02000036] | 0 |
| MMPC-3109111-SA-0 | MMP48186797OR  | 165 | Illumina MiSeq | 0 | 292 | 292 | NA | saliva [ENVO:02000036] | 0 |
| MMPC-3109112-SA-0 | MMP35162108OR  | 165 | Illumina MiSeq | 0 | 292 | 292 | NA | saliva [ENVO:02000036] | 0 |
| MMPC-3109113-SA-0 | MMP77190173OR  | 165 | Illumina MiSeq | 0 | 292 | 292 | NA | saliva [ENVO:02000036] | 0 |
| MMPC-3109114-SA-0 | MMP91664155OR  | 165 | Illumina MiSeq | 0 | 292 | 292 | NA | saliva [ENVO:02000036] | 0 |
| MMPC-3109115-SA-0 | MMP86145124OR  | 165 | Illumina MiSeq | 0 | 292 | 292 | NA | saliva [ENVO:02000036] | 0 |
| MMPC-3109116-SA-0 | MMP28815814OR  | 165 | Illumina MiSeq | 0 | 292 | 292 | NA | saliva [ENVO:02000036] | 0 |
| MMPC-3109117-SA-0 | MMP55730016OR  | 165 | Illumina MiSeq | 0 | 292 | 292 | NA | saliva [ENVO:02000036] | 0 |
| MMPC-3109118-SA-0 | MMP73361074OR  | 165 | Illumina MiSeq | 0 | 292 | 292 | NA | saliva [ENVO:02000036] | 0 |
| MMPC-3109119-SA-0 | MMP90908289OR  | 165 | Illumina MiSeq | 0 | 292 | 292 | NA | saliva [ENVO:02000036] | 0 |
| MMPC-3109120-SA-0 | MMP34568026OR  | 165 | Illumina MiSeq | 0 | 292 | 292 | NA | saliva [ENVO:02000036] | 0 |
| MMPC-3109121-SA-0 | MMP91033830OR  | 165 | Illumina MiSeq | 0 | 292 | 292 | NA | saliva [ENVO:02000036] | 0 |
| MMPC-3109122-SA-0 | MMP75634766OR  | 165 | Illumina MiSeq | 0 | 292 | 292 | NA | saliva [ENVO:02000036] | 0 |
| MMPC-3109123-SA-0 | MMP78765773OR  | 165 | Illumina MiSeq | 0 | 292 | 292 | NA | saliva [ENVO:02000036] | 0 |
| MMPC-3109124-SA-0 | MMP42978442OR  | 165 | Illumina MiSeq | 0 | 292 | 292 | NA | saliva [ENVO:02000036] | 0 |
| MMPC-3109125-SA-0 | MMP13169976OR  | 165 | Illumina MiSeq | 0 | 292 | 292 | NA | saliva [ENVO:02000036] | 0 |
| MMPC-3109126-SA-0 | MMP21250627OR  | 165 | Illumina MiSeq | 0 | 292 | 292 | NA | saliva [ENVO:02000036] | 0 |
| MMPC-3109127-SA-0 | MMP89348908OR  | 165 | Illumina MiSeq | 0 | 292 | 292 | NA | saliva [ENVO:02000036] | 0 |
| MMPC-3109128-SA-0 | MMP41437470OR  | 165 | Illumina MiSeq | 0 | 292 | 292 | NA | saliva [ENVO:02000036] | 0 |
| MMPC-3109129-SA-0 | MMP68946435OR  | 165 | Illumina MiSeq | 0 | 292 | 292 | NA | saliva [ENVO:02000036] | 0 |
| MMPC-3109130-SA-0 | MMP10578010OR  | 165 | Illumina MiSeq | 0 | 292 | 292 | NA | saliva [ENVO:02000036] | 0 |
| MMPC-3109132-SA-0 | MMP58837755OR  | 165 | Illumina MiSeq | 0 | 292 | 292 | NA | saliva [ENVO:02000036] | 0 |
| MMPC-3109134-SA-0 | MMP42441792OR  | 165 | Illumina MiSeq | 0 | 292 | 292 | NA | saliva [ENVO:02000036] | 0 |
| MMPC-3109135-SA-0 | MMP88095540OR  | 165 | Illumina MiSeq | 0 | 292 | 292 | NA | saliva [ENVO:02000036] | 0 |
| MMPC-3109136-SA-0 | MMP67321556OR  | 165 | Illumina MiSeq | 0 | 292 | 292 | NA | saliva [ENVO:02000036] | 0 |
| MMPC-3109137-SA-0 | MMP25056624OR  | 165 | Illumina MiSeq | 0 | 292 | 292 | NA | saliva [ENVO:02000036] | 0 |
| MMPC-3109138-SA-0 | MMP29668362OR  | 165 | Illumina MiSeq | 0 | 292 | 292 | NA | saliva [ENVO:02000036] | 0 |
| MMPC-3109139-SA-0 | MMP80846477OR  | 165 | Illumina MiSeq | 0 | 292 | 292 | NA | saliva [ENVO:02000036] | 0 |
| MMPC-3109140-SA-0 | MMP92702195OR  | 165 | Illumina MiSeq | 0 | 292 | 292 | NA | saliva [ENVO:02000036] | 0 |
| MMPC-3109141-SA-0 | MMP42107863OR  | 165 | Illumina MiSeq | 0 | 292 | 292 | NA | saliva [ENVO:02000036] | 0 |
| MMPC-3109201-SA-0 | MMP85802458OR  | 165 | Illumina MiSeq | 0 | 292 | 292 | NA | saliva [ENVO:02000036] | 0 |
| MMPC-3109202-SA-0 | MMP27037046OR  | 165 | Illumina MiSeq | 0 | 292 | 292 | NA | saliva [ENVO:02000036] | 0 |
| MMPC-3109203-SA-0 | MMP42326903OR  | 165 | Illumina MiSeq | 0 | 292 | 292 | NA | saliva [ENVO:02000036] | 0 |
| MMPC-3109204-SA-0 | MMP96578111OR  | 165 | Illumina MiSeq | 0 | 292 | 292 | NA | saliva [ENVO:02000036] | 0 |
| MMPC-3109205-SA-0 | MMP67377108OR  | 165 | Illumina MiSeq | 0 | 292 | 292 | NA | saliva [ENVO:02000036] | 0 |
| MMPC-3109206-SA-0 | MMP24821675OR  | 165 | Illumina MiSeq | 0 | 292 | 292 | NA | saliva [ENVO:02000036] | 0 |
| MMPC-3109207-SA-0 | MMP60572150OR  | 165 | Illumina MiSeq | 0 | 292 | 292 | NA | saliva [ENVO:02000036] | 0 |
| MMPC-3109208-SA-0 | MMP27025376OR  | 165 | Illumina MiSeq | 0 | 292 | 292 | NA | saliva [ENVO:02000036] | 0 |
| MMPC-3109208-SA-0 | MMP62405084OR  | 165 | Illumina MiSeq | 0 | 292 | 292 | NA | saliva [ENVO:02000036] | 0 |
| MMPC-3109209-SA-0 | MMP19177783OR  | 165 | Illumina MiSeq | 0 | 292 | 292 | NA | saliva [ENVO:02000036] | 0 |
| MMPC-3109210-SA-0 | MMP24845793OR  | 165 | Illumina MiSeq | 0 | 292 | 292 | NA | saliva [ENVO:02000036] | 0 |
| MMPC-3109210-SA-0 | MMP47372291OR  | 165 | Illumina MiSeq | 0 | 292 | 292 | NA | saliva [ENVO:02000036] | 0 |
| MMPC-3109211-SA-0 | MMP89522066OR  | 165 | Illumina MiSeq | 0 | 292 | 292 | NA | saliva [ENVO:02000036] | 0 |
| MMPC-3109212-SA-0 | MMP73773857OR  | 165 | Illumina MiSeq | 0 | 292 | 292 | NA | saliva [ENVO:02000036] | 0 |
| MMPC-3109213-SA-0 | MMP37783467OR  | 165 | Illumina MiSeq | 0 | 292 | 292 | NA | saliva [ENVO:02000036] | 0 |
| MMPC-3109214-SA-0 | MMP39636267OR  | 165 | Illumina MiSeq | 0 | 292 | 292 | NA | saliva [ENVO:02000036] | 0 |
| MMPC-3109215-SA-0 | MMP40536708OR  | 165 | Illumina MiSeq | 0 | 292 | 292 | NA | saliva [ENVO:02000036] | 0 |
| MMPC-3109216-SA-0 | MMP43503506OR  | 165 | Illumina MiSeq | 0 | 292 | 292 | NA | saliva [ENVO:02000036] | 0 |
| MMPC-3109217-SA-0 | MMP22439119OR  | 165 | Illumina MiSeq | 0 | 292 | 292 | NA | saliva [ENVO:02000036] | 0 |
| MMPC-3109218-SA-0 | MMP93571858OR  | 165 | Illumina MiSeq | 0 | 292 | 292 | NA | saliva [ENVO:02000036] | 0 |
| MMPC-3109219-SA-0 | MMP45008410OR  | 165 | Illumina MiSeq | 0 | 292 | 292 | NA | saliva [ENVO:02000036] | 0 |
| MMPC-3109220-SA-0 | MMP29277640OR  | 165 | Illumina MiSeq | 0 | 292 | 292 | NA | saliva [ENVO:02000036] | 0 |
| MMPC-3109221-SA-0 | MMP32291597OR  | 165 | Illumina MiSeq | 0 | 292 | 292 | NA | saliva [ENVO:02000036] | 0 |
| MMPC-3109222-SA-1 | MMP99658636OR  | 165 | Illumina MiSeq | 0 | 292 | 292 | NA | saliva [ENVO:02000036] | 1 |
| MMPC-3109222-SA-1 | MMP13427371OR  | 165 | Illumina MiSeq | 0 | 292 | 292 | NA | saliva [ENVO:02000036] | 1 |
| MMPC-3109223-SA-0 | MMP48873249OR  | 165 | Illumina MiSeq | 0 | 292 | 292 | NA | saliva [ENVO:02000036] | 0 |
| MMPC-3109225-SA-0 | MMP37580697OR  | 165 | Illumina MiSeq | 0 | 292 | 292 | NA | saliva [ENVO:02000036] | 0 |
| MMPC-3109226-SA-0 | MMP61992937OR  | 165 | Illumina MiSeq | 0 | 292 | 292 | NA | saliva [ENVO:02000036] | 0 |
| MMPC-3109227-SA-0 | MMP67918047OR  | 165 | Illumina MiSeq | 0 | 292 | 292 | NA | saliva [ENVO:02000036] | 0 |
| MMPC-3109228-SA-0 | MMP35478733OR  | 165 | Illumina MiSeq | 0 | 292 | 292 | NA | saliva [ENVO:02000036] | 0 |
| MMPC-3109232-SA-0 | MMP54640065OR  | 165 | Illumina MiSeq | 0 | 292 | 292 | NA | saliva [ENVO:02000036] | 0 |
| MMPC-3109233-SA-0 | MMP94081974OR  | 165 | Illumina MiSeq | 0 | 292 | 292 | NA | saliva [ENVO:02000036] | 0 |
| MMPC-3109234-SA-0 | MMP29658279OR  | 165 | Illumina MiSeq | 0 | 292 | 292 | NA | saliva [ENVO:02000036] | 0 |
| MMPC-3109236-SA-0 | MMP40797909OR  | 165 | Illumina MiSeq | 0 | 292 | 292 | NA | saliva [ENVO:02000036] | 0 |
| MMPC-3109237-SA-0 | MMP47432795OR  | 165 | Illumina MiSeq | 0 | 292 | 292 | NA | saliva [ENVO:02000036] | 0 |
| MMPC-3109238-SA-0 | MMP81538982OR  | 165 | Illumina MiSeq | 0 | 292 | 292 | NA | saliva [ENVO:02000036] | 0 |
| MMPC-3109301-SA-0 | MMP62882996OR  | 165 | Illumina MiSeq | 0 | 292 | 292 | NA | saliva [ENVO:02000036] | 0 |
| MMPC-3109305-SA-0 | MMP59454227OR  | 165 | Illumina MiSeq | 0 | 292 | 292 | NA | saliva [ENVO:02000036] | 0 |
| MMPC-3109305-SA-0 | MMP63021713OR  | 165 | Illumina MiSeq | 0 | 292 | 292 | NA | saliva [ENVO:02000036] | 0 |
| MMPC-3109306-SA-0 | MMP33663665OR  | 165 | Illumina MiSeq | 0 | 292 | 292 | NA | saliva [ENVO:02000036] | 0 |
| MMPC-3109315-SA-0 | MMP59175809OR  | 165 | Illumina MiSeq | 0 | 292 | 292 | NA | saliva [ENVO:02000036] | 0 |
| MMPC-3109319-SA-0 | MMP52031211OR  | 165 | Illumina MiSeq | 0 | 292 | 292 | NA | saliva [ENVO:02000036] | 0 |
| MMPC-3109324-SA-0 | MMP11599193OR  | 165 | Illumina MiSeq | 0 | 292 | 292 | NA | saliva [ENVO:02000036] | 0 |

|                      |                |     |                |   |     |     |        |                             |   |
|----------------------|----------------|-----|----------------|---|-----|-----|--------|-----------------------------|---|
| MMPC-3103102123-TU-0 | MMPC52294238TU | 165 | Illumina MiSeq | 0 | 292 | 292 | 16762  | pancreas [UBERON:0001264]   | 0 |
| MMPC-3103102125-HT-0 | MMPC96437096HT | 165 | Illumina MiSeq | 0 | 292 | 292 | 118983 | pancreas [UBERON:0001264]   | 0 |
| MMPC-3103106123-TU-0 | MMPC22271503TU | 165 | Illumina MiSeq | 0 | 292 | 292 | 27346  | pancreas [UBERON:0001264]   | 0 |
| MMPC-3103107123-TU-0 | MMPC87955180TU | 165 | Illumina MiSeq | 0 | 292 | 292 | 50932  | pancreas [UBERON:0001264]   | 0 |
| MMPC-3103108123-TU-0 | MMPC54922715TU | 165 | Illumina MiSeq | 0 | 292 | 292 | 31245  | pancreas [UBERON:0001264]   | 0 |
| MMPC-3103108125-HT-0 | MMPC24466339HT | 165 | Illumina MiSeq | 0 | 292 | 292 | 127835 | pancreas [UBERON:0001264]   | 0 |
| MMPC-3103111125-HT-0 | MMPC80734101HT | 165 | Illumina MiSeq | 0 | 292 | 292 | 95924  | pancreas [UBERON:0001264]   | 0 |
| MMPC-3103112123-TU-0 | MMPC83770412TU | 165 | Illumina MiSeq | 0 | 292 | 292 | 21764  | pancreas [UBERON:0001264]   | 0 |
| MMPC-3103112125-HT-0 | MMPC40334378HT | 165 | Illumina MiSeq | 0 | 292 | 292 | 91218  | pancreas [UBERON:0001264]   | 0 |
| MMPC-3103114123-TU-0 | MMPC48644619TU | 165 | Illumina MiSeq | 0 | 292 | 292 | 17849  | pancreas [UBERON:0001264]   | 0 |
| MMPC-3103114125-HT-0 | MMPC35209818HT | 165 | Illumina MiSeq | 0 | 292 | 292 | 114214 | pancreas [UBERON:0001264]   | 0 |
| MMPC-3103116123-TU-0 | MMPC75019385TU | 165 | Illumina MiSeq | 0 | 292 | 292 | 38264  | pancreas [UBERON:0001264]   | 0 |
| MMPC-3103116125-HT-0 | MMPC89754577HT | 165 | Illumina MiSeq | 0 | 292 | 292 | 84488  | pancreas [UBERON:0001264]   | 0 |
| MMPC-3103116125-HT-c | MMPC76929964HT | 165 | Illumina MiSeq | 0 | 292 | 292 | 99306  | pancreas [UBERON:0001264]   | 0 |
| MMPC-3103118123-TU-0 | MMPC53213093TU | 165 | Illumina MiSeq | 0 | 292 | 292 | 19403  | pancreas [UBERON:0001264]   | 0 |
| MMPC-3103119123-TU-0 | MMPC77465766TU | 165 | Illumina MiSeq | 0 | 292 | 292 | 35083  | pancreas [UBERON:0001264]   | 0 |
| MMPC-3103119123-TU-c | MMPC24078588TU | 165 | Illumina MiSeq | 0 | 292 | 292 | 71331  | pancreas [UBERON:0001264]   | 0 |
| MMPC-3103119125-HT-0 | MMPC37714156HT | 165 | Illumina MiSeq | 0 | 292 | 292 | 85195  | pancreas [UBERON:0001264]   | 0 |
| MMPC-3103119125-HT-c | MMPC49102349HT | 165 | Illumina MiSeq | 0 | 292 | 292 | 111138 | pancreas [UBERON:0001264]   | 0 |
| MMPC-3103120125-HT-0 | MMPC36983914HT | 165 | Illumina MiSeq | 0 | 292 | 292 | 73461  | pancreas [UBERON:0001264]   | 0 |
| MMPC-3103121123-TU-0 | MMPC90323932TU | 165 | Illumina MiSeq | 0 | 292 | 292 | 32825  | pancreas [UBERON:0001264]   | 0 |
| MMPC-3103121123-TU-c | MMPC58485046TU | 165 | Illumina MiSeq | 0 | 292 | 292 | 140836 | pancreas [UBERON:0001264]   | 0 |
| MMPC-3103125123-TU-0 | MMPC49164313TU | 165 | Illumina MiSeq | 0 | 292 | 292 | 50097  | pancreas [UBERON:0001264]   | 0 |
| MMPC-3103125127-HT-0 | MMPC86673187HT | 165 | Illumina MiSeq | 0 | 292 | 292 | 96102  | pancreas [UBERON:0001264]   | 0 |
| MMPC-3103129123-TU-0 | MMPC80997236TU | 165 | Illumina MiSeq | 0 | 292 | 292 | 64881  | pancreas [UBERON:0001264]   | 0 |
| MMPC-3103129125-HT-0 | MMPC49203482HT | 165 | Illumina MiSeq | 0 | 292 | 292 | 110366 | pancreas [UBERON:0001264]   | 0 |
| MMPC-3103302125-HT-0 | MMPC25083626HT | 165 | Illumina MiSeq | 0 | 292 | 292 | 87920  | pancreas [UBERON:0001264]   | 0 |
| MMPC-3103302127-HT-0 | MMPC02321546HT | 165 | Illumina MiSeq | 0 | 292 | 292 | 94815  | ncreatic duct [UBERON:00073 | 0 |
| MMPC-3103307123-TU-0 | MMPC84306689TU | 165 | Illumina MiSeq | 0 | 292 | 292 | 35125  | pancreas [UBERON:0001264]   | 0 |
| MMPC-3103307123-TU-c | MMPC63721423TU | 165 | Illumina MiSeq | 0 | 292 | 292 | 101573 | pancreas [UBERON:0001264]   | 0 |
| MMPC-3103307125-HT-0 | MMPC74146850HT | 165 | Illumina MiSeq | 0 | 292 | 292 | 87273  | pancreas [UBERON:0001264]   | 0 |
| MMPC-3103309123-TU-0 | MMPC53390762TU | 165 | Illumina MiSeq | 0 | 292 | 292 | 25942  | pancreas [UBERON:0001264]   | 0 |
| MMPC-3103309125-HT-0 | MMPC33872709HT | 165 | Illumina MiSeq | 0 | 292 | 292 | 93994  | pancreas [UBERON:0001264]   | 0 |
| MMPC-3103330125-HT-0 | MMPC35081045HT | 165 | Illumina MiSeq | 0 | 292 | 292 | 75059  | pancreas [UBERON:0001264]   | 0 |
| MMPC-3109101123-TU-0 | MMPC82234530TU | 165 | Illumina MiSeq | 0 | 292 | 292 | 63990  | pancreas [UBERON:0001264]   | 0 |
| MMPC-3109102123-TU-0 | MMPC26308927TU | 165 | Illumina MiSeq | 0 | 292 | 292 | 63118  | pancreas [UBERON:0001264]   | 0 |
| MMPC-3109102125-HT-0 | MMPC83100372HT | 165 | Illumina MiSeq | 0 | 292 | 292 | 97384  | pancreas [UBERON:0001264]   | 0 |
| MMPC-3109103123-TU-0 | MMPC79418921TU | 165 | Illumina MiSeq | 0 | 292 | 292 | 92173  | pancreas [UBERON:0001264]   | 0 |
| MMPC-3109105123-TU-0 | MMPC96387591TU | 165 | Illumina MiSeq | 0 | 292 | 292 | 86922  | pancreas [UBERON:0001264]   | 0 |
| MMPC-3109105125-HT-0 | MMPC33126922HT | 165 | Illumina MiSeq | 0 | 292 | 292 | 96057  | pancreas [UBERON:0001264]   | 0 |
| MMPC-3109107123-TU-0 | MMPC80047993TU | 165 | Illumina MiSeq | 0 | 292 | 292 | 78692  | pancreas [UBERON:0001264]   | 0 |
| MMPC-3109107125-HT-0 | MMPC65170291HT | 165 | Illumina MiSeq | 0 | 292 | 292 | 66822  | pancreas [UBERON:0001264]   | 0 |
| MMPC-3109111123-TU-0 | MMPC23067667TU | 165 | Illumina MiSeq | 0 | 292 | 292 | 8      | pancreas [UBERON:0001264]   | 0 |
| MMPC-3109111125-HT-0 | MMPC80978814HT | 165 | Illumina MiSeq | 0 | 292 | 292 | 150064 | pancreas [UBERON:0001264]   | 0 |
| MMPC-3109111125-HT-c | MMPC42159796HT | 165 | Illumina MiSeq | 0 | 292 | 292 | 116464 | pancreas [UBERON:0001264]   | 0 |
| MMPC-3109113123-TU-0 | MMPC42025082TU | 165 | Illumina MiSeq | 0 | 292 | 292 | 91603  | pancreas [UBERON:0001264]   | 0 |
| MMPC-3109113125-HT-0 | MMPC93630826HT | 165 | Illumina MiSeq | 0 | 292 | 292 | 93581  | pancreas [UBERON:0001264]   | 0 |
| MMPC-3109117123-TU-0 | MMPC44512561TU | 165 | Illumina MiSeq | 0 | 292 | 292 | 101695 | pancreas [UBERON:0001264]   | 0 |
| MMPC-3109117125-HT-0 | MMPC58544120HT | 165 | Illumina MiSeq | 0 | 292 | 292 | 76970  | pancreas [UBERON:0001264]   | 0 |
| MMPC-3109117127-HT-0 | MMPC66546739HT | 165 | Illumina MiSeq | 0 | 292 | 292 | 72952  | ncreatic duct [UBERON:00073 | 0 |
| MMPC-3109140123-TU-0 | MMPC57986041TU | 165 | Illumina MiSeq | 0 | 292 | 292 | 137586 | pancreas [UBERON:0001264]   | 0 |

| gender | age_years | collection_datct | disease_s    | tax_id | smoker     | center | alcohol_statu: | alldiab | diabcat | obese | panctype | asthma | allacid |
|--------|-----------|------------------|--------------|--------|------------|--------|----------------|---------|---------|-------|----------|--------|---------|
| male   | 79        | 2015-2018        | PC           | 408170 | smoker     | 2      | 0              | 0       | 0       | 0     | 0        | 0      | 0       |
| male   | 62        | 2015-2018        | PC           | 408170 | ex-smoker  | 2      | 1              | 0       | 0       | 0     | 0        | 0      | 0       |
| female | 69        | 2015-2018        | PC           | 408170 | smoker     | 2      | 0              | 0       | 0       | 0     | 0        | 0      | 1       |
| male   | 54        | 2015-2018        | PC           | 408170 | non-smoker | 2      | 1              | 0       | 0       | 0     | 0        | 0      | 0       |
| male   | 54        | 2015-2018        | PC           | 408170 | non-smoker | 2      | 1              | 0       | 0       | 0     | 0        | 0      | 0       |
| female | 68        | 2015-2018        | PC           | 408170 | non-smoker | 2      | 1              | 0       | 0       | NA    | 0        | 0      | 0       |
| male   | 68        | 2015-2018        | PC           | 408170 | ex-smoker  | 2      | 1              | 1       | 1       | 0     | 0        | 0      | 0       |
| male   | 68        | 2015-2018        | PC           | 408170 | ex-smoker  | 2      | 1              | 1       | 1       | 0     | 0        | 0      | 0       |
| male   | 71        | 2015-2018        | PC           | 408170 | non-smoker | 2      | 0              | 0       | 0       | 0     | 0        | 0      | 0       |
| male   | 84        | 2015-2018        | PC           | 408170 | non-smoker | 2      | 1              | 1       | 1       | 0     | 0        | 0      | 0       |
| male   | 84        | 2015-2018        | PC           | 408170 | non-smoker | 2      | 1              | 1       | 1       | 0     | 0        | 0      | 0       |
| female | 69        | 2015-2018        | PC           | 408170 | non-smoker | 2      | 0              | 0       | 0       | 0     | 0        | 1      | 1       |
| male   | 66        | 2015-2018        | PC           | 408170 | smoker     | 2      | 1              | 0       | 0       | 0     | 0        | 0      | 1       |
| male   | 82        | 2015-2018        | PC           | 408170 | ex-smoker  | 2      | 1              | 1       | 2       | 0     | 0        | 0      | 0       |
| male   | 82        | 2015-2018        | PC           | 408170 | ex-smoker  | 2      | 1              | 1       | 2       | 0     | 0        | 0      | 0       |
| male   | 70        | 2015-2018        | PC           | 408170 | non-smoker | 2      | 1              | 1       | 2       | 1     | 0        | 0      | 0       |
| male   | 70        | 2015-2018        | PC           | 408170 | non-smoker | 2      | 1              | 1       | 2       | 1     | 0        | 0      | 0       |
| male   | 60        | 2015-2018        | PC           | 408170 | smoker     | 2      | 1              | 0       | 0       | 0     | 2        | 0      | 0       |
| male   | 63        | 2015-2018        | PC           | 408170 | ex-smoker  | 2      | 1              | 0       | 0       | 1     | 0        | 0      | 0       |
| male   | 45        | 2015-2018        | PC           | 408170 | ex-smoker  | 2      | 1              | 0       | 0       | 0     | NA       | 1      | 0       |
| female | 73        | 2015-2018        | PC           | 408170 | non-smoker | 2      | 1              | 0       | 0       | 1     | 0        | 0      | 0       |
| female | 67        | 2015-2018        | PC           | 408170 | non-smoker | 2      | 0              | 0       | 0       | 0     | 0        | 0      | 0       |
| female | 67        | 2015-2018        | PC           | 408170 | non-smoker | 2      | 0              | 0       | 0       | 0     | 0        | 0      | 0       |
| male   | 66        | 2015-2018        | PC           | 408170 | non-smoker | 2      | 0              | 1       | 2       | 0     | 0        | 0      | 0       |
| male   | 68        | 2015-2018        | PC           | 408170 | smoker     | 2      | 1              | 1       | 1       | 0     | 0        | 0      | 0       |
| male   | 52        | 2015-2018        | PC           | 408170 | smoker     | 2      | 1              | 0       | 0       | 1     | 0        | 0      | 1       |
| male   | 68        | 2015-2018        | PC           | 408170 | non-smoker | 2      | 1              | 0       | 0       | 0     | 0        | 0      | 0       |
| male   | 83        | 2015-2018        | CTR          | 408170 | ex-smoker  | 2      | 1              | 0       | 0       | NA    | 0        | 0      | 0       |
| male   | 57        | 2015-2018        | CTR          | 408170 | non-smoker | 2      | 1              | 0       | 0       | 0     | 0        | 0      | 0       |
| male   | 57        | 2015-2018        | CTR          | 408170 | non-smoker | 2      | 1              | 0       | 0       | 0     | 0        | 0      | 0       |
| female | 70        | 2015-2018        | CTR          | 408170 | non-smoker | 2      | 0              | 0       | 0       | 0     | 1        | 0      | 1       |
| male   | 54        | 2015-2018        | CTR          | 408170 | non-smoker | 2      | 1              | 0       | 0       | 0     | 0        | 0      | 0       |
| female | 72        | 2015-2018        | CTR          | 408170 | smoker     | 2      | 1              | 0       | 0       | 0     | 0        | 0      | 0       |
| male   | 76        | 2015-2018        | Pancreatitis | 408170 | ex-smoker  | 2      | 1              | 1       | 2       | 1     | 2        | 0      | 0       |
| male   | 67        | 2015-2018        | CTR          | 408170 | non-smoker | 2      | 1              | 1       | 2       | 0     | 0        | 0      | 0       |
| male   | 67        | 2015-2018        | CTR          | 408170 | non-smoker | 2      | 1              | 1       | 2       | 0     | 0        | 0      | 0       |
| male   | 82        | 2015-2018        | CTR          | 408170 | non-smoker | 2      | 0              | 0       | 0       | 0     | 0        | 0      | 0       |
| female | 64        | 2015-2018        | CTR          | 408170 | non-smoker | 2      | 1              | 0       | 0       | 0     | 0        | 0      | 0       |
| male   | 63        | 2015-2018        | CTR          | 408170 | ex-smoker  | 2      | 1              | 0       | 0       | 0     | 0        | 0      | 1       |
| male   | 84        | 2015-2018        | CTR          | 408170 | ex-smoker  | 2      | 1              | 1       | 2       | 1     | 0        | 0      | 0       |
| male   | 61        | 2015-2018        | CTR          | 408170 | smoker     | 2      | 1              | 0       | 0       | 0     | 0        | 0      | 0       |
| male   | 53        | 2015-2018        | CTR          | 408170 | ex-smoker  | 2      | 1              | 0       | 0       | 0     | 0        | 0      | 0       |
| male   | 57        | 2015-2018        | CTR          | 408170 | non-smoker | 2      | 1              | 0       | 0       | 1     | 0        | 0      | 1       |
| male   | 38        | 2015-2018        | CTR          | 408170 | ex-smoker  | 2      | 1              | 0       | 0       | 0     | 0        | 0      | 0       |
| female | 68        | 2015-2018        | CTR          | 408170 | ex-smoker  | 2      | 1              | 0       | 0       | 0     | 0        | 0      | 0       |
| female | 81        | 2015-2018        | CTR          | 408170 | non-smoker | 2      | 1              | 0       | 0       | 0     | 0        | 0      | 1       |
| female | 65        | 2015-2018        | CTR          | 408170 | non-smoker | 2      | 1              | 0       | 0       | 0     | 0        | 0      | 0       |
| male   | 61        | 2015-2018        | CTR          | 408170 | non-smoker | 2      | 0              | 0       | 0       | 0     | 0        | 0      | 0       |
| male   | 59        | 2015-2018        | CTR          | 408170 | ex-smoker  | 2      | 1              | 0       | 0       | 1     | 0        | 0      | 0       |
| male   | 56        | 2015-2018        | CTR          | 408170 | smoker     | 2      | 1              | 0       | 0       | 0     | 0        | 0      | 0       |
| male   | 63        | 2015-2018        | CTR          | 408170 | smoker     | 2      | 1              | 0       | 0       | 0     | 0        | 0      | 1       |
| male   | 63        | 2015-2018        | CTR          | 408170 | smoker     | 2      | 1              | 0       | 0       | 0     | 0        | 0      | 0       |
| male   | 79        | 2015-2018        | Pancreatitis | 408170 | ex-smoker  | 2      | 1              | 1       | 2       | 0     | 2        | 0      | 0       |
| male   | 64        | 2015-2018        | Pancreatitis | 408170 | smoker     | 2      | 1              | 1       | 2       | 0     | 2        | 0      | 0       |
| female | 62        | 2015-2018        | Pancreatitis | 408170 | ex-smoker  | 2      | 1              | 1       | 2       | 1     | 2        | 1      | 0       |
| male   | 54        | 2015-2018        | Pancreatitis | 408170 | smoker     | 2      | 1              | 0       | 0       | 0     | 2        | 0      | 0       |
| female | 58        | 2015-2018        | Pancreatitis | 408170 | smoker     | 2      | 1              | 1       | 1       | 0     | 2        | 0      | 1       |
| male   | 58        | 2015-2018        | Pancreatitis | 408170 | smoker     | 2      | 1              | 0       | 0       | 0     | 2        | 0      | 0       |
| male   | 67        | 2015-2018        | Pancreatitis | 408170 | smoker     | 2      | 1              | 0       | 0       | 0     | 2        | 0      | 0       |
| male   | 76        | 2015-2018        | Pancreatitis | 408170 | ex-smoker  | 2      | 1              | 1       | 2       | 0     | 2        | 0      | 0       |
| female | 72        | 2015-2018        | Pancreatitis | 408170 | ex-smoker  | 2      | 1              | 1       | 2       | 0     | 2        | 0      | 0       |
| male   | 58        | 2015-2018        | Pancreatitis | 408170 | smoker     | 2      | 1              | 1       | 2       | 1     | 2        | 0      | 0       |
| male   | 78        | 2015-2018        | Pancreatitis | 408170 | ex-smoker  | 2      | 1              | 1       | 2       | 0     | 2        | 0      | 0       |
| male   | 60        | 2015-2018        | Pancreatitis | 408170 | ex-smoker  | 2      | 1              | 1       | 2       | 0     | 2        | 0      | 1       |
| male   | 58        | 2015-2018        | Pancreatitis | 408170 | smoker     | 2      | 1              | 1       | 2       | 0     | 2        | 0      | 0       |
| male   | 64        | 2015-2018        | Pancreatitis | 408170 | ex-smoker  | 2      | 1              | 1       | 1       | 1     | 2        | 0      | 1       |
| male   | 64        | 2015-2018        | Pancreatitis | 408170 | ex-smoker  | 2      | 1              | 1       | 1       | 1     | 2        | 0      | 1       |
| male   | 45        | 2015-2018        | Pancreatitis | 408170 | ex-smoker  | 2      | 1              | 0       | 0       | 0     | 2        | 0      | 1       |
| female | 83        | 2015-2018        | Pancreatitis | 408170 | smoker     | 2      | 0              | 1       | 2       | 0     | 2        | 0      | 0       |
| female | 71        | 2015-2018        | Pancreatitis | 408170 | non-smoker | 2      | 0              | 0       | 0       | 0     | 2        | 1      | 0       |
| male   | 64        | 2015-2018        | Pancreatitis | 408170 | smoker     | 2      | 1              | 1       | 2       | 0     | 2        | 0      | 0       |
| male   | 61        | 2015-2018        | Pancreatitis | 408170 | smoker     | 2      | 1              | 1       | 2       | 0     | 2        | 0      | 0       |
| male   | 55        | 2015-2018        | Pancreatitis | 408170 | smoker     | 2      | 1              | 1       | 2       | 0     | 2        | 0      | 0       |
| male   | 62        | 2015-2018        | Pancreatitis | 408170 | smoker     | 2      | 1              | 1       | 2       | 0     | 2        | 0      | 0       |
| female | 55        | 2015-2018        | Pancreatitis | 408170 | smoker     | 2      | 1              | 0       | 0       | 1     | 2        | 0      | 0       |
| female | 78        | 2015-2018        | PC           | 408170 | non-smoker | 8      | 0              | 0       | 0       | 0     | 0        | 0      | 0       |
| female | 78        | 2015-2018        | PC           | 408170 | non-smoker | 8      | 0              | 0       | 0       | 0     | 0        | 0      | 0       |
| female | 67        | 2015-2018        | PC           | 408170 | smoker     | 8      | 0              | 0       | 0       | 0     | 0        | 1      | 1       |
| female | 74        | 2015-2018        | PC           | 408170 | non-smoker | 8      | 0              | 0       | 0       | 0     | 0        | 0      | 0       |
| female | 74        | 2015-2018        | PC           | 408170 | non-smoker | 8      | 0              | 0       | 0       | 0     | 0        | 0      | 0       |
| male   | 85        | 2015-2018        | PC           | 408170 | ex-smoker  | 8      | 0              | 0       | 0       | 0     | 0        | 0      | 0       |
| female | 71        | 2015-2018        | PC           | 408170 | non-smoker | 8      | 0              | 1       | 1       | 1     | 0        | 0      | 1       |
| female | 68        | 2015-2018        | PC           | 408170 | non-smoker | 8      | 1              | 1       | 1       | 0     | 0        | 0      | 0       |
| female | 81        | 2015-2018        | PC           | 408170 | non-smoker | 8      | 1              | 1       | 1       | 1     | 0        | 0      | 0       |
| male   | 86        | 2015-2018        | PC           | 408170 | ex-smoker  | 8      | 1              | 0       | 0       | 0     | 0        | 0      | 0       |
| female | 71        | 2015-2018        | PC           | 408170 | non-smoker | 8      | 1              | 0       | 0       | 0     | 0        | 0      | 1       |
| male   | 85        | 2015-2018        | PC           | 408170 | ex-smoker  | 8      | 1              | 1       | 2       | 0     | 0        | 0      | 0       |
| male   | 85        | 2015-2018        | PC           | 408170 | ex-smoker  | 8      | 1              | 0       | 0       | 0     | 0        | 0      | 1       |



|        |    |           |              |         |            |   |   |    |    |    |    |   |   |
|--------|----|-----------|--------------|---------|------------|---|---|----|----|----|----|---|---|
| female | 84 | 2015-2018 | PC           | 408170  | non-smoker | 8 | 1 | 1  | 1  | 1  | 0  | 0 | 1 |
| male   | 74 | 2015-2018 | PC           | 408170  | non-smoker | 8 | 1 | 0  | 0  | 1  | 0  | 0 | 1 |
| male   | 88 | 2015-2018 | PC           | 408170  | ex-smoker  | 8 | 1 | 0  | 0  | 0  | 0  | 0 | 1 |
| female | 79 | 2015-2018 | PC           | 408170  | non-smoker | 8 | 0 | 0  | 0  | 0  | 0  | 0 | 1 |
| female | 79 | 2015-2018 | PC           | 408170  | non-smoker | 8 | 0 | 0  | 0  | 0  | 0  | 0 | 1 |
| male   | 80 | 2015-2018 | PC           | 408170  | non-smoker | 8 | 1 | 1  | 2  | 0  | 0  | 0 | 1 |
| male   | 49 | 2015-2018 | PC           | 408170  | non-smoker | 8 | 0 | 0  | 0  | 0  | 0  | 1 | 1 |
| male   | 79 | 2015-2018 | PC           | 408170  | smoker     | 8 | 1 | 0  | 0  | 0  | 0  | 0 | 0 |
| female | 80 | 2015-2018 | PC           | 408170  | non-smoker | 8 | 0 | 0  | 0  | 0  | 0  | 0 | 0 |
| male   | 86 | 2015-2018 | PC           | 408170  | NA         | 8 | 1 | 0  | 0  | 1  | 0  | 0 | 0 |
| male   | 86 | 2015-2018 | PC           | 408170  | NA         | 8 | 1 | 0  | 0  | 1  | 0  | 0 | 0 |
| male   | 70 | 2015-2018 | PC           | 408170  | ex-smoker  | 8 | 1 | 0  | 0  | 0  | 0  | 0 | 0 |
| female | 85 | 2015-2018 | PC           | 408170  | non-smoker | 8 | 1 | 0  | 0  | 1  | 0  | 0 | 0 |
| female | 71 | 2015-2018 | PC           | 408170  | non-smoker | 8 | 1 | 0  | 0  | 0  | 0  | 0 | 0 |
| male   | 67 | 2015-2018 | PC           | 408170  | ex-smoker  | 8 | 1 | 0  | 0  | 0  | 0  | 0 | 0 |
| male   | 69 | 2015-2018 | PC           | 408170  | ex-smoker  | 8 | 1 | 1  | 2  | 1  | 0  | 0 | 0 |
| female | 75 | 2015-2018 | PC           | 408170  | non-smoker | 8 | 0 | 0  | 0  | 0  | 0  | 0 | 0 |
| female | 79 | 2015-2018 | PC           | 408170  | non-smoker | 8 | 0 | 0  | 0  | 1  | 0  | 0 | 0 |
| female | 74 | 2015-2018 | PC           | 408170  | non-smoker | 8 | 0 | 0  | 0  | 0  | 0  | 0 | 0 |
| male   | 62 | 2015-2018 | PC           | 408170  | ex-smoker  | 8 | 1 | 1  | 2  | 0  | 1  | 0 | 1 |
| male   | 83 | 2015-2018 | PC           | 408170  | ex-smoker  | 8 | 1 | 1  | 2  | 0  | 0  | 0 | 0 |
| female | 65 | 2015-2018 | PC           | 408170  | ex-smoker  | 8 | 1 | 0  | 0  | 0  | 0  | 0 | 0 |
| male   | 56 | 2015-2018 | PC           | 408170  | ex-smoker  | 8 | 1 | 0  | 0  | 1  | 0  | 0 | 1 |
| male   | 78 | 2015-2018 | PC           | 408170  | ex-smoker  | 8 | 1 | 0  | 0  | 1  | 0  | 0 | 0 |
| male   | 45 | 2015-2018 | PC           | 408170  | smoker     | 8 | 1 | 0  | 0  | 1  | 0  | 0 | 1 |
| male   | 81 | 2015-2018 | PC           | 408170  | non-smoker | 8 | 1 | 1  | 2  | 1  | 0  | 0 | 0 |
| male   | 64 | 2015-2018 | PC           | 408170  | smoker     | 8 | 1 | 1  | 1  | 0  | 0  | 0 | 0 |
| female | 88 | 2015-2018 | CTR          | 408170  | non-smoker | 8 | 1 | 0  | 0  | NA | 0  | 0 | 0 |
| female | 80 | 2015-2018 | CTR          | 408170  | non-smoker | 8 | 0 | 1  | 2  | 1  | 0  | 1 | 1 |
| male   | 88 | 2015-2018 | CTR          | 408170  | ex-smoker  | 8 | 1 | 0  | 0  | 0  | 0  | 0 | 0 |
| female | 79 | 2015-2018 | CTR          | 408170  | non-smoker | 8 | 1 | 0  | 0  | 1  | 0  | 0 | 0 |
| female | 59 | 2015-2018 | CTR          | 408170  | non-smoker | 8 | 0 | 0  | 0  | 1  | 0  | 0 | 0 |
| male   | 91 | 2015-2018 | CTR          | 408170  | non-smoker | 8 | 1 | 0  | 0  | 0  | 0  | 0 | 1 |
| female | 62 | 2015-2018 | CTR          | 408170  | non-smoker | 8 | 1 | 0  | 0  | 0  | 0  | 0 | 0 |
| male   | 81 | 2015-2018 | CTR          | 408170  | ex-smoker  | 8 | 1 | 1  | 2  | 0  | 0  | 0 | 0 |
| male   | 81 | 2015-2018 | CTR          | 408170  | ex-smoker  | 8 | 1 | 0  | 0  | 0  | 0  | 0 | 1 |
| female | 76 | 2015-2018 | CTR          | 408170  | non-smoker | 8 | 0 | 0  | 0  | 0  | 0  | 0 | 0 |
| male   | 71 | 2015-2018 | CTR          | 408170  | non-smoker | 8 | 1 | 0  | 0  | 1  | 0  | 0 | 0 |
| male   | 93 | 2015-2018 | CTR          | 408170  | smoker     | 8 | 1 | 0  | 0  | 1  | 0  | 1 | 0 |
| female | 85 | 2015-2018 | CTR          | 408170  | smoker     | 8 | 0 | 0  | 0  | 0  | 0  | 0 | 0 |
| male   | 72 | 2015-2018 | CTR          | 408170  | smoker     | 8 | 1 | 0  | 0  | 1  | 0  | 0 | 0 |
| male   | 49 | 2015-2018 | CTR          | 408170  | non-smoker | 8 | 1 | 0  | 0  | 0  | 0  | 0 | 1 |
| female | 87 | 2015-2018 | CTR          | 408170  | non-smoker | 8 | 0 | 1  | 2  | 1  | 0  | 0 | 0 |
| male   | 87 | 2015-2018 | CTR          | 408170  | ex-smoker  | 8 | 1 | 0  | 0  | 0  | 0  | 0 | 0 |
| male   | 78 | 2015-2018 | CTR          | 408170  | smoker     | 8 | 1 | 0  | 0  | 1  | 0  | 0 | 0 |
| male   | 78 | 2015-2018 | CTR          | 408170  | smoker     | 8 | 1 | 0  | 0  | 1  | 0  | 0 | 0 |
| female | 88 | 2015-2018 | CTR          | 408170  | non-smoker | 8 | 0 | 0  | 0  | 0  | 0  | 0 | 0 |
| female | 69 | 2015-2018 | CTR          | 408170  | ex-smoker  | 8 | 1 | 0  | 0  | 0  | 0  | 0 | 0 |
| male   | 73 | 2015-2018 | CTR          | 408170  | ex-smoker  | 8 | 1 | 0  | 0  | 0  | 0  | 0 | 0 |
| male   | 77 | 2015-2018 | CTR          | 408170  | non-smoker | 8 | 1 | 0  | 0  | 0  | 0  | 0 | 0 |
| female | 85 | 2015-2018 | CTR          | 408170  | non-smoker | 8 | 0 | 0  | 0  | 0  | 0  | 0 | 0 |
| female | 89 | 2015-2018 | CTR          | 408170  | non-smoker | 8 | 1 | NA | NA | 0  | 0  | 1 | 0 |
| male   | 69 | 2015-2018 | CTR          | 408170  | ex-smoker  | 8 | 1 | 0  | 0  | 1  | 0  | 0 | 1 |
| female | 58 | 2015-2018 | CTR          | 408170  | ex-smoker  | 8 | 1 | 0  | 0  | 0  | 0  | 0 | 0 |
| male   | 59 | 2015-2018 | CTR          | 408170  | ex-smoker  | 8 | 0 | 0  | 0  | 0  | 0  | 0 | 0 |
| male   | 71 | 2015-2018 | CTR          | 408170  | smoker     | 8 | 1 | 0  | 0  | 1  | 0  | 1 | 0 |
| female | 77 | 2015-2018 | Pancreatitis | 408170  | non-smoker | 8 | 1 | 0  | 0  | 0  | 2  | 0 | 1 |
| female | 51 | 2015-2018 | Pancreatitis | 408170  | ex-smoker  | 8 | 1 | 0  | 0  | 0  | 2  | 0 | 1 |
| female | 56 | 2015-2018 | Pancreatitis | 408170  | non-smoker | 8 | 1 | 0  | 0  | 0  | 2  | 0 | 1 |
| male   | 74 | 2015-2018 | Pancreatitis | 408170  | ex-smoker  | 8 | 1 | 0  | 0  | 1  | 2  | 0 | 0 |
| male   | 54 | 2015-2018 | Pancreatitis | 408170  | non-smoker | 8 | 1 | 1  | 2  | 0  | 2  | 0 | 0 |
| male   | 68 | 2015-2018 | Pancreatitis | 408170  | smoker     | 8 | 0 | 1  | 2  | 1  | 2  | 0 | 0 |
| male   | 79 | 2015-2018 | PC           | 1679718 | smoker     | 2 | 0 | 0  | 0  | 0  | 0  | 0 | 0 |
| male   | 62 | 2015-2018 | PC           | 1679718 | ex-smoker  | 2 | 1 | 0  | 0  | 0  | 0  | 0 | 0 |
| female | 69 | 2015-2018 | PC           | 1679718 | smoker     | 2 | 0 | 0  | 0  | 0  | 0  | 0 | 1 |
| male   | 54 | 2015-2018 | PC           | 1679718 | non-smoker | 2 | 1 | 0  | 0  | 0  | 0  | 0 | 0 |
| female | 68 | 2015-2018 | PC           | 1679718 | non-smoker | 2 | 1 | 0  | 0  | NA | 0  | 0 | 0 |
| male   | 68 | 2015-2018 | PC           | 1679718 | ex-smoker  | 2 | 1 | 1  | 1  | 0  | 0  | 0 | 0 |
| male   | 71 | 2015-2018 | PC           | 1679718 | non-smoker | 2 | 0 | 0  | 0  | 0  | 0  | 0 | 0 |
| male   | 84 | 2015-2018 | PC           | 1679718 | non-smoker | 2 | 1 | 1  | 1  | 0  | 0  | 0 | 0 |
| female | 69 | 2015-2018 | PC           | 1679718 | non-smoker | 2 | 0 | 0  | 0  | 0  | 0  | 1 | 1 |
| male   | 66 | 2015-2018 | PC           | 1679718 | smoker     | 2 | 1 | 0  | 0  | 0  | 0  | 0 | 1 |
| male   | 82 | 2015-2018 | PC           | 1679718 | ex-smoker  | 2 | 1 | 1  | 2  | 0  | 0  | 0 | 0 |
| male   | 70 | 2015-2018 | PC           | 1679718 | non-smoker | 2 | 1 | 1  | 2  | 1  | 0  | 0 | 0 |
| male   | 60 | 2015-2018 | PC           | 1679718 | smoker     | 2 | 1 | 0  | 0  | 0  | 2  | 0 | 0 |
| male   | 63 | 2015-2018 | PC           | 1679718 | ex-smoker  | 2 | 1 | 0  | 0  | 1  | 0  | 0 | 0 |
| male   | 45 | 2015-2018 | PC           | 1679718 | ex-smoker  | 2 | 1 | 0  | 0  | 0  | NA | 1 | 0 |
| female | 73 | 2015-2018 | PC           | 1679718 | non-smoker | 2 | 1 | 0  | 0  | 1  | 0  | 0 | 0 |
| female | 67 | 2015-2018 | PC           | 1679718 | non-smoker | 2 | 0 | 0  | 0  | 0  | 0  | 0 | 0 |
| male   | 66 | 2015-2018 | PC           | 1679718 | non-smoker | 2 | 0 | 1  | 2  | 0  | 0  | 0 | 0 |
| male   | 68 | 2015-2018 | PC           | 1679718 | smoker     | 2 | 1 | 1  | 1  | 0  | 0  | 0 | 0 |
| male   | 52 | 2015-2018 | PC           | 1679718 | smoker     | 2 | 1 | 0  | 0  | 1  | 0  | 0 | 1 |
| male   | 68 | 2015-2018 | PC           | 1679718 | non-smoker | 2 | 1 | 0  | 0  | 0  | 0  | 0 | 0 |
| male   | 83 | 2015-2018 | CTR          | 1679718 | ex-smoker  | 2 | 1 | 0  | 0  | NA | 0  | 0 | 0 |
| male   | 57 | 2015-2018 | CTR          | 1679718 | non-smoker | 2 | 1 | 0  | 0  | 0  | 0  | 0 | 0 |
| female | 70 | 2015-2018 | CTR          | 1679718 | non-smoker | 2 | 0 | 0  | 0  | 0  | 1  | 0 | 1 |
| male   | 54 | 2015-2018 | CTR          | 1679718 | non-smoker | 2 | 1 | 0  | 0  | 0  | 0  | 0 | 0 |
| female | 72 | 2015-2018 | CTR          | 1679718 | smoker     | 2 | 1 | 0  | 0  | 0  | 0  | 0 | 0 |
| male   | 76 | 2015-2018 | Pancreatitis | 1679718 | ex-smoker  | 2 | 1 | 1  | 2  | 1  | 2  | 0 | 0 |
| male   | 67 | 2015-2018 | CTR          | 1679718 | non-smoker | 2 | 1 | 1  | 2  | 0  | 0  | 0 | 0 |

|        |    |           |              |         |            |   |   |    |   |    |   |   |   |
|--------|----|-----------|--------------|---------|------------|---|---|----|---|----|---|---|---|
| male   | 82 | 2015-2018 | CTR          | 1679718 | non-smoker | 2 | 0 | 0  | 0 | 0  | 0 | 0 | 0 |
| female | 64 | 2015-2018 | CTR          | 1679718 | non-smoker | 2 | 1 | 0  | 0 | 0  | 0 | 0 | 0 |
| male   | 63 | 2015-2018 | CTR          | 1679718 | ex-smoker  | 2 | 1 | 0  | 0 | 0  | 0 | 0 | 1 |
| male   | 84 | 2015-2018 | CTR          | 1679718 | ex-smoker  | 2 | 1 | 1  | 2 | 1  | 0 | 0 | 0 |
| male   | 61 | 2015-2018 | CTR          | 1679718 | smoker     | 2 | 1 | 0  | 0 | 0  | 0 | 0 | 0 |
| male   | 53 | 2015-2018 | CTR          | 1679718 | ex-smoker  | 2 | 1 | 0  | 0 | 0  | 0 | 0 | 0 |
| male   | 57 | 2015-2018 | CTR          | 1679718 | non-smoker | 2 | 1 | 0  | 0 | 1  | 0 | 0 | 1 |
| male   | 38 | 2015-2018 | CTR          | 1679718 | ex-smoker  | 2 | 1 | 0  | 0 | 0  | 0 | 0 | 0 |
| female | 68 | 2015-2018 | CTR          | 1679718 | ex-smoker  | 2 | 1 | 0  | 0 | 0  | 0 | 0 | 0 |
| female | 81 | 2015-2018 | CTR          | 1679718 | non-smoker | 2 | 1 | 0  | 0 | 0  | 0 | 0 | 1 |
| female | 65 | 2015-2018 | CTR          | 1679718 | non-smoker | 2 | 1 | 0  | 0 | 0  | 0 | 0 | 0 |
| male   | 61 | 2015-2018 | CTR          | 1679718 | non-smoker | 2 | 0 | 0  | 0 | 0  | 0 | 0 | 0 |
| male   | 59 | 2015-2018 | CTR          | 1679718 | ex-smoker  | 2 | 1 | 0  | 0 | 1  | 0 | 0 | 0 |
| male   | 56 | 2015-2018 | CTR          | 1679718 | smoker     | 2 | 1 | 0  | 0 | 0  | 0 | 0 | 0 |
| male   | 63 | 2015-2018 | CTR          | 1679718 | smoker     | 2 | 1 | 0  | 0 | 0  | 0 | 0 | 1 |
| male   | 63 | 2015-2018 | CTR          | 1679718 | smoker     | 2 | 1 | 0  | 0 | 0  | 0 | 0 | 0 |
| male   | 79 | 2015-2018 | Pancreatitis | 1679718 | ex-smoker  | 2 | 1 | 1  | 2 | 0  | 2 | 0 | 0 |
| male   | 64 | 2015-2018 | Pancreatitis | 1679718 | smoker     | 2 | 1 | 1  | 2 | 0  | 2 | 0 | 0 |
| male   | 54 | 2015-2018 | Pancreatitis | 1679718 | smoker     | 2 | 1 | 0  | 0 | 0  | 2 | 0 | 0 |
| male   | 58 | 2015-2018 | Pancreatitis | 1679718 | smoker     | 2 | 1 | 0  | 0 | 0  | 2 | 0 | 0 |
| male   | 58 | 2015-2018 | Pancreatitis | 1679718 | smoker     | 2 | 1 | 1  | 2 | 1  | 2 | 0 | 0 |
| male   | 58 | 2015-2018 | Pancreatitis | 1679718 | smoker     | 2 | 1 | 1  | 2 | 0  | 2 | 0 | 0 |
| male   | 64 | 2015-2018 | Pancreatitis | 1679718 | ex-smoker  | 2 | 1 | 1  | 1 | 1  | 2 | 0 | 1 |
| female | 55 | 2015-2018 | Pancreatitis | 1679718 | smoker     | 2 | 1 | 0  | 0 | 1  | 2 | 0 | 0 |
| female | 78 | 2015-2018 | PC           | 1679718 | non-smoker | 8 | 0 | 0  | 0 | 0  | 0 | 0 | 0 |
| female | 67 | 2015-2018 | PC           | 1679718 | smoker     | 8 | 0 | 0  | 0 | 0  | 0 | 1 | 1 |
| female | 74 | 2015-2018 | PC           | 1679718 | non-smoker | 8 | 0 | 0  | 0 | 0  | 0 | 0 | 0 |
| male   | 85 | 2015-2018 | PC           | 1679718 | ex-smoker  | 8 | 0 | 0  | 0 | 0  | 0 | 0 | 0 |
| female | 71 | 2015-2018 | PC           | 1679718 | non-smoker | 8 | 0 | 1  | 1 | 1  | 0 | 0 | 1 |
| female | 68 | 2015-2018 | PC           | 1679718 | non-smoker | 8 | 1 | 1  | 1 | 0  | 0 | 0 | 0 |
| female | 81 | 2015-2018 | PC           | 1679718 | ex-smoker  | 8 | 0 | 1  | 2 | 1  | 0 | 0 | 0 |
| female | 81 | 2015-2018 | PC           | 1679718 | non-smoker | 8 | 1 | 1  | 1 | 1  | 0 | 0 | 0 |
| male   | 86 | 2015-2018 | PC           | 1679718 | ex-smoker  | 8 | 1 | 0  | 0 | 0  | 0 | 0 | 0 |
| female | 71 | 2015-2018 | PC           | 1679718 | non-smoker | 8 | 1 | 0  | 0 | 0  | 0 | 0 | 1 |
| male   | 85 | 2015-2018 | PC           | 1679718 | ex-smoker  | 8 | 1 | 1  | 2 | 0  | 0 | 0 | 0 |
| male   | 85 | 2015-2018 | PC           | 1679718 | ex-smoker  | 8 | 1 | 0  | 0 | 0  | 0 | 0 | 1 |
| female | 78 | 2015-2018 | PC           | 1679718 | non-smoker | 8 | 0 | 0  | 0 | 1  | 0 | 0 | 0 |
| female | 84 | 2015-2018 | PC           | 1679718 | non-smoker | 8 | 1 | 1  | 1 | 1  | 0 | 0 | 1 |
| male   | 74 | 2015-2018 | PC           | 1679718 | non-smoker | 8 | 1 | 0  | 0 | 1  | 0 | 0 | 1 |
| male   | 88 | 2015-2018 | PC           | 1679718 | ex-smoker  | 8 | 1 | 0  | 0 | 0  | 0 | 0 | 1 |
| female | 79 | 2015-2018 | PC           | 1679718 | non-smoker | 8 | 0 | 0  | 0 | 0  | 0 | 0 | 1 |
| male   | 80 | 2015-2018 | PC           | 1679718 | non-smoker | 8 | 1 | 1  | 2 | 0  | 0 | 0 | 1 |
| male   | 49 | 2015-2018 | PC           | 1679718 | non-smoker | 8 | 0 | 0  | 0 | 0  | 0 | 1 | 1 |
| female | 80 | 2015-2018 | PC           | 1679718 | non-smoker | 8 | 0 | 0  | 0 | 0  | 0 | 0 | 0 |
| male   | 81 | 2015-2018 | PC           | 1679718 | non-smoker | 8 | 0 | 0  | 0 | 0  | 0 | 0 | 0 |
| male   | 86 | 2015-2018 | PC           | 1679718 | NA         | 8 | 1 | 0  | 0 | 1  | 0 | 0 | 0 |
| female | 88 | 2015-2018 | CTR          | 1679718 | non-smoker | 8 | 1 | 0  | 0 | NA | 0 | 0 | 0 |
| female | 68 | 2015-2018 | CTR          | 1679718 | ex-smoker  | 8 | 1 | 0  | 0 | 0  | 0 | 0 | 0 |
| female | 80 | 2015-2018 | CTR          | 1679718 | non-smoker | 8 | 0 | 1  | 2 | 1  | 0 | 1 | 1 |
| male   | 88 | 2015-2018 | CTR          | 1679718 | ex-smoker  | 8 | 1 | 0  | 0 | 0  | 0 | 0 | 0 |
| female | 79 | 2015-2018 | CTR          | 1679718 | non-smoker | 8 | 1 | 0  | 0 | 1  | 0 | 0 | 0 |
| female | 59 | 2015-2018 | CTR          | 1679718 | non-smoker | 8 | 0 | 0  | 0 | 1  | 0 | 0 | 0 |
| female | 77 | 2015-2018 | CTR          | 1679718 | non-smoker | 8 | 1 | 0  | 0 | 1  | 0 | 0 | 0 |
| female | 84 | 2015-2018 | CTR          | 1679718 | non-smoker | 8 | 0 | 0  | 0 | 0  | 0 | 0 | 0 |
| female | 84 | 2015-2018 | CTR          | 1679718 | non-smoker | 8 | 0 | 0  | 0 | 0  | 0 | 0 | 0 |
| male   | 91 | 2015-2018 | CTR          | 1679718 | non-smoker | 8 | 1 | 0  | 0 | 0  | 0 | 0 | 1 |
| female | 62 | 2015-2018 | CTR          | 1679718 | non-smoker | 8 | 1 | 0  | 0 | 0  | 0 | 0 | 0 |
| female | 62 | 2015-2018 | CTR          | 1679718 | non-smoker | 8 | 1 | 0  | 0 | 0  | 0 | 0 | 0 |
| male   | 81 | 2015-2018 | CTR          | 1679718 | ex-smoker  | 8 | 1 | 1  | 2 | 0  | 0 | 0 | 0 |
| male   | 81 | 2015-2018 | CTR          | 1679718 | ex-smoker  | 8 | 1 | 0  | 0 | 0  | 0 | 0 | 1 |
| female | 76 | 2015-2018 | CTR          | 1679718 | non-smoker | 8 | 0 | 0  | 0 | 0  | 0 | 0 | 0 |
| female | 78 | 2015-2018 | CTR          | 1679718 | non-smoker | 8 | 0 | 1  | 2 | 0  | 0 | 0 | 1 |
| male   | 71 | 2015-2018 | CTR          | 1679718 | non-smoker | 8 | 1 | 0  | 0 | 1  | 0 | 0 | 0 |
| male   | 93 | 2015-2018 | CTR          | 1679718 | smoker     | 8 | 1 | 0  | 0 | 1  | 0 | 1 | 0 |
| female | 85 | 2015-2018 | CTR          | 1679718 | smoker     | 8 | 0 | 0  | 0 | 0  | 0 | 0 | 0 |
| male   | 72 | 2015-2018 | CTR          | 1679718 | smoker     | 8 | 1 | 0  | 0 | 1  | 0 | 0 | 0 |
| male   | 49 | 2015-2018 | CTR          | 1679718 | non-smoker | 8 | 1 | 0  | 0 | 0  | 0 | 0 | 1 |
| female | 78 | 2015-2018 | CTR          | 1679718 | smoker     | 8 | 1 | NA | 0 | 0  | 0 | 0 | 0 |
| female | 87 | 2015-2018 | CTR          | 1679718 | non-smoker | 8 | 0 | 1  | 2 | 1  | 0 | 0 | 0 |
| male   | 87 | 2015-2018 | CTR          | 1679718 | ex-smoker  | 8 | 1 | 0  | 0 | 0  | 0 | 0 | 0 |
| male   | 87 | 2015-2018 | CTR          | 1679718 | ex-smoker  | 8 | 1 | 0  | 0 | 0  | 0 | 0 | 0 |
| male   | 78 | 2015-2018 | CTR          | 1679718 | smoker     | 8 | 1 | 0  | 0 | 1  | 0 | 0 | 0 |
| female | 77 | 2015-2018 | Pancreatitis | 1679718 | non-smoker | 8 | 1 | 0  | 0 | 0  | 2 | 0 | 1 |
| male   | 74 | 2015-2018 | Pancreatitis | 1679718 | ex-smoker  | 8 | 1 | 0  | 0 | 1  | 2 | 0 | 0 |
| male   | 54 | 2015-2018 | Pancreatitis | 1679718 | non-smoker | 8 | 1 | 1  | 2 | 0  | 2 | 0 | 0 |
| female | 68 | 2015-2017 | PC           | 646099  | smoker     | 2 | 0 | 0  | 0 | 0  | 0 | 0 | 1 |
| male   | 54 | 2015-2017 | PC           | 646099  | non-smoker | 2 | 1 | 0  | 0 | 0  | 0 | 0 | 0 |
| female | 68 | 2015-2017 | PC           | 646099  | non-smoker | 2 | 1 | 0  | 0 | 1  | 0 | 0 | 0 |
| male   | 71 | 2015-2017 | PC           | 646099  | non-smoker | 2 | 0 | 0  | 0 | 0  | 0 | 0 | 0 |
| male   | 60 | 2015-2017 | PC           | 646099  | smoker     | 2 | 1 | 0  | 0 | 0  | 2 | 0 | 0 |
| male   | 63 | 2015-2017 | PC           | 646099  | ex-smoker  | 2 | 1 | 0  | 0 | 1  | 0 | 0 | 0 |
| male   | 63 | 2015-2017 | PC           | 646099  | ex-smoker  | 2 | 1 | 0  | 0 | 1  | 0 | 0 | 0 |
| male   | 45 | 2015-2017 | PC           | 646099  | ex-smoker  | 2 | 1 | 0  | 0 | 0  | 0 | 1 | 0 |
| male   | 45 | 2015-2017 | PC           | 646099  | ex-smoker  | 2 | 1 | 0  | 0 | 0  | 0 | 1 | 0 |
| female | 73 | 2015-2017 | PC           | 646099  | non-smoker | 2 | 1 | 0  | 0 | 1  | 0 | 0 | 0 |
| male   | 66 | 2015-2017 | PC           | 646099  | non-smoker | 2 | 0 | 1  | 2 | 0  | 0 | 0 | 0 |
| male   | 68 | 2015-2017 | PC           | 646099  | non-smoker | 2 | 1 | 0  | 0 | 0  | 0 | 0 | 0 |
| male   | 79 | 2015-2017 | Pancreatitis | 646099  | ex-smoker  | 2 | 1 | 1  | 2 | 0  | 2 | 0 | 0 |
| male   | 54 | 2015-2017 | Pancreatitis | 646099  | NA         | 2 | 1 | 0  | 0 | 0  | 1 | 0 | 0 |
| male   | 54 | 2015-2017 | Pancreatitis | 646099  | NA         | 2 | 1 | 0  | 0 | 0  | 1 | 0 | 0 |

|        |    |           |              |        |            |   |   |   |   |    |    |   |   |
|--------|----|-----------|--------------|--------|------------|---|---|---|---|----|----|---|---|
| male   | 79 | 2015-2018 | PC           | 408170 | smoker     | 2 | 0 | 0 | 0 | 0  | 0  | 0 | 0 |
| male   | 62 | 2015-2018 | PC           | 408170 | ex-smoker  | 2 | 1 | 0 | 0 | 0  | 0  | 0 | 0 |
| female | 69 | 2015-2018 | PC           | 408170 | smoker     | 2 | 0 | 0 | 0 | 0  | 0  | 0 | 1 |
| male   | 54 | 2015-2018 | PC           | 408170 | non-smoker | 2 | 1 | 0 | 0 | 0  | 0  | 0 | 0 |
| female | 68 | 2015-2018 | PC           | 408170 | non-smoker | 2 | 1 | 0 | 0 | NA | 0  | 0 | 0 |
| male   | 68 | 2015-2018 | PC           | 408170 | ex-smoker  | 2 | 1 | 1 | 1 | 0  | 0  | 0 | 0 |
| male   | 71 | 2015-2018 | PC           | 408170 | non-smoker | 2 | 0 | 0 | 0 | 0  | 0  | 0 | 0 |
| male   | 84 | 2015-2018 | PC           | 408170 | non-smoker | 2 | 1 | 1 | 1 | 0  | 0  | 0 | 0 |
| female | 69 | 2015-2018 | PC           | 408170 | non-smoker | 2 | 0 | 0 | 0 | 0  | 0  | 1 | 1 |
| male   | 66 | 2015-2018 | PC           | 408170 | smoker     | 2 | 1 | 0 | 0 | 0  | 0  | 0 | 1 |
| male   | 82 | 2015-2018 | PC           | 408170 | ex-smoker  | 2 | 1 | 1 | 2 | 0  | 0  | 0 | 0 |
| male   | 70 | 2015-2018 | PC           | 408170 | non-smoker | 2 | 1 | 1 | 2 | 1  | 0  | 0 | 0 |
| male   | 60 | 2015-2018 | PC           | 408170 | smoker     | 2 | 1 | 0 | 0 | 0  | 2  | 0 | 0 |
| male   | 63 | 2015-2018 | PC           | 408170 | ex-smoker  | 2 | 1 | 0 | 0 | 1  | 0  | 0 | 0 |
| male   | 45 | 2015-2018 | PC           | 408170 | ex-smoker  | 2 | 1 | 0 | 0 | 0  | NA | 1 | 0 |
| female | 73 | 2015-2018 | PC           | 408170 | non-smoker | 2 | 1 | 0 | 0 | 1  | 0  | 0 | 0 |
| female | 67 | 2015-2018 | PC           | 408170 | non-smoker | 2 | 0 | 0 | 0 | 0  | 0  | 0 | 0 |
| male   | 66 | 2015-2018 | PC           | 408170 | non-smoker | 2 | 0 | 1 | 2 | 0  | 0  | 0 | 0 |
| male   | 68 | 2015-2018 | PC           | 408170 | smoker     | 2 | 1 | 1 | 1 | 0  | 0  | 0 | 0 |
| male   | 52 | 2015-2018 | PC           | 408170 | smoker     | 2 | 1 | 0 | 0 | 1  | 0  | 0 | 1 |
| male   | 68 | 2015-2018 | PC           | 408170 | non-smoker | 2 | 1 | 0 | 0 | 0  | 0  | 0 | 0 |
| male   | 83 | 2015-2018 | CTR          | 408170 | ex-smoker  | 2 | 1 | 0 | 0 | NA | 0  | 0 | 0 |
| male   | 57 | 2015-2018 | CTR          | 408170 | non-smoker | 2 | 1 | 0 | 0 | 0  | 0  | 0 | 0 |
| female | 70 | 2015-2018 | CTR          | 408170 | non-smoker | 2 | 0 | 0 | 0 | 0  | 1  | 0 | 1 |
| male   | 54 | 2015-2018 | CTR          | 408170 | non-smoker | 2 | 1 | 0 | 0 | 0  | 0  | 0 | 0 |
| female | 72 | 2015-2018 | CTR          | 408170 | smoker     | 2 | 1 | 0 | 0 | 0  | 0  | 0 | 0 |
| male   | 76 | 2015-2018 | Pancreatitis | 408170 | ex-smoker  | 2 | 1 | 1 | 2 | 1  | 2  | 0 | 0 |
| male   | 67 | 2015-2018 | CTR          | 408170 | non-smoker | 2 | 1 | 1 | 2 | 0  | 0  | 0 | 0 |
| male   | 82 | 2015-2018 | CTR          | 408170 | non-smoker | 2 | 0 | 0 | 0 | 0  | 0  | 0 | 0 |
| female | 64 | 2015-2018 | CTR          | 408170 | non-smoker | 2 | 1 | 0 | 0 | 0  | 0  | 0 | 0 |
| male   | 63 | 2015-2018 | CTR          | 408170 | ex-smoker  | 2 | 1 | 0 | 0 | 0  | 0  | 0 | 1 |
| male   | 84 | 2015-2018 | CTR          | 408170 | ex-smoker  | 2 | 1 | 1 | 2 | 1  | 0  | 0 | 0 |
| male   | 61 | 2015-2018 | CTR          | 408170 | smoker     | 2 | 1 | 0 | 0 | 0  | 0  | 0 | 0 |
| male   | 53 | 2015-2018 | CTR          | 408170 | ex-smoker  | 2 | 1 | 0 | 0 | 0  | 0  | 0 | 0 |
| male   | 57 | 2015-2018 | CTR          | 408170 | non-smoker | 2 | 1 | 0 | 0 | 1  | 0  | 0 | 1 |
| male   | 38 | 2015-2018 | CTR          | 408170 | ex-smoker  | 2 | 1 | 0 | 0 | 0  | 0  | 0 | 0 |
| female | 68 | 2015-2018 | CTR          | 408170 | ex-smoker  | 2 | 1 | 0 | 0 | 0  | 0  | 0 | 0 |
| female | 81 | 2015-2018 | CTR          | 408170 | non-smoker | 2 | 1 | 0 | 0 | 0  | 0  | 0 | 1 |
| female | 65 | 2015-2018 | CTR          | 408170 | non-smoker | 2 | 1 | 0 | 0 | 0  | 0  | 0 | 0 |
| male   | 61 | 2015-2018 | CTR          | 408170 | non-smoker | 2 | 0 | 0 | 0 | 0  | 0  | 0 | 0 |
| male   | 59 | 2015-2018 | CTR          | 408170 | ex-smoker  | 2 | 1 | 0 | 0 | 1  | 0  | 0 | 0 |
| male   | 56 | 2015-2018 | CTR          | 408170 | smoker     | 2 | 1 | 0 | 0 | 0  | 0  | 0 | 0 |
| male   | 63 | 2015-2018 | CTR          | 408170 | smoker     | 2 | 1 | 0 | 0 | 0  | 0  | 0 | 1 |
| male   | 63 | 2015-2018 | CTR          | 408170 | smoker     | 2 | 1 | 0 | 0 | 0  | 0  | 0 | 0 |
| male   | 79 | 2015-2018 | Pancreatitis | 408170 | ex-smoker  | 2 | 1 | 1 | 2 | 0  | 2  | 0 | 0 |
| male   | 64 | 2015-2018 | Pancreatitis | 408170 | smoker     | 2 | 1 | 1 | 2 | 0  | 2  | 0 | 0 |
| female | 62 | 2015-2018 | Pancreatitis | 408170 | ex-smoker  | 2 | 1 | 1 | 2 | 1  | 2  | 1 | 0 |
| male   | 54 | 2015-2018 | Pancreatitis | 408170 | smoker     | 2 | 1 | 0 | 0 | 0  | 2  | 0 | 0 |
| male   | 58 | 2015-2018 | Pancreatitis | 408170 | smoker     | 2 | 1 | 0 | 0 | 0  | 2  | 0 | 0 |
| male   | 67 | 2015-2018 | Pancreatitis | 408170 | smoker     | 2 | 1 | 0 | 0 | 0  | 2  | 0 | 0 |
| male   | 76 | 2015-2018 | Pancreatitis | 408170 | ex-smoker  | 2 | 1 | 1 | 2 | 0  | 2  | 0 | 0 |
| female | 72 | 2015-2018 | Pancreatitis | 408170 | ex-smoker  | 2 | 1 | 1 | 2 | 0  | 2  | 0 | 0 |
| male   | 58 | 2015-2018 | Pancreatitis | 408170 | smoker     | 2 | 1 | 1 | 2 | 1  | 2  | 0 | 0 |
| male   | 78 | 2015-2018 | Pancreatitis | 408170 | ex-smoker  | 2 | 1 | 1 | 2 | 0  | 2  | 0 | 0 |
| male   | 60 | 2015-2018 | Pancreatitis | 408170 | ex-smoker  | 2 | 1 | 1 | 2 | 0  | 2  | 0 | 1 |
| male   | 58 | 2015-2018 | Pancreatitis | 408170 | smoker     | 2 | 1 | 1 | 2 | 0  | 2  | 0 | 0 |
| male   | 64 | 2015-2018 | Pancreatitis | 408170 | ex-smoker  | 2 | 1 | 1 | 1 | 1  | 2  | 0 | 1 |
| male   | 64 | 2015-2018 | Pancreatitis | 408170 | ex-smoker  | 2 | 1 | 1 | 1 | 1  | 2  | 0 | 1 |
| female | 83 | 2015-2018 | Pancreatitis | 408170 | smoker     | 2 | 0 | 1 | 2 | 0  | 2  | 0 | 0 |
| female | 71 | 2015-2018 | Pancreatitis | 408170 | non-smoker | 2 | 0 | 0 | 0 | 0  | 2  | 1 | 0 |
| male   | 64 | 2015-2018 | Pancreatitis | 408170 | smoker     | 2 | 1 | 1 | 2 | 0  | 2  | 0 | 0 |
| male   | 61 | 2015-2018 | Pancreatitis | 408170 | smoker     | 2 | 1 | 1 | 2 | 0  | 2  | 0 | 0 |
| male   | 62 | 2015-2018 | Pancreatitis | 408170 | smoker     | 2 | 1 | 1 | 2 | 0  | 2  | 0 | 0 |
| female | 55 | 2015-2018 | Pancreatitis | 408170 | smoker     | 2 | 1 | 0 | 0 | 1  | 2  | 0 | 0 |
| female | 78 | 2015-2018 | PC           | 408170 | non-smoker | 8 | 0 | 0 | 0 | 0  | 0  | 0 | 0 |
| female | 67 | 2015-2018 | PC           | 408170 | smoker     | 8 | 0 | 0 | 0 | 0  | 0  | 1 | 1 |
| female | 74 | 2015-2018 | PC           | 408170 | non-smoker | 8 | 0 | 0 | 0 | 0  | 0  | 0 | 0 |
| male   | 85 | 2015-2018 | PC           | 408170 | ex-smoker  | 8 | 0 | 0 | 0 | 0  | 0  | 0 | 0 |
| female | 71 | 2015-2018 | PC           | 408170 | non-smoker | 8 | 0 | 1 | 1 | 1  | 0  | 0 | 1 |
| female | 68 | 2015-2018 | PC           | 408170 | non-smoker | 8 | 1 | 1 | 1 | 0  | 0  | 0 | 0 |
| female | 81 | 2015-2018 | PC           | 408170 | non-smoker | 8 | 1 | 1 | 1 | 1  | 0  | 0 | 0 |
| male   | 86 | 2015-2018 | PC           | 408170 | ex-smoker  | 8 | 1 | 0 | 0 | 0  | 0  | 0 | 0 |
| female | 71 | 2015-2018 | PC           | 408170 | non-smoker | 8 | 1 | 0 | 0 | 0  | 0  | 0 | 1 |
| male   | 85 | 2015-2018 | PC           | 408170 | ex-smoker  | 8 | 1 | 1 | 2 | 0  | 0  | 0 | 0 |
| male   | 85 | 2015-2018 | PC           | 408170 | ex-smoker  | 8 | 1 | 0 | 0 | 0  | 0  | 0 | 1 |
| female | 84 | 2015-2018 | PC           | 408170 | non-smoker | 8 | 1 | 1 | 1 | 1  | 0  | 0 | 1 |
| male   | 74 | 2015-2018 | PC           | 408170 | non-smoker | 8 | 1 | 0 | 0 | 1  | 0  | 0 | 1 |
| male   | 88 | 2015-2018 | PC           | 408170 | ex-smoker  | 8 | 1 | 0 | 0 | 0  | 0  | 0 | 1 |
| female | 79 | 2015-2018 | PC           | 408170 | non-smoker | 8 | 0 | 0 | 0 | 0  | 0  | 0 | 1 |
| male   | 80 | 2015-2018 | PC           | 408170 | non-smoker | 8 | 1 | 1 | 2 | 0  | 0  | 0 | 1 |
| male   | 49 | 2015-2018 | PC           | 408170 | non-smoker | 8 | 0 | 0 | 0 | 0  | 0  | 1 | 1 |
| male   | 79 | 2015-2018 | PC           | 408170 | smoker     | 8 | 1 | 0 | 0 | 0  | 0  | 0 | 0 |
| female | 80 | 2015-2018 | PC           | 408170 | non-smoker | 8 | 0 | 0 | 0 | 0  | 0  | 0 | 0 |
| male   | 81 | 2015-2018 | PC           | 408170 | non-smoker | 8 | 0 | 0 | 0 | 0  | 0  | 0 | 0 |
| male   | 81 | 2015-2018 | PC           | 408170 | non-smoker | 8 | 0 | 0 | 0 | 0  | 0  | 0 | 0 |
| male   | 86 | 2015-2018 | PC           | 408170 | NA         | 8 | 1 | 0 | 0 | 1  | 0  | 0 | 0 |
| male   | 70 | 2015-2018 | PC           | 408170 | ex-smoker  | 8 | 1 | 0 | 0 | 0  | 0  | 0 | 0 |
| female | 85 | 2015-2018 | PC           | 408170 | non-smoker | 8 | 1 | 0 | 0 | 1  | 0  | 0 | 0 |
| female | 71 | 2015-2018 | PC           | 408170 | non-smoker | 8 | 1 | 0 | 0 | 0  | 0  | 0 | 0 |
| female | 65 | 2015-2018 | PC           | 408170 | ex-smoker  | 8 | 1 | 0 | 0 | 0  | 0  | 0 | 0 |

|        |    |           |              |         |            |   |   |   |   |    |    |   |   |
|--------|----|-----------|--------------|---------|------------|---|---|---|---|----|----|---|---|
| male   | 56 | 2015-2018 | PC           | 408170  | ex-smoker  | 8 | 1 | 0 | 0 | 1  | 0  | 0 | 1 |
| male   | 78 | 2015-2018 | PC           | 408170  | ex-smoker  | 8 | 1 | 0 | 0 | 1  | 0  | 0 | 0 |
| male   | 45 | 2015-2018 | PC           | 408170  | smoker     | 8 | 1 | 0 | 0 | 1  | 0  | 0 | 1 |
| male   | 81 | 2015-2018 | PC           | 408170  | non-smoker | 8 | 1 | 1 | 2 | 1  | 0  | 0 | 0 |
| male   | 64 | 2015-2018 | PC           | 408170  | smoker     | 8 | 1 | 1 | 1 | 0  | 0  | 0 | 0 |
| female | 88 | 2015-2018 | CTR          | 408170  | non-smoker | 8 | 1 | 0 | 0 | NA | 0  | 0 | 0 |
| female | 80 | 2015-2018 | CTR          | 408170  | non-smoker | 8 | 0 | 1 | 2 | 1  | 0  | 1 | 1 |
| male   | 88 | 2015-2018 | CTR          | 408170  | ex-smoker  | 8 | 1 | 0 | 0 | 0  | 0  | 0 | 0 |
| female | 79 | 2015-2018 | CTR          | 408170  | non-smoker | 8 | 1 | 0 | 0 | 1  | 0  | 0 | 0 |
| female | 59 | 2015-2018 | CTR          | 408170  | non-smoker | 8 | 0 | 0 | 0 | 1  | 0  | 0 | 0 |
| male   | 91 | 2015-2018 | CTR          | 408170  | non-smoker | 8 | 1 | 0 | 0 | 0  | 0  | 0 | 1 |
| female | 62 | 2015-2018 | CTR          | 408170  | non-smoker | 8 | 1 | 0 | 0 | 0  | 0  | 0 | 0 |
| male   | 81 | 2015-2018 | CTR          | 408170  | ex-smoker  | 8 | 1 | 1 | 2 | 0  | 0  | 0 | 0 |
| male   | 81 | 2015-2018 | CTR          | 408170  | ex-smoker  | 8 | 1 | 0 | 0 | 0  | 0  | 0 | 1 |
| female | 76 | 2015-2018 | CTR          | 408170  | non-smoker | 8 | 0 | 0 | 0 | 0  | 0  | 0 | 0 |
| male   | 71 | 2015-2018 | CTR          | 408170  | non-smoker | 8 | 1 | 0 | 0 | 1  | 0  | 0 | 0 |
| male   | 93 | 2015-2018 | CTR          | 408170  | smoker     | 8 | 1 | 0 | 0 | 1  | 0  | 1 | 0 |
| female | 85 | 2015-2018 | CTR          | 408170  | smoker     | 8 | 0 | 0 | 0 | 0  | 0  | 0 | 0 |
| male   | 72 | 2015-2018 | CTR          | 408170  | smoker     | 8 | 1 | 0 | 0 | 1  | 0  | 0 | 0 |
| male   | 49 | 2015-2018 | CTR          | 408170  | non-smoker | 8 | 1 | 0 | 0 | 0  | 0  | 0 | 1 |
| female | 87 | 2015-2018 | CTR          | 408170  | non-smoker | 8 | 0 | 1 | 2 | 1  | 0  | 0 | 0 |
| male   | 87 | 2015-2018 | CTR          | 408170  | ex-smoker  | 8 | 1 | 0 | 0 | 0  | 0  | 0 | 0 |
| male   | 78 | 2015-2018 | CTR          | 408170  | smoker     | 8 | 1 | 0 | 0 | 1  | 0  | 0 | 0 |
| female | 69 | 2015-2018 | CTR          | 408170  | ex-smoker  | 8 | 1 | 0 | 0 | 0  | 0  | 0 | 0 |
| female | 85 | 2015-2018 | CTR          | 408170  | non-smoker | 8 | 0 | 0 | 0 | 0  | 0  | 0 | 0 |
| male   | 69 | 2015-2018 | CTR          | 408170  | ex-smoker  | 8 | 1 | 0 | 0 | 1  | 0  | 0 | 1 |
| female | 58 | 2015-2018 | CTR          | 408170  | ex-smoker  | 8 | 1 | 0 | 0 | 0  | 0  | 0 | 0 |
| male   | 59 | 2015-2018 | CTR          | 408170  | ex-smoker  | 8 | 0 | 0 | 0 | 0  | 0  | 0 | 0 |
| male   | 71 | 2015-2018 | CTR          | 408170  | smoker     | 8 | 1 | 0 | 0 | 1  | 0  | 1 | 0 |
| female | 77 | 2015-2018 | Pancreatitis | 408170  | non-smoker | 8 | 1 | 0 | 0 | 0  | 2  | 0 | 1 |
| male   | 74 | 2015-2018 | Pancreatitis | 408170  | ex-smoker  | 8 | 1 | 0 | 0 | 1  | 2  | 0 | 0 |
| male   | 54 | 2015-2018 | Pancreatitis | 408170  | non-smoker | 8 | 1 | 1 | 2 | 0  | 2  | 0 | 0 |
| male   | 79 | 2015-2018 | PC           | 1679718 | smoker     | 2 | 0 | 0 | 0 | 0  | 0  | 0 | 0 |
| male   | 62 | 2015-2018 | PC           | 1679718 | ex-smoker  | 2 | 1 | 0 | 0 | 0  | 0  | 0 | 0 |
| female | 69 | 2015-2018 | PC           | 1679718 | smoker     | 2 | 0 | 0 | 0 | 0  | 0  | 0 | 1 |
| male   | 54 | 2015-2018 | PC           | 1679718 | non-smoker | 2 | 1 | 0 | 0 | 0  | 0  | 0 | 0 |
| female | 68 | 2015-2018 | PC           | 1679718 | non-smoker | 2 | 1 | 0 | 0 | NA | 0  | 0 | 0 |
| male   | 68 | 2015-2018 | PC           | 1679718 | ex-smoker  | 2 | 1 | 1 | 1 | 0  | 0  | 0 | 0 |
| male   | 71 | 2015-2018 | PC           | 1679718 | non-smoker | 2 | 0 | 0 | 0 | 0  | 0  | 0 | 0 |
| male   | 84 | 2015-2018 | PC           | 1679718 | non-smoker | 2 | 1 | 1 | 1 | 0  | 0  | 0 | 0 |
| female | 69 | 2015-2018 | PC           | 1679718 | non-smoker | 2 | 0 | 0 | 0 | 0  | 0  | 1 | 1 |
| male   | 66 | 2015-2018 | PC           | 1679718 | smoker     | 2 | 1 | 0 | 0 | 0  | 0  | 0 | 1 |
| male   | 82 | 2015-2018 | PC           | 1679718 | ex-smoker  | 2 | 1 | 1 | 2 | 0  | 0  | 0 | 0 |
| male   | 70 | 2015-2018 | PC           | 1679718 | non-smoker | 2 | 1 | 1 | 2 | 1  | 0  | 0 | 0 |
| male   | 60 | 2015-2018 | PC           | 1679718 | smoker     | 2 | 1 | 0 | 0 | 0  | 2  | 0 | 0 |
| male   | 63 | 2015-2018 | PC           | 1679718 | ex-smoker  | 2 | 1 | 0 | 0 | 1  | 0  | 0 | 0 |
| male   | 45 | 2015-2018 | PC           | 1679718 | ex-smoker  | 2 | 1 | 0 | 0 | 0  | NA | 1 | 0 |
| female | 73 | 2015-2018 | PC           | 1679718 | non-smoker | 2 | 1 | 0 | 0 | 1  | 0  | 0 | 0 |
| female | 67 | 2015-2018 | PC           | 1679718 | non-smoker | 2 | 0 | 0 | 0 | 0  | 0  | 0 | 0 |
| male   | 66 | 2015-2018 | PC           | 1679718 | non-smoker | 2 | 0 | 1 | 2 | 0  | 0  | 0 | 0 |
| male   | 68 | 2015-2018 | PC           | 1679718 | smoker     | 2 | 1 | 1 | 1 | 0  | 0  | 0 | 0 |
| male   | 52 | 2015-2018 | PC           | 1679718 | smoker     | 2 | 1 | 0 | 0 | 1  | 0  | 0 | 1 |
| male   | 68 | 2015-2018 | PC           | 1679718 | non-smoker | 2 | 1 | 0 | 0 | 0  | 0  | 0 | 0 |
| male   | 83 | 2015-2018 | CTR          | 1679718 | ex-smoker  | 2 | 1 | 0 | 0 | NA | 0  | 0 | 0 |
| male   | 57 | 2015-2018 | CTR          | 1679718 | non-smoker | 2 | 1 | 0 | 0 | 0  | 0  | 0 | 0 |
| female | 70 | 2015-2018 | CTR          | 1679718 | non-smoker | 2 | 0 | 0 | 0 | 0  | 1  | 0 | 1 |
| male   | 54 | 2015-2018 | CTR          | 1679718 | non-smoker | 2 | 1 | 0 | 0 | 0  | 0  | 0 | 0 |
| female | 72 | 2015-2018 | CTR          | 1679718 | smoker     | 2 | 1 | 0 | 0 | 0  | 0  | 0 | 0 |
| male   | 76 | 2015-2018 | Pancreatitis | 1679718 | ex-smoker  | 2 | 1 | 1 | 2 | 1  | 2  | 0 | 0 |
| male   | 67 | 2015-2018 | CTR          | 1679718 | non-smoker | 2 | 1 | 1 | 2 | 0  | 0  | 0 | 0 |
| male   | 82 | 2015-2018 | CTR          | 1679718 | non-smoker | 2 | 0 | 0 | 0 | 0  | 0  | 0 | 0 |
| female | 64 | 2015-2018 | CTR          | 1679718 | non-smoker | 2 | 1 | 0 | 0 | 0  | 0  | 0 | 0 |
| male   | 63 | 2015-2018 | CTR          | 1679718 | ex-smoker  | 2 | 1 | 0 | 0 | 0  | 0  | 0 | 1 |
| male   | 84 | 2015-2018 | CTR          | 1679718 | ex-smoker  | 2 | 1 | 1 | 2 | 1  | 0  | 0 | 0 |
| male   | 61 | 2015-2018 | CTR          | 1679718 | smoker     | 2 | 1 | 0 | 0 | 0  | 0  | 0 | 0 |
| male   | 53 | 2015-2018 | CTR          | 1679718 | ex-smoker  | 2 | 1 | 0 | 0 | 0  | 0  | 0 | 0 |
| male   | 57 | 2015-2018 | CTR          | 1679718 | non-smoker | 2 | 1 | 0 | 0 | 1  | 0  | 0 | 1 |
| male   | 38 | 2015-2018 | CTR          | 1679718 | ex-smoker  | 2 | 1 | 0 | 0 | 0  | 0  | 0 | 0 |
| female | 68 | 2015-2018 | CTR          | 1679718 | ex-smoker  | 2 | 1 | 0 | 0 | 0  | 0  | 0 | 0 |
| female | 81 | 2015-2018 | CTR          | 1679718 | non-smoker | 2 | 1 | 0 | 0 | 0  | 0  | 0 | 1 |
| female | 65 | 2015-2018 | CTR          | 1679718 | non-smoker | 2 | 1 | 0 | 0 | 0  | 0  | 0 | 0 |
| male   | 61 | 2015-2018 | CTR          | 1679718 | non-smoker | 2 | 0 | 0 | 0 | 0  | 0  | 0 | 0 |
| male   | 59 | 2015-2018 | CTR          | 1679718 | ex-smoker  | 2 | 1 | 0 | 0 | 1  | 0  | 0 | 0 |
| male   | 56 | 2015-2018 | CTR          | 1679718 | smoker     | 2 | 1 | 0 | 0 | 0  | 0  | 0 | 0 |
| male   | 63 | 2015-2018 | CTR          | 1679718 | smoker     | 2 | 1 | 0 | 0 | 0  | 0  | 0 | 1 |
| male   | 63 | 2015-2018 | CTR          | 1679718 | smoker     | 2 | 1 | 0 | 0 | 0  | 0  | 0 | 0 |
| male   | 79 | 2015-2018 | Pancreatitis | 1679718 | ex-smoker  | 2 | 1 | 1 | 2 | 0  | 2  | 0 | 0 |
| male   | 64 | 2015-2018 | Pancreatitis | 1679718 | smoker     | 2 | 1 | 1 | 2 | 0  | 2  | 0 | 0 |
| female | 62 | 2015-2018 | Pancreatitis | 1679718 | ex-smoker  | 2 | 1 | 1 | 2 | 1  | 2  | 1 | 0 |
| male   | 54 | 2015-2018 | Pancreatitis | 1679718 | smoker     | 2 | 1 | 0 | 0 | 0  | 2  | 0 | 0 |
| female | 58 | 2015-2018 | Pancreatitis | 1679718 | smoker     | 2 | 1 | 1 | 2 | 0  | 2  | 0 | 1 |
| male   | 58 | 2015-2018 | Pancreatitis | 1679718 | smoker     | 2 | 1 | 0 | 0 | 0  | 2  | 0 | 0 |
| male   | 67 | 2015-2018 | Pancreatitis | 1679718 | smoker     | 2 | 1 | 0 | 0 | 0  | 2  | 0 | 0 |
| male   | 76 | 2015-2018 | Pancreatitis | 1679718 | ex-smoker  | 2 | 1 | 1 | 2 | 0  | 2  | 0 | 0 |
| female | 72 | 2015-2018 | Pancreatitis | 1679718 | ex-smoker  | 2 | 1 | 1 | 2 | 0  | 2  | 0 | 0 |
| male   | 58 | 2015-2018 | Pancreatitis | 1679718 | smoker     | 2 | 1 | 1 | 2 | 1  | 2  | 0 | 0 |
| male   | 78 | 2015-2018 | Pancreatitis | 1679718 | ex-smoker  | 2 | 1 | 1 | 2 | 0  | 2  | 0 | 0 |
| male   | 60 | 2015-2018 | Pancreatitis | 1679718 | ex-smoker  | 2 | 1 | 1 | 2 | 0  | 1  | 0 | 1 |
| male   | 58 | 2015-2018 | Pancreatitis | 1679718 | smoker     | 2 | 1 | 1 | 2 | 0  | 2  | 0 | 0 |
| male   | 64 | 2015-2018 | Pancreatitis | 1679718 | ex-smoker  | 2 | 1 | 1 | 1 | 1  | 2  | 0 | 1 |

|        |    |           |              |         |            |   |   |    |   |    |   |   |   |
|--------|----|-----------|--------------|---------|------------|---|---|----|---|----|---|---|---|
| male   | 45 | 2015-2018 | Pancreatitis | 1679718 | ex-smoker  | 2 | 1 | 0  | 0 | 0  | 2 | 0 | 1 |
| female | 83 | 2015-2018 | Pancreatitis | 1679718 | smoker     | 2 | 0 | 1  | 2 | 0  | 2 | 0 | 0 |
| female | 71 | 2015-2018 | Pancreatitis | 1679718 | non-smoker | 2 | 0 | 0  | 0 | 0  | 2 | 1 | 0 |
| male   | 64 | 2015-2018 | Pancreatitis | 1679718 | smoker     | 2 | 1 | 1  | 2 | 0  | 2 | 0 | 0 |
| male   | 61 | 2015-2018 | Pancreatitis | 1679718 | smoker     | 2 | 1 | 1  | 2 | 0  | 2 | 0 | 0 |
| male   | 55 | 2015-2018 | Pancreatitis | 1679718 | smoker     | 2 | 1 | 1  | 2 | 0  | 2 | 0 | 0 |
| male   | 62 | 2015-2018 | Pancreatitis | 1679718 | smoker     | 2 | 1 | 1  | 2 | 0  | 2 | 0 | 0 |
| female | 55 | 2015-2018 | Pancreatitis | 1679718 | smoker     | 2 | 1 | 0  | 0 | 1  | 2 | 0 | 0 |
| female | 78 | 2015-2018 | PC           | 1679718 | non-smoker | 8 | 0 | 0  | 0 | 0  | 0 | 0 | 0 |
| female | 67 | 2015-2018 | PC           | 1679718 | smoker     | 8 | 0 | 0  | 0 | 0  | 0 | 1 | 1 |
| female | 74 | 2015-2018 | PC           | 1679718 | non-smoker | 8 | 0 | 0  | 0 | 0  | 0 | 0 | 0 |
| male   | 85 | 2015-2018 | PC           | 1679718 | ex-smoker  | 8 | 0 | 0  | 0 | 0  | 0 | 0 | 0 |
| female | 71 | 2015-2018 | PC           | 1679718 | non-smoker | 8 | 0 | 1  | 1 | 1  | 0 | 0 | 1 |
| female | 68 | 2015-2018 | PC           | 1679718 | non-smoker | 8 | 1 | 1  | 1 | 0  | 0 | 0 | 0 |
| female | 81 | 2015-2018 | PC           | 1679718 | ex-smoker  | 8 | 0 | 1  | 2 | 1  | 0 | 0 | 0 |
| female | 81 | 2015-2018 | PC           | 1679718 | non-smoker | 8 | 1 | 1  | 1 | 1  | 0 | 0 | 0 |
| male   | 86 | 2015-2018 | PC           | 1679718 | ex-smoker  | 8 | 1 | 0  | 0 | 0  | 0 | 0 | 0 |
| female | 71 | 2015-2018 | PC           | 1679718 | non-smoker | 8 | 1 | 0  | 0 | 0  | 0 | 0 | 1 |
| male   | 85 | 2015-2018 | PC           | 1679718 | ex-smoker  | 8 | 1 | 1  | 2 | 0  | 0 | 0 | 0 |
| male   | 85 | 2015-2018 | PC           | 1679718 | ex-smoker  | 8 | 1 | 0  | 0 | 0  | 0 | 0 | 1 |
| female | 78 | 2015-2018 | PC           | 1679718 | non-smoker | 8 | 0 | 0  | 0 | 1  | 0 | 0 | 0 |
| female | 84 | 2015-2018 | PC           | 1679718 | non-smoker | 8 | 1 | 1  | 1 | 1  | 0 | 0 | 1 |
| male   | 74 | 2015-2018 | PC           | 1679718 | non-smoker | 8 | 1 | 0  | 0 | 1  | 0 | 0 | 1 |
| male   | 88 | 2015-2018 | PC           | 1679718 | ex-smoker  | 8 | 1 | 0  | 0 | 0  | 0 | 0 | 1 |
| female | 79 | 2015-2018 | PC           | 1679718 | non-smoker | 8 | 0 | 0  | 0 | 0  | 0 | 0 | 1 |
| male   | 80 | 2015-2018 | PC           | 1679718 | non-smoker | 8 | 1 | 1  | 2 | 0  | 0 | 0 | 1 |
| male   | 49 | 2015-2018 | PC           | 1679718 | non-smoker | 8 | 0 | 0  | 0 | 0  | 0 | 1 | 1 |
| male   | 79 | 2015-2018 | PC           | 1679718 | smoker     | 8 | 1 | 0  | 0 | 0  | 0 | 0 | 0 |
| female | 80 | 2015-2018 | PC           | 1679718 | non-smoker | 8 | 0 | 0  | 0 | 0  | 0 | 0 | 0 |
| male   | 81 | 2015-2018 | PC           | 1679718 | non-smoker | 8 | 0 | 0  | 0 | 0  | 0 | 0 | 0 |
| male   | 86 | 2015-2018 | PC           | 1679718 | NA         | 8 | 1 | 0  | 0 | 1  | 0 | 0 | 0 |
| male   | 70 | 2015-2018 | PC           | 1679718 | ex-smoker  | 8 | 1 | 0  | 0 | 0  | 0 | 0 | 0 |
| female | 85 | 2015-2018 | PC           | 1679718 | non-smoker | 8 | 1 | 0  | 0 | 1  | 0 | 0 | 0 |
| female | 71 | 2015-2018 | PC           | 1679718 | non-smoker | 8 | 1 | 0  | 0 | 0  | 0 | 0 | 0 |
| male   | 67 | 2015-2018 | PC           | 1679718 | ex-smoker  | 8 | 1 | 0  | 0 | 0  | 0 | 0 | 0 |
| male   | 69 | 2015-2018 | PC           | 1679718 | ex-smoker  | 8 | 1 | 1  | 2 | 1  | 0 | 0 | 0 |
| female | 75 | 2015-2018 | PC           | 1679718 | non-smoker | 8 | 0 | 0  | 0 | 0  | 0 | 0 | 0 |
| female | 79 | 2015-2018 | PC           | 1679718 | non-smoker | 8 | 0 | 0  | 0 | 1  | 0 | 0 | 0 |
| female | 74 | 2015-2018 | PC           | 1679718 | non-smoker | 8 | 0 | 0  | 0 | 0  | 0 | 0 | 0 |
| male   | 62 | 2015-2018 | PC           | 1679718 | ex-smoker  | 8 | 1 | 1  | 2 | 0  | 1 | 0 | 1 |
| male   | 83 | 2015-2018 | PC           | 1679718 | ex-smoker  | 8 | 1 | 1  | 2 | 0  | 0 | 0 | 0 |
| female | 65 | 2015-2018 | PC           | 1679718 | ex-smoker  | 8 | 1 | 0  | 0 | 0  | 0 | 0 | 0 |
| male   | 56 | 2015-2018 | PC           | 1679718 | ex-smoker  | 8 | 1 | 0  | 0 | 1  | 0 | 0 | 1 |
| male   | 78 | 2015-2018 | PC           | 1679718 | ex-smoker  | 8 | 1 | 0  | 0 | 1  | 0 | 0 | 0 |
| male   | 45 | 2015-2018 | PC           | 1679718 | smoker     | 8 | 1 | 0  | 0 | 1  | 0 | 0 | 1 |
| male   | 81 | 2015-2018 | PC           | 1679718 | non-smoker | 8 | 1 | 1  | 2 | 1  | 0 | 0 | 0 |
| male   | 64 | 2015-2018 | PC           | 1679718 | smoker     | 8 | 1 | 1  | 1 | 0  | 0 | 0 | 0 |
| female | 88 | 2015-2018 | CTR          | 1679718 | non-smoker | 8 | 1 | 0  | 0 | NA | 0 | 0 | 0 |
| female | 68 | 2015-2018 | CTR          | 1679718 | ex-smoker  | 8 | 1 | 0  | 0 | 0  | 0 | 0 | 0 |
| female | 80 | 2015-2018 | CTR          | 1679718 | non-smoker | 8 | 0 | 1  | 2 | 1  | 0 | 1 | 1 |
| male   | 88 | 2015-2018 | CTR          | 1679718 | ex-smoker  | 8 | 1 | 0  | 0 | 0  | 0 | 0 | 0 |
| female | 79 | 2015-2018 | CTR          | 1679718 | non-smoker | 8 | 1 | 0  | 0 | 1  | 0 | 0 | 0 |
| female | 59 | 2015-2018 | CTR          | 1679718 | non-smoker | 8 | 0 | 0  | 0 | 1  | 0 | 0 | 0 |
| female | 77 | 2015-2018 | CTR          | 1679718 | non-smoker | 8 | 1 | 0  | 0 | 1  | 0 | 0 | 0 |
| female | 84 | 2015-2018 | CTR          | 1679718 | non-smoker | 8 | 0 | 0  | 0 | 0  | 0 | 0 | 0 |
| female | 84 | 2015-2018 | CTR          | 1679718 | non-smoker | 8 | 0 | 0  | 0 | 0  | 0 | 0 | 0 |
| male   | 91 | 2015-2018 | CTR          | 1679718 | non-smoker | 8 | 1 | 0  | 0 | 0  | 0 | 0 | 1 |
| female | 62 | 2015-2018 | CTR          | 1679718 | non-smoker | 8 | 1 | 0  | 0 | 0  | 0 | 0 | 0 |
| female | 62 | 2015-2018 | CTR          | 1679718 | non-smoker | 8 | 1 | 0  | 0 | 0  | 0 | 0 | 0 |
| male   | 81 | 2015-2018 | CTR          | 1679718 | ex-smoker  | 8 | 1 | 1  | 2 | 0  | 0 | 0 | 0 |
| male   | 81 | 2015-2018 | CTR          | 1679718 | ex-smoker  | 8 | 1 | 0  | 0 | 0  | 0 | 0 | 1 |
| female | 76 | 2015-2018 | CTR          | 1679718 | non-smoker | 8 | 0 | 0  | 0 | 0  | 0 | 0 | 0 |
| female | 78 | 2015-2018 | CTR          | 1679718 | non-smoker | 8 | 0 | 1  | 2 | 0  | 0 | 0 | 1 |
| male   | 71 | 2015-2018 | CTR          | 1679718 | non-smoker | 8 | 1 | 0  | 0 | 1  | 0 | 0 | 0 |
| male   | 93 | 2015-2018 | CTR          | 1679718 | smoker     | 8 | 1 | 0  | 0 | 1  | 0 | 1 | 0 |
| female | 85 | 2015-2018 | CTR          | 1679718 | smoker     | 8 | 0 | 0  | 0 | 0  | 0 | 0 | 0 |
| male   | 72 | 2015-2018 | CTR          | 1679718 | smoker     | 8 | 1 | 0  | 0 | 1  | 0 | 0 | 0 |
| male   | 49 | 2015-2018 | CTR          | 1679718 | non-smoker | 8 | 1 | 0  | 0 | 0  | 0 | 0 | 1 |
| female | 78 | 2015-2018 | CTR          | 1679718 | smoker     | 8 | 1 | NA | 0 | 0  | 0 | 0 | 0 |
| female | 87 | 2015-2018 | CTR          | 1679718 | non-smoker | 8 | 0 | 1  | 2 | 1  | 0 | 0 | 0 |
| male   | 87 | 2015-2018 | CTR          | 1679718 | ex-smoker  | 8 | 1 | 0  | 0 | 0  | 0 | 0 | 0 |
| male   | 87 | 2015-2018 | CTR          | 1679718 | ex-smoker  | 8 | 1 | 0  | 0 | 0  | 0 | 0 | 0 |
| male   | 78 | 2015-2018 | CTR          | 1679718 | smoker     | 8 | 1 | 0  | 0 | 1  | 0 | 0 | 0 |
| female | 88 | 2015-2018 | CTR          | 1679718 | non-smoker | 8 | 0 | 0  | 0 | 0  | 0 | 0 | 0 |
| female | 69 | 2015-2018 | CTR          | 1679718 | ex-smoker  | 8 | 1 | 0  | 0 | 0  | 0 | 0 | 0 |
| male   | 73 | 2015-2018 | CTR          | 1679718 | ex-smoker  | 8 | 1 | 0  | 0 | 0  | 0 | 0 | 0 |
| male   | 77 | 2015-2018 | CTR          | 1679718 | non-smoker | 8 | 1 | 0  | 0 | 0  | 0 | 0 | 0 |
| female | 85 | 2015-2018 | CTR          | 1679718 | non-smoker | 8 | 0 | 0  | 0 | 0  | 0 | 0 | 0 |
| female | 89 | 2015-2018 | CTR          | 1679718 | non-smoker | 8 | 1 | 0  | 0 | 0  | 0 | 1 | 0 |
| male   | 69 | 2015-2018 | CTR          | 1679718 | ex-smoker  | 8 | 1 | 0  | 0 | 1  | 0 | 0 | 1 |
| female | 58 | 2015-2018 | CTR          | 1679718 | ex-smoker  | 8 | 1 | 0  | 0 | 0  | 0 | 0 | 1 |
| male   | 59 | 2015-2018 | CTR          | 1679718 | ex-smoker  | 8 | 0 | 0  | 0 | 0  | 0 | 0 | 0 |
| male   | 71 | 2015-2018 | CTR          | 1679718 | smoker     | 8 | 1 | 0  | 0 | 1  | 0 | 1 | 0 |
| female | 77 | 2015-2018 | Pancreatitis | 1679718 | non-smoker | 8 | 1 | 0  | 0 | 0  | 2 | 0 | 1 |
| female | 51 | 2015-2018 | Pancreatitis | 1679718 | ex-smoker  | 8 | 1 | 0  | 0 | 0  | 2 | 0 | 1 |
| female | 51 | 2015-2018 | Pancreatitis | 1679718 | ex-smoker  | 8 | 1 | 0  | 0 | 0  | 2 | 0 | 1 |
| female | 56 | 2015-2018 | Pancreatitis | 1679718 | non-smoker | 8 | 1 | 0  | 0 | 0  | 2 | 0 | 1 |
| male   | 74 | 2015-2018 | Pancreatitis | 1679718 | ex-smoker  | 8 | 1 | 0  | 0 | 1  | 2 | 0 | 0 |
| male   | 54 | 2015-2018 | Pancreatitis | 1679718 | non-smoker | 8 | 1 | 1  | 2 | 0  | 2 | 0 | 0 |
| male   | 68 | 2015-2018 | Pancreatitis | 1679718 | smoker     | 8 | 0 | 1  | 2 | 1  | 2 | 0 | 0 |

|        |    |           |              |        |            |   |   |   |   |   |   |   |   |
|--------|----|-----------|--------------|--------|------------|---|---|---|---|---|---|---|---|
| male   | 79 | 2015-2017 | PC           | 646099 | smoker     | 2 | 0 | 0 | 0 | 0 | 0 | 0 | 0 |
| male   | 79 | 2015-2017 | PC           | 646099 | smoker     | 2 | 0 | 0 | 0 | 0 | 0 | 0 | 0 |
| female | 68 | 2015-2017 | PC           | 646099 | smoker     | 2 | 0 | 0 | 0 | 0 | 0 | 0 | 1 |
| male   | 54 | 2015-2017 | PC           | 646099 | non-smoker | 2 | 1 | 0 | 0 | 0 | 0 | 0 | 0 |
| female | 68 | 2015-2017 | PC           | 646099 | non-smoker | 2 | 1 | 0 | 0 | 1 | 0 | 0 | 0 |
| female | 68 | 2015-2017 | PC           | 646099 | non-smoker | 2 | 1 | 0 | 0 | 1 | 0 | 0 | 0 |
| male   | 71 | 2015-2017 | PC           | 646099 | non-smoker | 2 | 0 | 0 | 0 | 0 | 0 | 0 | 0 |
| male   | 84 | 2015-2017 | PC           | 646099 | non-smoker | 2 | 1 | 1 | 1 | 0 | 0 | 0 | 0 |
| male   | 84 | 2015-2017 | PC           | 646099 | non-smoker | 2 | 1 | 1 | 1 | 0 | 0 | 0 | 0 |
| female | 69 | 2015-2017 | PC           | 646099 | non-smoker | 2 | 0 | 0 | 0 | 0 | 0 | 1 | 1 |
| female | 69 | 2015-2017 | PC           | 646099 | non-smoker | 2 | 0 | 0 | 0 | 0 | 0 | 1 | 1 |
| male   | 82 | 2015-2017 | PC           | 646099 | ex-smoker  | 2 | 1 | 1 | 2 | 0 | 0 | 0 | 0 |
| male   | 82 | 2015-2017 | PC           | 646099 | ex-smoker  | 2 | 1 | 1 | 2 | 0 | 0 | 0 | 0 |
| male   | 82 | 2015-2017 | PC           | 646099 | ex-smoker  | 2 | 1 | 1 | 2 | 0 | 0 | 0 | 0 |
| male   | 60 | 2015-2017 | PC           | 646099 | smoker     | 2 | 1 | 0 | 0 | 0 | 2 | 0 | 0 |
| male   | 63 | 2015-2017 | PC           | 646099 | ex-smoker  | 2 | 1 | 0 | 0 | 1 | 0 | 0 | 0 |
| male   | 63 | 2015-2017 | PC           | 646099 | ex-smoker  | 2 | 1 | 0 | 0 | 1 | 0 | 0 | 0 |
| male   | 63 | 2015-2017 | PC           | 646099 | ex-smoker  | 2 | 1 | 0 | 0 | 1 | 0 | 0 | 0 |
| male   | 63 | 2015-2017 | PC           | 646099 | ex-smoker  | 2 | 1 | 0 | 0 | 1 | 0 | 0 | 0 |
| male   | 45 | 2015-2017 | PC           | 646099 | ex-smoker  | 2 | 1 | 0 | 0 | 0 | 0 | 1 | 0 |
| female | 73 | 2015-2017 | PC           | 646099 | non-smoker | 2 | 1 | 0 | 0 | 1 | 0 | 0 | 0 |
| female | 73 | 2015-2017 | PC           | 646099 | non-smoker | 2 | 1 | 0 | 0 | 1 | 0 | 0 | 0 |
| male   | 66 | 2015-2017 | PC           | 646099 | non-smoker | 2 | 0 | 1 | 2 | 0 | 0 | 0 | 0 |
| male   | 66 | 2015-2017 | PC           | 646099 | non-smoker | 2 | 0 | 1 | 2 | 0 | 0 | 0 | 0 |
| male   | 68 | 2015-2017 | PC           | 646099 | non-smoker | 2 | 1 | 0 | 0 | 0 | 0 | 0 | 0 |
| male   | 68 | 2015-2017 | PC           | 646099 | non-smoker | 2 | 1 | 0 | 0 | 0 | 0 | 0 | 0 |
| male   | 79 | 2015-2017 | Pancreatitis | 646099 | ex-smoker  | 2 | 1 | 1 | 2 | 0 | 2 | 0 | 0 |
| male   | 79 | 2015-2017 | Pancreatitis | 646099 | ex-smoker  | 2 | 1 | 1 | 2 | 0 | 2 | 0 | 0 |
| male   | 54 | 2015-2017 | Pancreatitis | 646099 | smoker     | 2 | 1 | 0 | 0 | 0 | 1 | 0 | 0 |
| male   | 54 | 2015-2017 | Pancreatitis | 646099 | smoker     | 2 | 1 | 0 | 0 | 0 | 1 | 0 | 0 |
| male   | 54 | 2015-2017 | Pancreatitis | 646099 | smoker     | 2 | 1 | 0 | 0 | 0 | 1 | 0 | 0 |
| male   | 58 | 2015-2017 | Pancreatitis | 646099 | smoker     | 2 | 1 | 0 | 0 | 0 | 0 | 0 | 0 |
| male   | 58 | 2015-2017 | Pancreatitis | 646099 | smoker     | 2 | 1 | 0 | 0 | 0 | 0 | 0 | 0 |
| female | 55 | 2015-2017 | Pancreatitis | 646099 | smoker     | 2 | 1 | 0 | 0 | 1 | 0 | 0 | 0 |
| female | 78 | 2015-2017 | PC           | 646099 | non-smoker | 8 | 0 | 0 | 0 | 0 | 0 | 0 | 0 |
| female | 67 | 2015-2017 | PC           | 646099 | smoker     | 8 | 0 | 0 | 0 | 0 | 0 | 1 | 1 |
| female | 67 | 2015-2017 | PC           | 646099 | smoker     | 8 | 0 | 0 | 0 | 0 | 0 | 1 | 1 |
| female | 74 | 2015-2017 | PC           | 646099 | non-smoker | 8 | 0 | 0 | 0 | 0 | 0 | 0 | 0 |
| female | 71 | 2015-2017 | PC           | 646099 | non-smoker | 8 | 0 | 1 | 1 | 1 | 0 | 0 | 1 |
| female | 71 | 2015-2017 | PC           | 646099 | non-smoker | 8 | 0 | 1 | 1 | 1 | 0 | 0 | 1 |
| female | 81 | 2015-2017 | PC           | 646099 | ex-smoker  | 8 | 0 | 1 | 2 | 1 | 0 | 0 | 0 |
| female | 81 | 2015-2017 | PC           | 646099 | ex-smoker  | 8 | 0 | 1 | 2 | 1 | 0 | 0 | 0 |
| male   | 85 | 2015-2017 | PC           | 646099 | ex-smoker  | 8 | 1 | 1 | 2 | 0 | 0 | 0 | 0 |
| male   | 85 | 2015-2017 | PC           | 646099 | ex-smoker  | 8 | 1 | 1 | 2 | 0 | 0 | 0 | 0 |
| male   | 85 | 2015-2017 | PC           | 646099 | ex-smoker  | 8 | 1 | 1 | 2 | 0 | 0 | 0 | 0 |
| female | 78 | 2015-2017 | PC           | 646099 | non-smoker | 8 | 0 | 0 | 0 | 1 | 0 | 0 | 0 |
| female | 78 | 2015-2017 | PC           | 646099 | non-smoker | 8 | 0 | 0 | 0 | 1 | 0 | 0 | 0 |
| female | 79 | 2015-2017 | PC           | 646099 | non-smoker | 8 | 0 | 0 | 0 | 0 | 0 | 0 | 1 |
| female | 79 | 2015-2017 | PC           | 646099 | non-smoker | 8 | 0 | 0 | 0 | 0 | 0 | 0 | 1 |
| female | 79 | 2015-2017 | PC           | 646099 | non-smoker | 8 | 0 | 0 | 0 | 0 | 0 | 0 | 1 |
| male   | 81 | 2015-2017 | PC           | 646099 | non-smoker | 8 | 1 | 1 | 2 | 1 | 0 | 0 | 0 |



|    |   |   |    |    |    |   |    |    |    |    |    |    |    |
|----|---|---|----|----|----|---|----|----|----|----|----|----|----|
| 1  | 0 | 1 | 0  | 1  | 1  | 1 | 0  | 1  | 0  | 1  | 2  | 1  | 2  |
| 1  | 0 | 1 | NA | 1  | 1  | 1 | 0  | 0  | 1  | 0  | 0  | 0  | 0  |
| 0  | 0 | 1 | 1  | 0  | 0  | 1 | 1  | 1  | 1  | 1  | 0  | 0  | 0  |
| 1  | 0 | 0 | 0  | 1  | 0  | 0 | 0  | 0  | 0  | 0  | 0  | 0  | 0  |
| 1  | 0 | 0 | 0  | 1  | 0  | 0 | 0  | 0  | 0  | 0  | 0  | 0  | 0  |
| 0  | 1 | 1 | 0  | 0  | 1  | 1 | 0  | 1  | 0  | 0  | 1  | 1  | 1  |
| 0  | 1 | 0 | 1  | 1  | 0  | 1 | 0  | 1  | 0  | 1  | 0  | 0  | 0  |
| 0  | 0 | 0 | 0  | 0  | 0  | 0 | 0  | 0  | 0  | 0  | 0  | 0  | 0  |
| 0  | 0 | 1 | 0  | 1  | 1  | 1 | 0  | 1  | 0  | 0  | 0  | 0  | 0  |
| NA | 0 | 0 | 0  | 0  | 0  | 1 | 1  | 1  | 0  | 0  | 0  | 0  | 0  |
| NA | 0 | 0 | 0  | 0  | 0  | 1 | 1  | 1  | 0  | 0  | 0  | 0  | 0  |
| 0  | 0 | 1 | 1  | 0  | 1  | 0 | 0  | 0  | 1  | 0  | 0  | 0  | 0  |
| 0  | 0 | 0 | NA | 0  | 0  | 1 | 0  | 1  | 1  | 0  | 0  | 0  | 0  |
| 0  | 0 | 1 | 1  | 1  | 1  | 1 | 0  | 0  | 1  | 0  | 0  | 0  | 0  |
| 0  | 0 | 0 | NA | 1  | 1  | 1 | 1  | 0  | 0  | 0  | 0  | 0  | 0  |
| 0  | 0 | 1 | 0  | 1  | 0  | 0 | 0  | 0  | 1  | 0  | 1  | 2  | 1  |
| 0  | 0 | 1 | 1  | 0  | 1  | 0 | 0  | 0  | 1  | 0  | 0  | 0  | 0  |
| 0  | 0 | 0 | 0  | 1  | 0  | 0 | 0  | 0  | 0  | 1  | 0  | 0  | 0  |
| 1  | 0 | 0 | 1  | 0  | 1  | 0 | 0  | 0  | 0  | 1  | 0  | 0  | 0  |
| 0  | 0 | 0 | 0  | 1  | 0  | 0 | 0  | 0  | 0  | 0  | 0  | 0  | 0  |
| 0  | 0 | 0 | 1  | 1  | 0  | 1 | 1  | 1  | 0  | 1  | 0  | 1  | 1  |
| 0  | 0 | 0 | NA | NA | 1  | 1 | 0  | 1  | NA | 0  | 1  | 1  | 1  |
| 1  | 0 | 1 | 0  | 1  | 0  | 1 | 0  | 0  | 0  | 1  | 0  | 0  | 0  |
| 0  | 0 | 1 | 1  | 0  | 0  | 0 | 0  | 0  | 1  | 0  | 0  | 0  | 0  |
| 0  | 0 | 0 | 1  | 1  | 1  | 1 | 1  | 1  | 0  | 0  | 0  | 0  | 0  |
| 1  | 0 | 1 | 1  | 0  | 0  | 0 | 0  | 0  | 1  | 0  | 2  | 2  | 1  |
| 0  | 0 | 0 | 0  | 0  | 1  | 0 | 0  | 0  | 0  | 0  | 1  | 1  | 2  |
| 0  | 1 | 0 | 0  | NA | 0  | 1 | 0  | 0  | NA | NA | 0  | 0  | 0  |
| 1  | 0 | 1 | 1  | 0  | 1  | 1 | 1  | 0  | 1  | 1  | 1  | 1  | 2  |
| 0  | 0 | 1 | 0  | 1  | 1  | 1 | 1  | 1  | 0  | 0  | 0  | 0  | 0  |
| 0  | 0 | 1 | 0  | 0  | 0  | 0 | 0  | 0  | 0  | 0  | 0  | 0  | 0  |
| 0  | 1 | 1 | 0  | 0  | 1  | 1 | 1  | 0  | 1  | 0  | 0  | 0  | 0  |
| 0  | 0 | 1 | 0  | 1  | 0  | 1 | 0  | 1  | 0  | 0  | 0  | 0  | 0  |
| 0  | 0 | 1 | 0  | 0  | 0  | 0 | 0  | 0  | 0  | 0  | 1  | 2  | 2  |
| 0  | 0 | 1 | 0  | 0  | 0  | 0 | 0  | 0  | 0  | 0  | 0  | 0  | 0  |
| 0  | 1 | 1 | 1  | 1  | 0  | 1 | 1  | 1  | 0  | 1  | 0  | 0  | 0  |
| 0  | 0 | 1 | 0  | NA | NA | 1 | 0  | 0  | NA | 0  | 0  | 0  | 0  |
| 1  | 0 | 0 | 1  | 0  | 1  | 0 | 0  | 0  | 1  | 0  | 0  | 0  | 0  |
| 0  | 1 | 0 | 0  | 1  | 1  | 1 | 0  | 0  | 0  | 1  | 0  | 0  | 0  |
| 0  | 0 | 1 | 1  | 0  | 1  | 0 | 0  | 0  | 0  | 0  | 0  | 0  | 0  |
| 1  | 0 | 0 | 0  | 0  | 1  | 1 | 1  | 1  | 0  | 0  | 0  | 0  | 0  |
| 0  | 0 | 1 | 0  | 0  | 0  | 0 | 0  | 0  | 0  | 0  | 0  | 0  | 0  |
| 0  | 0 | 1 | 0  | 0  | 0  | 0 | 0  | 0  | 0  | 0  | 0  | 0  | 0  |
| 0  | 0 | 1 | 0  | 0  | 0  | 0 | 0  | 0  | 0  | 0  | 0  | 0  | 0  |
| 0  | 1 | 1 | 0  | 1  | 1  | 1 | 0  | 1  | 1  | 0  | 0  | 0  | 0  |
| 0  | 0 | 0 | 0  | 1  | 1  | 1 | 0  | 0  | 0  | 0  | 0  | 0  | 0  |
| 0  | 1 | 1 | NA | 0  | 1  | 0 | 0  | 0  | 1  | 0  | 0  | 0  | 0  |
| 0  | 1 | 0 | 0  | 0  | 0  | 0 | 0  | NA | NA | 0  | 0  | 0  | 0  |
| 0  | 0 | 0 | 0  | 1  | 1  | 1 | 0  | 0  | 0  | 0  | NA | NA | NA |
| 0  | 0 | 0 | 0  | 1  | 1  | 1 | 0  | 1  | 0  | 0  | 0  | 0  | 0  |
| 0  | 0 | 1 | 1  | 0  | 1  | 0 | 0  | 0  | 1  | 0  | 0  | 0  | 0  |
| 0  | 0 | 1 | 1  | 0  | 0  | 0 | 0  | 0  | 0  | 0  | 0  | 0  | 0  |
| 1  | 1 | 1 | 0  | 0  | 0  | 1 | 0  | 0  | NA | 0  | 0  | 0  | 0  |
| 0  | 1 | 0 | 0  | 1  | 1  | 1 | 0  | 0  | NA | 0  | 0  | 0  | 0  |
| 1  | 0 | 0 | NA | 1  | 1  | 1 | NA | NA | 0  | 1  | 0  | 0  | 0  |
| 0  | 0 | 0 | 0  | 1  | 1  | 1 | 0  | 1  | 0  | 0  | 0  | 0  | 0  |
| 1  | 0 | 0 | 0  | 1  | 1  | 1 | 0  | 0  | 0  | 0  | 2  | 1  | 2  |
| 0  | 0 | 0 | 0  | 1  | 1  | 1 | 1  | 0  | 0  | 0  | 1  | 2  | 1  |
| 0  | 0 | 0 | 0  | 0  | 0  | 0 | 0  | 0  | NA | 0  | 0  | 0  | 0  |
| 0  | 0 | 0 | 0  | 0  | 0  | 0 | 0  | 0  | NA | 0  | 0  | 0  | 0  |
| 0  | 0 | 1 | 0  | 1  | 1  | 1 | 0  | 0  | 1  | 0  | 0  | 0  | 0  |
| 0  | 0 | 1 | 0  | 0  | 0  | 0 | 0  | 0  | NA | 0  | 0  | 0  | 0  |
| 0  | 0 | 1 | 0  | 0  | 1  | 0 | 0  | 0  | NA | 0  | 0  | 0  | 0  |
| 0  | 0 | 1 | 0  | 0  | 1  | 0 | 0  | 0  | 0  | 0  | 0  | 0  | 0  |
| 1  | 0 | 0 | 0  | 1  | 1  | 1 | 0  | 0  | 0  | 0  | 0  | 0  | 0  |
| 0  | 0 | 1 | 0  | 0  | 1  | 1 | 1  | 0  | 0  | 0  | 1  | 1  | 1  |
| 1  | 0 | 0 | 0  | 0  | 0  | 0 | 0  | 0  | NA | 0  | 0  | 0  | 0  |
| 0  | 0 | 1 | 0  | 0  | 0  | 1 | 0  | 0  | NA | 0  | 2  | 2  | 1  |
| 0  | 0 | 1 | 1  | 0  | 1  | 0 | 0  | 0  | 1  | 0  | 1  | 2  | 1  |
| 0  | 0 | 1 | 1  | 0  | 0  | 0 | 0  | 0  | NA | 0  | 0  | 0  | 0  |
| 1  | 0 | 0 | 0  | 1  | 1  | 0 | 0  | 0  | 0  | 0  | 0  | 0  | 0  |
| 0  | 0 | 1 | 0  | 0  | 0  | 0 | 0  | 0  | 0  | 0  | 0  | 0  | 0  |
| 0  | 0 | 1 | 0  | 0  | 1  | 0 | 0  | 0  | 0  | 0  | 0  | 0  | 0  |
| 0  | 0 | 1 | 0  | 0  | 0  | 0 | 0  | 0  | NA | 0  | 0  | 0  | 0  |
| 0  | 0 | 1 | 0  | 0  | 0  | 0 | 0  | 0  | 0  | 0  | 0  | 0  | 0  |
| 0  | 0 | 1 | 0  | 0  | 1  | 0 | 0  | 0  | 0  | 0  | 0  | 0  | 0  |
| 0  | 0 | 1 | 1  | 1  | 0  | 1 | 0  | 0  | 1  | 0  | 1  | 1  | 2  |
| 1  | 0 | 1 | 0  | 0  | 0  | 0 | 0  | 0  | NA | 0  | 0  | 0  | 0  |
| 0  | 0 | 1 | 0  | 0  | 1  | 0 | 0  | 0  | 0  | 0  | 0  | 0  | 0  |
| 0  | 0 | 1 | 1  | 1  | 1  | 1 | 0  | 1  | 1  | 0  | 2  | 1  | 2  |
| 0  | 0 | 0 | 0  | 0  | 0  | 0 | 0  | 0  | NA | 0  | 1  | 2  | 1  |











|   |   |   |   |   |   |   |   |   |   |   |   |   |   |
|---|---|---|---|---|---|---|---|---|---|---|---|---|---|
| 0 | 0 | 1 | 0 | 0 | 1 | 1 | 0 | 0 | 0 | 0 | 0 | 0 | 0 |
| 0 | 0 | 1 | 0 | 0 | 1 | 1 | 0 | 0 | 0 | 0 | 0 | 0 | 0 |
| 0 | 0 | 0 | 1 | 1 | 1 | 1 | 0 | 0 | 1 | 0 | 0 | 0 | 0 |
| 0 | 0 | 1 | 0 | 0 | 0 | 0 | 0 | 0 | 0 | 0 | 0 | 0 | 0 |
| 0 | 0 | 1 | 0 | 0 | 1 | 0 | 0 | 0 | 0 | 0 | 0 | 0 | 0 |
| 0 | 0 | 1 | 1 | 1 | 1 | 1 | 0 | 1 | 1 | 0 | 0 | 0 | 0 |
| 0 | 0 | 1 | 0 | 1 | 1 | 1 | 1 | 0 | 0 | 0 | 1 | 1 | 1 |
| 0 | 0 | 1 | 0 | 1 | 1 | 1 | 1 | 0 | 0 | 0 | 1 | 1 | 1 |
| 1 | 0 | 1 | 1 | 1 | 1 | 0 | 0 | 0 | 0 | 0 | 0 | 0 | 0 |
| 1 | 0 | 1 | 1 | 1 | 1 | 0 | 0 | 0 | 0 | 0 | 0 | 0 | 0 |
| 0 | 0 | 1 | 0 | 0 | 0 | 1 | 1 | 0 | 0 | 0 | 2 | 2 | 1 |
| 0 | 0 | 1 | 0 | 0 | 0 | 1 | 1 | 0 | 0 | 0 | 2 | 2 | 1 |
| 0 | 0 | 1 | 0 | 0 | 0 | 0 | 1 | 1 | 0 | 0 | 2 | 2 | 1 |
| 0 | 0 | 1 | 0 | 0 | 0 | 0 | 0 | 0 | 0 | 0 | 0 | 0 | 0 |
| 0 | 0 | 1 | 1 | 0 | 1 | 0 | 0 | 0 | 1 | 0 | 0 | 0 | 0 |
| 0 | 0 | 1 | 1 | 0 | 1 | 0 | 0 | 0 | 1 | 0 | 0 | 0 | 0 |
| 0 | 0 | 1 | 1 | 0 | 1 | 0 | 0 | 0 | 0 | 0 | 0 | 0 | 0 |
| 1 | 0 | 0 | 0 | 1 | 1 | 0 | 0 | 0 | 0 | 0 | 0 | 0 | 0 |
| 0 | 0 | 1 | 0 | 0 | 0 | 0 | 0 | 0 | 0 | 0 | 0 | 0 | 0 |
| 0 | 0 | 1 | 0 | 0 | 0 | 0 | 0 | 0 | 0 | 0 | 0 | 0 | 0 |
| 0 | 0 | 1 | 0 | 0 | 0 | 0 | 0 | 0 | 0 | 0 | 0 | 0 | 0 |
| 0 | 0 | 1 | 0 | 0 | 0 | 0 | 0 | 0 | 0 | 0 | 0 | 0 | 0 |
| 0 | 0 | 0 | 0 | 0 | 1 | 0 | 0 | 0 | 0 | 0 | 1 | 2 | 1 |
| 0 | 0 | 0 | 0 | 0 | 1 | 0 | 0 | 0 | 0 | 0 | 1 | 2 | 1 |
| 0 | 0 | 0 | 0 | 0 | 1 | 0 | 0 | 0 | 0 | 0 | 0 | 0 | 0 |
| 0 | 0 | 0 | 0 | 0 | 1 | 0 | 0 | 0 | 0 | 0 | 0 | 0 | 0 |
| 0 | 0 | 1 | 0 | 0 | 0 | 1 | 0 | 0 | 0 | 0 | 2 | 2 | 1 |
| 0 | 0 | 1 | 0 | 0 | 0 | 1 | 0 | 1 | 0 | 0 | 2 | 2 | 1 |
| 0 | 0 | 1 | 0 | 0 | 1 | 0 | 0 | 0 | 0 | 0 | 0 | 0 | 0 |
| 0 | 0 | 1 | 0 | 0 | 1 | 0 | 0 | 0 | 0 | 0 | 0 | 0 | 0 |
| 0 | 0 | 1 | 0 | 0 | 1 | 0 | 0 | 0 | 0 | 0 | 0 | 0 | 0 |
| 0 | 0 | 1 | 0 | 0 | 1 | 1 | 0 | 1 | 0 | 0 | 0 | 0 | 0 |
| 0 | 0 | 1 | 0 | 1 | 1 | 1 | 1 | 1 | 0 | 0 | 0 | 0 | 0 |
| 1 | 0 | 0 | 1 | 1 | 1 | 0 | 0 | 0 | 1 | 0 | 0 | 0 | 0 |
| 1 | 1 | 1 | 1 | 0 | 1 | 1 | 1 | 0 | 1 | 0 | 0 | 0 | 0 |
| 1 | 1 | 1 | 1 | 0 | 1 | 1 | 1 | 1 | 1 | 0 | 0 | 0 | 0 |
| 0 | 1 | 1 | 1 | 1 | 1 | 1 | 0 | 1 | 1 | 0 | 0 | 0 | 0 |
| 1 | 1 | 0 | 1 | 0 | 1 | 0 | 0 | 0 | 0 | 0 | 1 | 2 | 2 |
| 1 | 1 | 0 | 1 | 0 | 1 | 0 | 0 | 0 | 0 | 0 | 1 | 2 | 2 |
| 0 | 0 | 1 | 1 | 0 | 1 | 1 | 0 | 0 | 1 | 0 | 1 | 1 | 1 |
| 0 | 0 | 1 | 1 | 0 | 1 | 1 | 0 | 0 | 1 | 0 | 1 | 1 | 1 |
| 1 | 0 | 1 | 0 | 1 | 1 | 0 | 0 | 0 | 0 | 0 | 2 | 2 | 1 |
| 1 | 0 | 1 | 0 | 1 | 1 | 0 | 0 | 0 | 0 | 0 | 2 | 2 | 1 |
| 1 | 0 | 1 | 0 | 1 | 1 | 0 | 0 | 0 | 0 | 0 | 2 | 2 | 1 |
| 0 | 0 | 0 | 0 | 0 | 1 | 0 | 0 | 0 | 0 | 0 | 0 | 0 | 0 |
| 0 | 0 | 0 | 0 | 0 | 1 | 0 | 0 | 0 | 0 | 0 | 0 | 0 | 0 |
| 1 | 0 | 0 | 0 | 1 | 0 | 0 | 0 | 0 | 0 | 0 | 0 | 0 | 0 |
| 1 | 0 | 0 | 0 | 1 | 0 | 0 | 0 | 0 | 0 | 0 | 0 | 0 | 0 |
| 1 | 0 | 0 | 0 | 1 | 0 | 0 | 0 | 0 | 0 | 0 | 0 | 0 | 0 |
| 1 | 0 | 0 | 0 | 1 | 0 | 0 | 0 | 0 | 0 | 0 | 0 | 0 | 0 |
| 1 | 0 | 1 | 1 | 0 | 0 | 0 | 0 | 0 | 1 | 0 | 2 | 2 | 1 |

| tetformin.ev | probiot | periodontitis | recession | FHPDAC | pack/year | inctype_patie | nasal | CA19 | coded_ca19 | PDAC_stage |
|--------------|---------|---------------|-----------|--------|-----------|---------------|-------|------|------------|------------|
| 0            | 0       | 1             | NA        | 0      | 3         | 0             | 0     | 18   | -1         | 2          |
| 0            | 0       | 0             | 0         | 0      | 1         | 0             | 0     | 133  | 1          | 4          |
| 0            | 0       | 0             | 1         | 0      | 2         | 0             | 0     | 126  | 1          | 2          |
| 0            | 0       | 1             | 1         | 0      | 0         | 0             | 1     | 124  | 1          | 2          |
| 0            | 0       | 1             | 1         | 0      | 0         | 0             | 1     | 124  | 1          | 2          |
| 0            | 0       | 0             | 0         | 0      | 0         | 0             | 0     | 5170 | 1          | 2          |
| 0            | 0       | 1             | 0         | 0      | 3         | 0             | 0     | NA   | 0          | 1          |
| 0            | 0       | 1             | 0         | 0      | 3         | 0             | 0     | NA   | 0          | 1          |
| 0            | 0       | NA            | 0         | 0      | 0         | 0             | 0     | 0    | -1         | 2          |
| 2            | 0       | 0             | 0         | NA     | 0         | 0             | 0     | 55   | 1          | 2          |
| 2            | 0       | 0             | 0         | NA     | 0         | 0             | 0     | 55   | 1          | 2          |
| 0            | 0       | 1             | 1         | 0      | 0         | 0             | 0     | 2572 | 1          | 2          |
| 0            | 0       | 1             | 1         | 0      | 3         | 0             | 1     | 151  | 1          | 3          |
| 1            | 0       | 0             | 0         | 0      | 1         | 0             | 0     | 25   | -1         | 2          |
| 1            | 0       | 0             | 0         | 0      | 1         | 0             | 0     | 25   | -1         | 2          |
| 1            | 0       | 0             | 0         | 0      | 0         | 0             | 0     | 629  | 1          | 4          |
| 1            | 0       | 0             | 0         | 0      | 0         | 0             | 0     | 629  | 1          | 4          |
| 0            | 0       | 0             | 0         | 1      | 3         | 2             | 0     | 90   | 1          | 2          |
| 0            | 0       | 0             | 0         | 0      | 3         | 0             | 0     | 326  | 1          | 2          |
| 0            | 0       | 1             | 1         | 0      | 2         | NA            | 1     | 319  | 1          | 2          |
| 0            | 0       | 1             | 0         | 0      | 0         | 0             | 0     | 143  | 1          | 2          |
| 0            | 0       | 0             | 0         | 0      | 0         | 0             | 0     | 0    | -1         | 3          |
| 0            | 0       | 0             | 0         | 0      | 0         | 0             | 0     | 0    | -1         | 3          |
| 1            | 0       | 0             | 0         | 0      | 0         | 0             | 0     | 1049 | 1          | 2          |
| 0            | 0       | 1             | 0         | 0      | 3         | 0             | 0     | 2219 | 1          | 4          |
| 0            | 0       | 0             | 1         | 0      | 1         | 0             | 0     | 449  | 1          | 4          |
| 0            | 1       | 1             | 1         | 0      | 0         | 0             | 1     | 1    | -1         | 1          |
| 0            | 0       | NA            | NA        | 0      | 3         | 0             | 0     | 74   | 1          | NA         |
| 0            | 0       | 0             | 1         | 0      | 0         | 0             | 1     | NA   | 0          | NA         |
| 0            | 0       | 0             | 1         | 0      | 0         | 0             | 1     | NA   | 0          | NA         |
| 0            | 0       | 0             | 0         | 0      | 0         | 1             | 0     | 1    | -1         | NA         |
| 0            | 0       | 1             | 1         | 0      | 0         | 0             | 0     | 4    | -1         | NA         |
| 0            | 0       | 1             | 0         | 0      | 2         | 0             | 0     | 1    | -1         | NA         |
| 0            | 0       | 0             | 1         | 0      | 3         | 2             | 0     | NA   | 0          | NA         |
| 2            | 0       | NA            | 0         | 0      | 0         | 0             | 0     | 11   | -1         | NA         |
| 2            | 0       | NA            | 0         | 0      | 0         | 0             | 0     | 11   | -1         | NA         |
| 0            | 0       | 0             | 1         | 0      | 0         | 0             | 0     | 17   | -1         | NA         |
| 0            | 0       | 0             | 0         | 1      | 0         | 0             | 0     | 12   | -1         | NA         |
| 0            | 0       | 0             | 0         | 0      | 2         | 0             | 0     | NA   | 0          | NA         |
| 1            | 0       | NA            | 0         | 0      | 2         | 0             | 0     | NA   | 0          | NA         |
| 0            | 0       | 0             | 0         | 0      | 3         | 0             | 1     | NA   | 0          | NA         |
| 0            | 0       | 0             | 0         | 0      | 3         | 0             | 0     | 8    | -1         | NA         |
| 0            | 0       | 0             | 0         | 0      | 0         | 0             | 0     | 5    | -1         | NA         |
| 0            | 0       | 0             | 0         | 0      | 1         | 0             | 0     | 9    | -1         | NA         |
| 0            | 0       | 0             | 0         | 0      | 2         | 0             | 0     | NA   | 0          | NA         |
| 0            | 0       | 0             | 0         | 0      | 0         | 0             | 1     | NA   | 0          | NA         |
| 0            | 0       | 0             | 0         | 0      | 0         | 0             | 0     | 15   | -1         | NA         |
| 0            | 0       | 0             | 0         | 0      | 0         | 0             | 0     | 6    | -1         | NA         |
| 0            | 0       | 0             | 0         | 1      | 3         | 0             | 0     | NA   | 0          | NA         |
| 0            | 0       | 1             | 1         | 0      | 3         | 0             | 0     | 6    | -1         | NA         |
| 0            | 0       | NA            | 0         | 0      | 2         | 0             | 1     | NA   | 0          | NA         |
| 0            | 0       | 0             | 0         | 0      | 3         | 0             | 1     | 0    | -1         | NA         |
| 1            | 0       | 0             | 0         | NA     | 2         | NA            | 0     | NA   | 0          | NA         |
| 0            | 0       | 0             | 0         | 0      | 3         | 2             | 0     | NA   | 0          | NA         |
| 2            | 0       | 0             | 1         | 0      | 3         | NA            | 1     | NA   | 0          | NA         |
| 0            | 0       | 1             | 0         | 0      | 3         | 1             | 0     | NA   | 0          | NA         |
| 0            | 0       | 1             | 1         | 0      | 2         | 2             | 0     | NA   | 0          | NA         |
| 0            | 0       | 1             | 1         | 0      | 3         | 0             | 0     | NA   | 0          | NA         |
| 0            | 0       | 1             | 0         | 0      | 3         | NA            | 0     | NA   | 0          | NA         |
| 1            | 0       | 1             | 1         | 0      | 2         | NA            | 0     | NA   | 0          | NA         |
| 1            | 0       | 0             | 0         | 0      | 1         | NA            | 0     | NA   | 0          | NA         |
| 1            | 0       | 0             | 0         | 0      | 1         | NA            | 0     | NA   | 0          | NA         |
| 0            | 0       | 0             | 1         | 0      | 2         | 1             | 0     | NA   | 0          | NA         |
| 2            | 0       | 1             | 1         | 0      | 3         | 2             | 0     | NA   | 0          | NA         |
| 0            | 0       | 1             | NA        | 0      | 3         | 1             | 0     | NA   | 0          | NA         |
| 0            | 0       | 1             | NA        | 0      | 3         | 1             | 0     | NA   | 0          | NA         |
| 0            | 0       | 0             | 0         | 0      | 1         | 2             | 0     | NA   | 0          | NA         |
| 2            | 0       | 0             | 0         | 0      | 2         | NA            | 0     | NA   | 0          | NA         |
| 0            | 0       | 1             | 0         | 0      | 0         | NA            | 0     | NA   | 0          | NA         |
| 1            | 0       | 0             | 1         | 0      | 2         | NA            | 0     | NA   | 0          | NA         |
| 2            | 0       | 0             | 0         | 0      | 2         | NA            | 0     | NA   | 0          | NA         |
| 0            | 0       | 1             | 0         | 0      | 3         | 2             | 0     | NA   | 0          | NA         |
| 1            | 0       | 0             | 0         | 0      | 2         | NA            | 0     | NA   | 0          | NA         |
| 0            | 0       | 1             | 1         | 0      | 3         | 0             | 0     | NA   | 0          | NA         |
| 0            | 0       | 1             | 1         | 0      | 0         | 0             | 0     | 1033 | 1          | 2          |
| 0            | 0       | 1             | 1         | 0      | 0         | 0             | 0     | 1033 | 1          | 2          |
| 0            | 1       | 0             | 0         | 0      | 2         | 0             | 1     | 495  | 1          | 2          |
| 0            | 0       | NA            | 1         | 0      | 0         | 0             | 0     | 4862 | 1          | 4          |
| 0            | 0       | NA            | 1         | 0      | 0         | 0             | 0     | 4862 | 1          | 4          |
| 0            | 0       | 0             | 0         | 0      | 1         | 0             | 0     | NA   | 0          | 1          |
| 0            | 0       | 0             | 1         | 0      | 0         | 0             | 1     | 3537 | 1          | 2          |
| 1            | 0       | 0             | 1         | 0      | 0         | 0             | 0     | 72   | 1          | 4          |
| 1            | 0       | 0             | 1         | 0      | 0         | 0             | 0     | NA   | 0          | 1          |
| 0            | 0       | 0             | 0         | 0      | 1         | 0             | 0     | NA   | 0          | 2          |
| 0            | 0       | 0             | 1         | 0      | 0         | 0             | 0     | 760  | 1          | 3          |
| 1            | 0       | 0             | 1         | 1      | 3         | 0             | 1     | 19   | -1         | 1          |
| 0            | 0       | 0             | 0         | 0      | 1         | 0             | 0     | NA   | 0          | 1          |

|    |    |    |    |    |   |    |    |       |    |    |
|----|----|----|----|----|---|----|----|-------|----|----|
| 0  | 0  | 0  | 0  | 0  | 0 | 0  | 0  | 9810  | 1  | 3  |
| 0  | 0  | 0  | 0  | 0  | 0 | 0  | 0  | 348   | 1  | 3  |
| 0  | 0  | 0  | 0  | 0  | 1 | 0  | 0  | 13617 | 1  | 4  |
| 0  | 0  | 0  | 1  | 0  | 0 | 0  | 0  | 419   | 1  | 2  |
| 0  | 0  | 0  | 1  | 0  | 0 | 0  | 0  | 419   | 1  | 2  |
| 1  | 0  | 0  | 1  | 0  | 0 | 0  | 1  | 34    | -1 | 4  |
| 0  | 0  | 0  | 0  | 0  | 0 | 0  | 0  | 351   | 1  | 3  |
| 0  | 0  | 0  | 0  | 0  | 1 | NA | 0  | NA    | 0  | 3  |
| 0  | 0  | 0  | 0  | 0  | 0 | 0  | 0  | 455   | 1  | 4  |
| 0  | 0  | 1  | 0  | 0  | 1 | 0  | 0  | NA    | 0  | 2  |
| 0  | 0  | 1  | 0  | 0  | 1 | 0  | 0  | NA    | 0  | 2  |
| 0  | 0  | 1  | 1  | 1  | 3 | NA | 0  | 36    | -1 | 4  |
| 0  | 0  | 0  | 1  | NA | 0 | 0  | NA | 0     | -1 | 3  |
| 0  | 0  | 0  | 0  | 0  | 0 | NA | 0  | 5459  | 1  | 4  |
| 0  | 0  | 0  | 0  | 0  | 3 | 0  | 0  | 17031 | 1  | 3  |
| 1  | 0  | 0  | 0  | NA | 2 | 0  | 0  | 192   | 1  | 4  |
| 0  | 0  | 1  | 1  | NA | 0 | 0  | 0  | 489   | 1  | 4  |
| 0  | 0  | 0  | NA | NA | 0 | 0  | 0  | 1505  | 1  | 3  |
| 0  | 0  | 1  | 0  | NA | 0 | 0  | 0  | 26511 | 1  | 4  |
| 1  | 0  | 1  | 1  | NA | 1 | 1  | 1  | 208   | 1  | 3  |
| NA | 0  | 0  | 0  | NA | 1 | 0  | 0  | NA    | 0  | 4  |
| 0  | 0  | 0  | 0  | 0  | 2 | NA | 0  | NA    | 0  | 4  |
| 0  | 0  | 1  | 1  | 0  | 1 | NA | 0  | NA    | 0  | 3  |
| 0  | 0  | 1  | 1  | 0  | 1 | NA | 0  | 98    | 1  | 4  |
| 0  | 0  | 0  | 0  | 0  | 1 | NA | 0  | NA    | 0  | 4  |
| 1  | 0  | 0  | 0  | 1  | 0 | NA | 0  | NA    | 0  | 3  |
| 0  | 0  | 0  | 1  | 0  | 3 | NA | 0  | NA    | 0  | 4  |
| 0  | 0  | 0  | 0  | 0  | 0 | 0  | 0  | 1     | -1 | NA |
| 0  | 0  | 0  | 1  | 0  | 0 | 0  | 0  | 30    | -1 | NA |
| 0  | 0  | 0  | 0  | 0  | 3 | 0  | 0  | NA    | 0  | NA |
| 0  | NA | 0  | 0  | 0  | 0 | 0  | 0  | NA    | 0  | NA |
| 0  | 0  | 0  | 0  | 0  | 0 | 0  | 0  | 5     | -1 | NA |
| 0  | 0  | 0  | 1  | 0  | 0 | 0  | 1  | NA    | 0  | NA |
| 0  | 1  | 0  | 1  | 0  | 0 | 0  | 0  | 8     | -1 | NA |
| 0  | 0  | 0  | 0  | 0  | 3 | 0  | 0  | 15    | -1 | NA |
| 0  | 0  | 0  | 0  | 0  | 1 | 0  | 1  | NA    | 0  | NA |
| 0  | 0  | 1  | 1  | 0  | 0 | 0  | 0  | 0     | -1 | NA |
| 0  | 0  | 0  | 0  | 0  | 0 | 0  | 0  | 6     | -1 | NA |
| 0  | 1  | 0  | 0  | 0  | 2 | 0  | 0  | 13    | -1 | NA |
| 0  | 0  | 0  | 0  | 0  | 1 | 0  | 0  | 28    | -1 | NA |
| 0  | 0  | 1  | 0  | 0  | 3 | 0  | 1  | 15    | -1 | NA |
| 0  | 0  | 0  | 0  | 0  | 0 | 0  | 0  | 7     | -1 | NA |
| 1  | 0  | 1  | 0  | 0  | 0 | 0  | 0  | NA    | 0  | NA |
| 0  | 0  | 0  | 0  | 0  | 3 | 0  | 0  | 11    | -1 | NA |
| 0  | 0  | 0  | 0  | 0  | 1 | 0  | 0  | NA    | 0  | NA |
| 0  | 0  | 0  | 0  | 0  | 1 | 0  | 0  | NA    | 0  | NA |
| 0  | 0  | 1  | 1  | 0  | 0 | 0  | 0  | 17    | -1 | NA |
| 0  | 0  | 1  | 1  | 0  | 1 | NA | 0  | 4     | -1 | NA |
| 0  | 0  | 1  | 0  | 0  | 1 | 0  | 0  | 0     | -1 | NA |
| 0  | 0  | 0  | 1  | 0  | 0 | 0  | 0  | 6     | -1 | NA |
| 0  | 0  | 0  | 0  | 0  | 0 | NA | 0  | 13    | -1 | NA |
| NA | 0  | 1  | 0  | 0  | 0 | 0  | 0  | NA    | 0  | NA |
| 0  | 0  | 0  | 1  | 0  | 3 | NA | 0  | 8     | -1 | NA |
| 0  | 1  | 1  | 1  | 0  | 1 | NA | 0  | NA    | 0  | NA |
| 0  | 0  | 0  | 0  | 0  | 3 | NA | 0  | NA    | 0  | NA |
| 0  | 0  | 0  | 0  | 1  | 1 | NA | 0  | 0     | -1 | NA |
| 0  | 0  | 1  | 0  | 0  | 0 | 1  | 0  | NA    | 0  | NA |
| 0  | 0  | 0  | 0  | 1  | 1 | 2  | 0  | NA    | 0  | NA |
| 0  | 0  | 0  | 0  | 1  | 0 | NA | 0  | NA    | 0  | NA |
| 0  | 0  | 1  | 0  | 0  | 1 | 2  | 0  | NA    | 0  | NA |
| 0  | 0  | 1  | 1  | 0  | 0 | 2  | 0  | NA    | 0  | NA |
| 1  | 0  | 0  | 0  | 0  | 2 | 2  | 0  | NA    | 0  | NA |
| 0  | 0  | 1  | NA | 0  | 3 | 0  | 0  | 18    | -1 | 2  |
| 0  | 0  | 0  | 0  | 0  | 1 | 0  | 0  | 133   | 1  | 4  |
| 0  | 0  | 0  | 1  | 0  | 2 | 0  | 0  | 126   | 1  | 2  |
| 0  | 0  | 1  | 1  | 0  | 0 | 0  | 1  | 124   | 1  | 2  |
| 0  | 0  | 0  | 0  | 0  | 0 | 0  | 0  | 5170  | 1  | 2  |
| 0  | 0  | 1  | 0  | 0  | 3 | 0  | 0  | NA    | 0  | 1  |
| 0  | 0  | NA | 0  | 0  | 0 | 0  | 0  | 0     | -1 | 2  |
| 2  | 0  | 0  | 0  | NA | 0 | 0  | 0  | 55    | 1  | 2  |
| 0  | 0  | 1  | 1  | 0  | 0 | 0  | 0  | 2572  | 1  | 2  |
| 0  | 0  | 1  | 1  | 0  | 3 | 0  | 1  | 151   | 1  | 3  |
| 1  | 0  | 0  | 0  | 0  | 1 | 0  | 0  | 25    | -1 | 2  |
| 1  | 0  | 0  | 0  | 0  | 0 | 0  | 0  | 629   | 1  | 4  |
| 0  | 0  | 0  | 0  | 1  | 3 | 2  | 0  | 90    | 1  | 2  |
| 0  | 0  | 0  | 0  | 0  | 3 | 0  | 0  | 326   | 1  | 2  |
| 0  | 0  | 1  | 1  | 0  | 2 | NA | 1  | 319   | 1  | 2  |
| 0  | 0  | 1  | 0  | 0  | 0 | 0  | 0  | 143   | 1  | 2  |
| 0  | 0  | 0  | 0  | 0  | 0 | 0  | 0  | 0     | -1 | 3  |
| 1  | 0  | 0  | 0  | 0  | 0 | 0  | 0  | 1049  | 1  | 2  |
| 0  | 0  | 1  | 0  | 0  | 3 | 0  | 0  | 2219  | 1  | 4  |
| 0  | 0  | 0  | 1  | 0  | 1 | 0  | 0  | 449   | 1  | 4  |
| 0  | 1  | 1  | 1  | 0  | 0 | 0  | 1  | 1     | -1 | 1  |
| 0  | 0  | NA | NA | 0  | 3 | 0  | 0  | 74    | 1  | NA |
| 0  | 0  | 0  | 1  | 0  | 0 | 0  | 1  | NA    | 0  | NA |
| 0  | 0  | 0  | 0  | 0  | 0 | 1  | 0  | 1     | -1 | NA |
| 0  | 0  | 1  | 1  | 0  | 0 | 0  | 0  | 4     | -1 | NA |
| 0  | 0  | 1  | 0  | 0  | 2 | 0  | 0  | 1     | -1 | NA |
| 0  | 0  | 0  | 1  | 0  | 3 | 2  | 0  | NA    | 0  | NA |
| 2  | 0  | NA | 0  | 0  | 0 | 0  | 0  | 11    | -1 | NA |

|   |    |    |    |    |   |    |    |       |    |    |
|---|----|----|----|----|---|----|----|-------|----|----|
| 0 | 0  | 0  | 1  | 0  | 0 | 0  | 0  | 17    | -1 | NA |
| 0 | 0  | 0  | 0  | 1  | 0 | 0  | 0  | 12    | -1 | NA |
| 0 | 0  | 0  | 0  | 0  | 2 | 0  | 0  | NA    | 0  | NA |
| 1 | 0  | NA | 0  | 0  | 2 | 0  | 0  | NA    | 0  | NA |
| 0 | 0  | 0  | 0  | 0  | 3 | 0  | 1  | NA    | 0  | NA |
| 0 | 0  | 0  | 0  | 0  | 3 | 0  | 0  | 8     | -1 | NA |
| 0 | 0  | 0  | 0  | 0  | 0 | 0  | 0  | 5     | -1 | NA |
| 0 | 0  | 0  | 0  | 0  | 1 | 0  | 0  | 9     | -1 | NA |
| 0 | 0  | 0  | 0  | 0  | 2 | 0  | 0  | NA    | 0  | NA |
| 0 | 0  | 0  | 0  | 0  | 0 | 0  | 1  | NA    | 0  | NA |
| 0 | 0  | 0  | 0  | 0  | 0 | 0  | 0  | 15    | -1 | NA |
| 0 | 0  | 0  | 0  | 0  | 0 | 0  | 0  | 6     | -1 | NA |
| 0 | 0  | 0  | 0  | 1  | 3 | 0  | 0  | NA    | 0  | NA |
| 0 | 0  | 1  | 1  | 0  | 3 | 0  | 0  | 6     | -1 | NA |
| 0 | 0  | NA | 0  | 0  | 2 | 0  | 1  | NA    | 0  | NA |
| 0 | 0  | 0  | 0  | 0  | 3 | 0  | 1  | 0     | -1 | NA |
| 1 | 0  | 0  | 0  | NA | 2 | NA | 0  | NA    | 0  | NA |
| 0 | 0  | 0  | 0  | 0  | 3 | 2  | 0  | NA    | 0  | NA |
| 0 | 0  | 1  | 0  | 0  | 3 | 1  | 0  | NA    | 0  | NA |
| 0 | 0  | 1  | 1  | 0  | 3 | 0  | 0  | NA    | 0  | NA |
| 1 | 0  | 0  | 0  | 0  | 1 | NA | 0  | NA    | 0  | NA |
| 2 | 0  | 1  | 1  | 0  | 3 | 2  | 0  | NA    | 0  | NA |
| 0 | 0  | 1  | NA | 0  | 3 | 1  | 0  | NA    | 0  | NA |
| 0 | 0  | 1  | 1  | 0  | 3 | 0  | 0  | NA    | 0  | NA |
| 0 | 0  | 1  | 1  | 0  | 0 | 0  | 0  | 1033  | 1  | 2  |
| 0 | 1  | 0  | 0  | 0  | 2 | 0  | 1  | 495   | 1  | 2  |
| 0 | 0  | NA | 1  | 0  | 0 | 0  | 0  | 4862  | 1  | 4  |
| 0 | 0  | 0  | 0  | 0  | 1 | 0  | 0  | NA    | 0  | 1  |
| 0 | 0  | 0  | 1  | 0  | 0 | 0  | 1  | 3537  | 1  | 2  |
| 1 | 0  | 0  | 1  | 0  | 0 | 0  | 0  | 72    | 1  | 4  |
| 1 | 0  | 0  | 0  | 0  | 1 | 0  | 0  | 82    | 1  | 2  |
| 1 | 0  | 0  | 1  | 0  | 0 | 0  | 0  | NA    | 0  | 1  |
| 0 | 0  | 0  | 0  | 0  | 1 | 0  | 0  | NA    | 0  | 2  |
| 0 | 0  | 0  | 1  | 0  | 0 | 0  | 0  | 760   | -1 | 3  |
| 1 | 0  | 0  | 1  | 1  | 3 | 0  | 1  | 19    | -1 | 1  |
| 0 | 0  | 0  | 0  | 0  | 1 | 0  | 0  | NA    | 0  | 1  |
| 0 | 0  | 0  | 0  | 0  | 0 | 0  | 0  | 525   | 1  | 1  |
| 0 | 0  | 0  | 0  | 0  | 0 | 0  | 0  | 9810  | 1  | 3  |
| 0 | 0  | 0  | 0  | 0  | 0 | 0  | 0  | 348   | 1  | 3  |
| 0 | 0  | 0  | 0  | 0  | 1 | 0  | 0  | 13617 | 1  | 4  |
| 0 | 0  | 0  | 1  | 0  | 0 | 0  | 0  | 419   | 1  | 2  |
| 1 | 0  | 0  | 1  | 0  | 0 | 0  | 1  | 34    | -1 | 4  |
| 0 | 0  | 0  | 0  | 0  | 0 | 0  | 0  | 351   | 1  | 3  |
| 0 | 0  | 0  | 0  | 0  | 0 | 0  | 0  | 455   | -1 | 4  |
| 0 | 0  | 0  | 0  | 0  | 0 | 0  | 0  | 25    | -1 | 4  |
| 0 | 0  | 1  | 0  | 0  | 1 | 0  | 0  | NA    | 0  | 2  |
| 0 | 0  | 0  | 0  | 0  | 0 | 0  | 0  | 1     | -1 | NA |
| 0 | 1  | 0  | 1  | 0  | 2 | 0  | 0  | 7     | -1 | NA |
| 0 | 0  | 0  | 1  | 0  | 0 | 0  | 0  | 30    | -1 | NA |
| 0 | 0  | 0  | 0  | 0  | 3 | 0  | 0  | NA    | 0  | NA |
| 0 | NA | 0  | 0  | 0  | 0 | 0  | 0  | NA    | 0  | NA |
| 0 | 0  | 0  | 0  | 0  | 0 | 0  | 0  | 5     | -1 | NA |
| 0 | 0  | 0  | 0  | 0  | 0 | 0  | 0  | 7     | -1 | NA |
| 0 | 0  | 1  | 1  | 0  | 0 | 0  | 0  | NA    | 0  | NA |
| 0 | 0  | 1  | 1  | 0  | 0 | 0  | 0  | NA    | 0  | NA |
| 0 | 0  | 0  | 1  | 0  | 0 | 0  | 1  | NA    | 0  | NA |
| 0 | 1  | 0  | 1  | 0  | 0 | 0  | 0  | 8     | -1 | NA |
| 0 | 1  | 0  | 1  | 0  | 0 | 0  | 0  | 8     | -1 | NA |
| 0 | 0  | 0  | 0  | 0  | 3 | 0  | 0  | 15    | -1 | NA |
| 0 | 0  | 0  | 0  | 0  | 1 | 0  | 1  | NA    | 0  | NA |
| 0 | 0  | 1  | 1  | 0  | 0 | 0  | 0  | 0     | -1 | NA |
| 1 | 0  | 0  | NA | 0  | 0 | 0  | 0  | 22    | -1 | NA |
| 0 | 0  | 0  | 0  | 0  | 0 | 0  | 0  | 6     | -1 | NA |
| 0 | 1  | 0  | 0  | 0  | 2 | 0  | 0  | 13    | -1 | NA |
| 0 | 0  | 0  | 0  | 0  | 1 | 0  | 0  | 28    | -1 | NA |
| 0 | 0  | 1  | 0  | 0  | 3 | 0  | 1  | 15    | -1 | NA |
| 0 | 0  | 0  | 0  | 0  | 0 | 0  | 0  | 7     | -1 | NA |
| 0 | 0  | 0  | 0  | 0  | 1 | NA | 0  | NA    | 0  | NA |
| 1 | 0  | 1  | 0  | 0  | 0 | 0  | 0  | NA    | 0  | NA |
| 0 | 0  | 0  | 0  | 0  | 3 | 0  | 0  | 11    | -1 | NA |
| 0 | 0  | 0  | 0  | 0  | 3 | 0  | 0  | 11    | -1 | NA |
| 0 | 0  | 0  | 0  | 0  | 1 | 0  | 0  | NA    | 0  | NA |
| 0 | 0  | 1  | 0  | 0  | 0 | 1  | 0  | NA    | 0  | NA |
| 0 | 0  | 1  | 1  | 0  | 0 | 2  | 0  | NA    | 0  | NA |
| 0 | 0  | 0  | 1  | 0  | 0 | 2  | 0  | NA    | 0  | NA |
| 0 | 0  | 0  | 1  | 0  | 0 | 2  | NA | NA    | NA | NA |
| 0 | 0  | 1  | 1  | 0  | 0 | NA | NA | NA    | NA | NA |
| 0 | 0  | 0  | 0  | 0  | 0 | NA | NA | NA    | NA | NA |
| 0 | 0  | 0  | 0  | 0  | 0 | NA | NA | NA    | NA | NA |
| 0 | 0  | 0  | 0  | 1  | 3 | NA | NA | NA    | NA | NA |
| 0 | 0  | 0  | 0  | 0  | 3 | NA | NA | NA    | NA | NA |
| 0 | 0  | 0  | 0  | 0  | 3 | NA | NA | NA    | NA | NA |
| 0 | 0  | 1  | 1  | 0  | 2 | NA | NA | NA    | NA | NA |
| 0 | 0  | 1  | 1  | 0  | 2 | NA | NA | NA    | NA | NA |
| 1 | 0  | 0  | 0  | 0  | 0 | NA | NA | NA    | NA | NA |
| 0 | 1  | 0  | 0  | 0  | 0 | NA | NA | NA    | NA | NA |
| 0 | 1  | 1  | 1  | 0  | 0 | NA | NA | NA    | NA | NA |
| 1 | 0  | 0  | 0  | 0  | 2 | NA | NA | NA    | NA | NA |
| 0 | 0  | 1  | 0  | 0  | 3 | NA | NA | NA    | NA | NA |
| 0 | 0  | 1  | 0  | 0  | 3 | NA | NA | NA    | NA | NA |



|   |   |    |    |    |   |    |    |       |    |    |
|---|---|----|----|----|---|----|----|-------|----|----|
| 0 | 0 | 1  | NA | 0  | 3 | 0  | 0  | 18    | -1 | 2  |
| 0 | 0 | 0  | 0  | 0  | 1 | 0  | 0  | 133   | 1  | 4  |
| 0 | 0 | 0  | 1  | 0  | 2 | 0  | 0  | 126   | 1  | 2  |
| 0 | 0 | 1  | 1  | 0  | 0 | 0  | 1  | 124   | 1  | 2  |
| 0 | 0 | 0  | 0  | 0  | 0 | 0  | 0  | 5170  | 1  | 2  |
| 0 | 0 | 1  | 0  | 0  | 3 | 0  | 0  | NA    | 0  | 1  |
| 0 | 0 | NA | 0  | 0  | 0 | 0  | 0  | 0     | -1 | 2  |
| 2 | 0 | 0  | 0  | NA | 0 | 0  | 0  | 55    | 1  | 2  |
| 0 | 0 | 1  | 1  | 0  | 0 | 0  | 0  | 2572  | 1  | 2  |
| 0 | 0 | 1  | 1  | 0  | 3 | 0  | 1  | 151   | 1  | 3  |
| 1 | 0 | 0  | 0  | 0  | 1 | 0  | 0  | 25    | -1 | 2  |
| 1 | 0 | 0  | 0  | 0  | 0 | 0  | 0  | 629   | 1  | 4  |
| 0 | 0 | 0  | 0  | 1  | 3 | 2  | 0  | 90    | 1  | 2  |
| 0 | 0 | 0  | 0  | 0  | 3 | 0  | 0  | 326   | 1  | 2  |
| 0 | 0 | 1  | 1  | 0  | 2 | NA | 1  | 319   | 1  | 2  |
| 0 | 0 | 1  | 0  | 0  | 0 | 0  | 0  | 143   | 1  | 2  |
| 0 | 0 | 0  | 0  | 0  | 0 | 0  | 0  | 0     | -1 | 3  |
| 1 | 0 | 0  | 0  | 0  | 0 | 0  | 0  | 1049  | 1  | 2  |
| 0 | 0 | 1  | 0  | 0  | 3 | 0  | 0  | 2219  | 1  | 4  |
| 0 | 0 | 0  | 1  | 0  | 1 | 0  | 0  | 449   | 1  | 4  |
| 0 | 1 | 1  | 1  | 0  | 0 | 0  | 1  | 1     | -1 | 1  |
| 0 | 0 | NA | NA | 0  | 3 | 0  | 0  | 74    | 1  | NA |
| 0 | 0 | 0  | 1  | 0  | 0 | 0  | 1  | NA    | 0  | NA |
| 0 | 0 | 0  | 0  | 0  | 0 | 1  | 0  | 1     | -1 | NA |
| 0 | 0 | 1  | 1  | 0  | 0 | 0  | 0  | 4     | -1 | NA |
| 0 | 0 | 1  | 0  | 0  | 2 | 0  | 0  | 1     | -1 | NA |
| 0 | 0 | 0  | 1  | 0  | 3 | 2  | 0  | NA    | 0  | NA |
| 2 | 0 | NA | 0  | 0  | 0 | 0  | 0  | 11    | -1 | NA |
| 0 | 0 | 0  | 1  | 0  | 0 | 0  | 0  | 17    | -1 | NA |
| 0 | 0 | 0  | 0  | 1  | 0 | 0  | 0  | 12    | -1 | NA |
| 0 | 0 | 0  | 0  | 0  | 2 | 0  | 0  | NA    | 0  | NA |
| 1 | 0 | NA | 0  | 0  | 2 | 0  | 0  | NA    | 0  | NA |
| 0 | 0 | 0  | 0  | 0  | 3 | 0  | 1  | NA    | 0  | NA |
| 0 | 0 | 0  | 0  | 0  | 3 | 0  | 0  | 8     | -1 | NA |
| 0 | 0 | 0  | 0  | 0  | 0 | 0  | 0  | 5     | -1 | NA |
| 0 | 0 | 0  | 0  | 0  | 1 | 0  | 0  | 9     | -1 | NA |
| 0 | 0 | 0  | 0  | 0  | 2 | 0  | 0  | NA    | 0  | NA |
| 0 | 0 | 0  | 0  | 0  | 0 | 0  | 1  | NA    | 0  | NA |
| 0 | 0 | 0  | 0  | 0  | 0 | 0  | 0  | 15    | -1 | NA |
| 0 | 0 | 0  | 0  | 0  | 0 | 0  | 0  | 6     | -1 | NA |
| 0 | 0 | 0  | 0  | 1  | 3 | 0  | 0  | NA    | 0  | NA |
| 0 | 0 | 1  | 1  | 0  | 3 | 0  | 0  | 6     | -1 | NA |
| 0 | 0 | NA | 0  | 0  | 2 | 0  | 1  | NA    | 0  | NA |
| 0 | 0 | 0  | 0  | 0  | 3 | 0  | 1  | 0     | -1 | NA |
| 1 | 0 | 0  | 0  | NA | 2 | NA | 0  | NA    | 0  | NA |
| 0 | 0 | 0  | 0  | 0  | 3 | 2  | 0  | NA    | 0  | NA |
| 2 | 0 | 0  | 1  | 0  | 3 | NA | 1  | NA    | 0  | NA |
| 0 | 0 | 1  | 0  | 0  | 3 | 1  | 0  | NA    | 0  | NA |
| 0 | 0 | 1  | 1  | 0  | 3 | 0  | 0  | NA    | 0  | NA |
| 0 | 0 | 1  | 0  | 0  | 3 | NA | 0  | NA    | 0  | NA |
| 2 | 0 | 0  | 0  | 0  | 3 | NA | 0  | NA    | 0  | NA |
| 1 | 0 | 1  | 1  | 0  | 2 | NA | 0  | NA    | 0  | NA |
| 1 | 0 | 0  | 0  | 0  | 1 | NA | 0  | NA    | 0  | NA |
| 1 | 0 | 0  | 0  | 0  | 1 | NA | 0  | NA    | 0  | NA |
| 0 | 0 | 0  | 1  | 0  | 2 | 1  | 0  | NA    | 0  | NA |
| 2 | 0 | 1  | 1  | 0  | 3 | 2  | 0  | NA    | 0  | NA |
| 0 | 0 | 1  | NA | 0  | 3 | 1  | 0  | NA    | 0  | NA |
| 0 | 0 | 1  | NA | 0  | 3 | 1  | 0  | NA    | 0  | NA |
| 2 | 0 | 0  | 0  | 0  | 2 | NA | 0  | NA    | 0  | NA |
| 0 | 0 | 1  | 0  | 0  | 0 | NA | 0  | NA    | 0  | NA |
| 1 | 0 | 0  | 1  | 0  | 2 | NA | 0  | NA    | 0  | NA |
| 2 | 0 | 0  | 0  | 0  | 2 | NA | 0  | NA    | 0  | NA |
| 1 | 0 | 0  | 0  | 0  | 2 | NA | 0  | NA    | 0  | NA |
| 0 | 0 | 1  | 1  | 0  | 3 | 0  | 0  | NA    | 0  | NA |
| 0 | 0 | 1  | 1  | 0  | 0 | 0  | 0  | 1033  | 1  | 2  |
| 0 | 1 | 0  | 0  | 0  | 2 | 0  | 1  | 495   | 1  | 2  |
| 0 | 0 | NA | 1  | 0  | 0 | 0  | 0  | 4862  | 1  | 4  |
| 0 | 0 | 0  | 0  | 0  | 1 | 0  | 0  | NA    | 0  | 1  |
| 0 | 0 | 0  | 1  | 0  | 0 | 0  | 1  | 3537  | 1  | 2  |
| 1 | 0 | 0  | 1  | 0  | 0 | 0  | 0  | 72    | 1  | 4  |
| 1 | 0 | 0  | 1  | 0  | 0 | 0  | 0  | NA    | 0  | 1  |
| 0 | 0 | 0  | 0  | 0  | 1 | 0  | 0  | NA    | 0  | 2  |
| 0 | 0 | 0  | 1  | 0  | 0 | 0  | 0  | 760   | 1  | 3  |
| 1 | 0 | 0  | 1  | 1  | 3 | 0  | 1  | 19    | -1 | 1  |
| 0 | 0 | 0  | 0  | 0  | 1 | 0  | 0  | NA    | 0  | 1  |
| 0 | 0 | 0  | 0  | 0  | 0 | 0  | 0  | 9810  | 1  | 3  |
| 0 | 0 | 0  | 0  | 0  | 0 | 0  | 0  | 348   | 1  | 3  |
| 0 | 0 | 0  | 0  | 0  | 1 | 0  | 0  | 13617 | 1  | 4  |
| 0 | 0 | 0  | 1  | 0  | 0 | 0  | 0  | 419   | 1  | 2  |
| 1 | 0 | 0  | 1  | 0  | 0 | 0  | 1  | 34    | -1 | 4  |
| 0 | 0 | 0  | 0  | 0  | 0 | 0  | 0  | 351   | 1  | 3  |
| 0 | 0 | 0  | 0  | 0  | 1 | NA | 0  | NA    | 0  | 3  |
| 0 | 0 | 0  | 0  | 0  | 0 | 0  | 0  | 455   | 1  | 4  |
| 0 | 0 | 0  | 0  | 0  | 0 | 0  | 0  | NA    | NA | NA |
| 0 | 0 | 0  | 0  | 0  | 0 | 0  | 0  | NA    | NA | NA |
| 0 | 0 | 1  | 0  | 0  | 1 | 0  | 0  | NA    | 0  | 2  |
| 0 | 0 | 1  | 1  | 1  | 3 | NA | 0  | 36    | -1 | 4  |
| 0 | 0 | 0  | 1  | NA | 0 | 0  | NA | 0     | -1 | 3  |
| 0 | 0 | 0  | 0  | 0  | 0 | NA | 0  | 5459  | 1  | 4  |
| 0 | 0 | 0  | 0  | 0  | 2 | NA | 0  | NA    | 0  | 4  |

|   |    |    |    |    |    |    |   |      |    |    |
|---|----|----|----|----|----|----|---|------|----|----|
| 0 | 0  | 1  | 1  | 0  | 1  | NA | 0 | NA   | 0  | 3  |
| 0 | 0  | 1  | 1  | 0  | 1  | NA | 0 | 98   | 1  | 4  |
| 0 | 0  | 0  | 0  | 0  | 1  | NA | 0 | NA   | 0  | 4  |
| 1 | 0  | 0  | 0  | 1  | 0  | NA | 0 | NA   | 0  | 3  |
| 0 | 0  | 0  | 1  | 0  | 3  | NA | 0 | NA   | 0  | 4  |
| 0 | 0  | 0  | 0  | 0  | 0  | 0  | 0 | 1    | -1 | NA |
| 0 | 0  | 0  | 1  | 0  | 0  | 0  | 0 | 30   | -1 | NA |
| 0 | 0  | 0  | 0  | 0  | 3  | 0  | 0 | NA   | 0  | NA |
| 0 | NA | 0  | 0  | 0  | 0  | 0  | 0 | NA   | 0  | NA |
| 0 | 0  | 0  | 0  | 0  | 0  | 0  | 0 | 5    | -1 | NA |
| 0 | 0  | 0  | 1  | 0  | 0  | 0  | 1 | NA   | 0  | NA |
| 0 | 1  | 0  | 1  | 0  | 0  | 0  | 0 | 8    | -1 | NA |
| 0 | 0  | 0  | 0  | 0  | 3  | 0  | 0 | 15   | -1 | NA |
| 0 | 0  | 0  | 0  | 0  | 1  | 0  | 1 | NA   | 0  | NA |
| 0 | 0  | 1  | 1  | 0  | 0  | 0  | 0 | 0    | -1 | NA |
| 0 | 0  | 0  | 0  | 0  | 0  | 0  | 0 | 6    | -1 | NA |
| 0 | 1  | 0  | 0  | 0  | 2  | 0  | 0 | 13   | -1 | NA |
| 0 | 0  | 0  | 0  | 0  | 1  | 0  | 0 | 28   | -1 | NA |
| 0 | 0  | 1  | 0  | 0  | 3  | 0  | 1 | 15   | -1 | NA |
| 0 | 0  | 0  | 0  | 0  | 0  | 0  | 0 | 7    | -1 | NA |
| 1 | 0  | 1  | 0  | 0  | 0  | 0  | 0 | NA   | 0  | NA |
| 0 | 0  | 0  | 0  | 0  | 3  | 0  | 0 | 11   | -1 | NA |
| 0 | 0  | 0  | 0  | 0  | 1  | 0  | 0 | NA   | 0  | NA |
| 0 | 0  | 1  | 1  | 0  | 1  | NA | 0 | 4    | -1 | NA |
| 0 | 0  | 0  | 0  | 0  | 0  | NA | 0 | 13   | -1 | NA |
| 0 | 0  | 0  | 1  | 0  | 3  | NA | 0 | 8    | -1 | NA |
| 0 | 1  | 1  | 1  | 0  | 1  | NA | 0 | NA   | 0  | NA |
| 0 | 0  | 0  | 0  | 0  | 3  | NA | 0 | NA   | 0  | NA |
| 0 | 0  | 0  | 0  | 1  | 1  | NA | 0 | 0    | -1 | NA |
| 0 | 0  | 1  | 0  | 0  | 0  | 1  | 0 | NA   | 0  | NA |
| 0 | 0  | 1  | 0  | 0  | 1  | 2  | 0 | NA   | 0  | NA |
| 0 | 0  | 1  | 1  | 0  | 0  | 2  | 0 | NA   | 0  | NA |
| 0 | 0  | 1  | NA | 0  | 3  | 0  | 0 | 18   | -1 | 2  |
| 0 | 0  | 0  | 0  | 0  | 1  | 0  | 0 | 133  | 1  | 4  |
| 0 | 0  | 0  | 1  | 0  | 2  | 0  | 0 | 126  | 1  | 2  |
| 0 | 0  | 1  | 1  | 0  | 0  | 0  | 1 | 124  | 1  | 2  |
| 0 | 0  | 0  | 0  | 0  | 0  | 0  | 0 | 5170 | 1  | 2  |
| 0 | 0  | 1  | 0  | 0  | 3  | 0  | 0 | NA   | 0  | 1  |
| 0 | 0  | NA | 0  | 0  | 0  | 0  | 0 | 0    | -1 | 2  |
| 2 | 0  | 0  | 0  | NA | 0  | 0  | 0 | 55   | 1  | 2  |
| 0 | 0  | 1  | 1  | 0  | 0  | 0  | 0 | 2572 | 1  | 2  |
| 0 | 0  | 1  | 1  | 0  | 3  | 0  | 1 | 151  | 1  | 3  |
| 1 | 0  | 0  | 0  | 0  | 1  | 0  | 0 | 25   | -1 | 2  |
| 1 | 0  | 0  | 0  | 0  | 0  | 0  | 0 | 629  | 1  | 4  |
| 0 | 0  | 0  | 0  | 1  | 3  | 2  | 0 | 90   | 1  | 2  |
| 0 | 0  | 0  | 0  | 0  | 3  | 0  | 0 | 326  | 1  | 2  |
| 0 | 0  | 1  | 1  | 0  | 2  | NA | 1 | 319  | 1  | 2  |
| 0 | 0  | 1  | 0  | 0  | 0  | 0  | 0 | 143  | 1  | 2  |
| 0 | 0  | 0  | 0  | 0  | 0  | 0  | 0 | 0    | -1 | 3  |
| 1 | 0  | 0  | 0  | 0  | 0  | 0  | 0 | 1049 | 1  | 2  |
| 0 | 0  | 1  | 0  | 0  | 3  | 0  | 0 | 2219 | 1  | 4  |
| 0 | 0  | 0  | 1  | 0  | 1  | 0  | 0 | 449  | 1  | 4  |
| 0 | 1  | 1  | 1  | 0  | 0  | 0  | 1 | 1    | -1 | 1  |
| 0 | 0  | NA | NA | 0  | 3  | 0  | 0 | 74   | 1  | NA |
| 0 | 0  | 0  | 1  | 0  | 0  | 0  | 1 | NA   | 0  | NA |
| 0 | 0  | 0  | 0  | 0  | 0  | 1  | 0 | 1    | -1 | NA |
| 0 | 0  | 1  | 1  | 0  | 0  | 0  | 0 | 4    | -1 | NA |
| 0 | 0  | 1  | 0  | 0  | 2  | 0  | 0 | 1    | -1 | NA |
| 0 | 0  | 0  | 1  | 0  | 3  | 2  | 0 | NA   | 0  | NA |
| 2 | 0  | NA | 0  | 0  | 0  | 0  | 0 | 11   | -1 | NA |
| 0 | 0  | 0  | 1  | 0  | 0  | 0  | 0 | 17   | -1 | NA |
| 0 | 0  | 0  | 0  | 1  | 0  | 0  | 0 | 12   | -1 | NA |
| 0 | 0  | 0  | 0  | 0  | 2  | 0  | 0 | NA   | 0  | NA |
| 1 | 0  | NA | 0  | 0  | 2  | 0  | 0 | NA   | 0  | NA |
| 0 | 0  | 0  | 0  | 0  | 3  | 0  | 1 | NA   | 0  | NA |
| 0 | 0  | 0  | 0  | 0  | 3  | 0  | 0 | 8    | -1 | NA |
| 0 | 0  | 0  | 0  | 0  | 0  | 0  | 0 | 5    | -1 | NA |
| 0 | 0  | 0  | 0  | 0  | 1  | 0  | 0 | 9    | -1 | NA |
| 0 | 0  | 0  | 0  | 0  | 2  | 0  | 0 | NA   | 0  | NA |
| 0 | 0  | 0  | 0  | 0  | 0  | 0  | 1 | NA   | 0  | NA |
| 0 | 0  | 0  | 0  | 0  | 0  | 0  | 0 | 15   | -1 | NA |
| 0 | 0  | 0  | 0  | 0  | 0  | 0  | 0 | 6    | -1 | NA |
| 0 | 0  | 0  | 0  | 1  | 3  | 0  | 0 | NA   | 0  | NA |
| 0 | 0  | 1  | 1  | 0  | 3  | 0  | 0 | 6    | -1 | NA |
| 0 | 0  | NA | 0  | 0  | 2  | 0  | 1 | NA   | 0  | NA |
| 0 | 0  | 0  | 0  | 0  | 3  | 0  | 1 | 0    | -1 | NA |
| 1 | 0  | 0  | 0  | NA | 2  | NA | 0 | NA   | 0  | NA |
| 0 | 0  | 0  | 0  | 0  | 3  | 2  | 0 | NA   | 0  | NA |
| 2 | 0  | 0  | 1  | 0  | NA | NA | 1 | NA   | NA | NA |
| 0 | 0  | 1  | 0  | 0  | 3  | 1  | 0 | NA   | 0  | NA |
| 0 | 0  | 1  | 1  | 0  | 2  | NA | 0 | NA   | NA | NA |
| 0 | 0  | 1  | 1  | 0  | 3  | 0  | 0 | NA   | 0  | NA |
| 0 | 0  | 1  | 0  | 0  | 3  | NA | 0 | NA   | NA | NA |
| 2 | 0  | 0  | 0  | 0  | 3  | NA | 0 | NA   | NA | NA |
| 1 | 0  | 1  | 1  | 0  | 2  | NA | 0 | NA   | NA | NA |
| 1 | 0  | 0  | 0  | 0  | 1  | NA | 0 | NA   | 0  | NA |
| 1 | 0  | 0  | 0  | 0  | 1  | NA | 0 | NA   | NA | NA |
| 0 | 0  | 0  | 1  | 0  | 2  | NA | 0 | NA   | NA | NA |
| 2 | 0  | 1  | 1  | 0  | 3  | 2  | 0 | NA   | 0  | NA |
| 0 | 0  | 1  | NA | 0  | 3  | 1  | 0 | NA   | 0  | NA |

|   |   |    |    |   |   |    |   |       |    |    |
|---|---|----|----|---|---|----|---|-------|----|----|
| 0 | 0 | 0  | 0  | 0 | 1 | NA | 0 | NA    | NA | NA |
| 2 | 0 | 0  | 0  | 0 | 2 | NA | 0 | NA    | NA | NA |
| 0 | 0 | 1  | 0  | 0 | 0 | NA | 0 | NA    | NA | NA |
| 1 | 0 | 0  | 1  | 0 | 2 | NA | 0 | NA    | NA | NA |
| 2 | 0 | 0  | 0  | 0 | 2 | NA | 0 | NA    | NA | NA |
| 0 | 0 | 1  | 0  | 0 | 3 | NA | 0 | NA    | NA | NA |
| 1 | 0 | 0  | 0  | 0 | 2 | NA | 0 | NA    | NA | NA |
| 0 | 0 | 1  | 1  | 0 | 3 | 0  | 0 | NA    | 0  | NA |
| 0 | 0 | 1  | 1  | 0 | 0 | 0  | 0 | 1033  | 1  | 2  |
| 0 | 1 | 0  | 0  | 0 | 2 | 0  | 1 | 495   | 1  | 2  |
| 0 | 0 | NA | 1  | 0 | 0 | 0  | 0 | 4862  | 1  | 4  |
| 0 | 0 | 0  | 0  | 0 | 1 | 0  | 0 | NA    | 0  | 1  |
| 0 | 0 | 0  | 1  | 0 | 0 | 0  | 1 | 3537  | 1  | 2  |
| 1 | 0 | 0  | 1  | 0 | 0 | 0  | 0 | 72    | 1  | 4  |
| 1 | 0 | 0  | 0  | 0 | 1 | 0  | 0 | 82    | 1  | 2  |
| 1 | 0 | 0  | 1  | 0 | 0 | 0  | 0 | NA    | 0  | 1  |
| 0 | 0 | 0  | 0  | 0 | 1 | 0  | 0 | NA    | 0  | 2  |
| 0 | 0 | 0  | 1  | 0 | 0 | 0  | 0 | 760   | 1  | 3  |
| 1 | 0 | 0  | 1  | 1 | 3 | 0  | 1 | 19    | -1 | 1  |
| 0 | 0 | 0  | 0  | 0 | 1 | 0  | 0 | NA    | 0  | 1  |
| 0 | 0 | 0  | 0  | 0 | 0 | 0  | 0 | 525   | 1  | 1  |
| 0 | 0 | 0  | 0  | 0 | 0 | 0  | 0 | 9810  | 1  | 3  |
| 0 | 0 | 0  | 0  | 0 | 0 | 0  | 0 | 348   | 1  | 3  |
| 0 | 0 | 0  | 0  | 0 | 1 | 0  | 0 | 13617 | 1  | 4  |
| 0 | 0 | 0  | 1  | 0 | 0 | 0  | 0 | 419   | 1  | 2  |
| 1 | 0 | 0  | 1  | 0 | 0 | 0  | 1 | 34    | -1 | 4  |
| 0 | 0 | 0  | 0  | 0 | 0 | 0  | 0 | 351   | 1  | 3  |
| 0 | 0 | 0  | 0  | 0 | 1 | NA | 0 | NA    | NA | NA |
| 0 | 0 | 0  | 0  | 0 | 0 | 0  | 0 | 455   | 1  | 4  |
| 0 | 0 | 0  | 0  | 0 | 0 | 0  | 0 | 25    | -1 | 4  |
| 0 | 0 | 1  | 0  | 0 | 1 | 0  | 0 | NA    | 0  | 2  |
| 0 | 0 | 1  | 1  | 1 | 3 | NA | 0 | NA    | NA | NA |
| 0 | 0 | 0  | 1  | 0 | 0 | NA | 0 | NA    | NA | NA |
| 0 | 0 | 0  | 0  | 0 | 0 | NA | 0 | NA    | NA | NA |
| 0 | 0 | 0  | 0  | 0 | 3 | NA | 0 | NA    | NA | NA |
| 1 | 0 | 0  | 0  | 1 | 2 | NA | 0 | NA    | NA | NA |
| 0 | 0 | 1  | 1  | 0 | 0 | NA | 0 | NA    | NA | NA |
| 0 | 0 | 0  | 0  | 1 | 0 | NA | 0 | NA    | NA | NA |
| 0 | 0 | 1  | 0  | 0 | 0 | NA | 0 | NA    | NA | NA |
| 1 | 0 | 1  | 1  | 0 | 1 | NA | 1 | NA    | NA | NA |
| 1 | 0 | 0  | 0  | 0 | 1 | NA | 0 | NA    | NA | NA |
| 0 | 0 | 0  | 0  | 0 | 2 | NA | 0 | NA    | NA | NA |
| 0 | 0 | 1  | 1  | 0 | 1 | NA | 0 | NA    | NA | NA |
| 0 | 0 | 1  | 1  | 0 | 1 | NA | 0 | NA    | NA | NA |
| 0 | 0 | 0  | 0  | 0 | 1 | NA | 0 | NA    | NA | NA |
| 1 | 0 | 0  | 0  | 1 | 0 | NA | 0 | NA    | NA | NA |
| 0 | 0 | 0  | 1  | 0 | 3 | NA | 0 | NA    | NA | NA |
| 0 | 0 | 0  | 0  | 0 | 0 | 0  | 0 | 1     | -1 | NA |
| 0 | 1 | 0  | 1  | 0 | 2 | 0  | 0 | 7     | -1 | NA |
| 0 | 0 | 0  | 1  | 0 | 0 | 0  | 0 | 30    | -1 | NA |
| 0 | 0 | 0  | 0  | 0 | 3 | 0  | 0 | NA    | 0  | NA |
| 0 | 0 | NA | 0  | 0 | 0 | 0  | 0 | NA    | 0  | NA |
| 0 | 0 | 0  | 0  | 0 | 0 | 0  | 0 | 5     | -1 | NA |
| 0 | 0 | 0  | 0  | 0 | 0 | 0  | 0 | 7     | -1 | NA |
| 0 | 0 | 1  | 1  | 0 | 0 | 0  | 0 | NA    | 0  | NA |
| 0 | 0 | 1  | 1  | 0 | 0 | 0  | 0 | NA    | 0  | NA |
| 0 | 0 | 0  | 1  | 0 | 0 | 0  | 1 | NA    | 0  | NA |
| 0 | 1 | 0  | 1  | 0 | 0 | 0  | 0 | 8     | -1 | NA |
| 0 | 1 | 0  | 1  | 0 | 0 | 0  | 0 | 8     | -1 | NA |
| 0 | 0 | 0  | 0  | 0 | 3 | 0  | 0 | 15    | -1 | NA |
| 0 | 0 | 0  | 0  | 0 | 1 | 0  | 1 | NA    | 0  | NA |
| 0 | 0 | 1  | 1  | 0 | 0 | 0  | 0 | 0     | -1 | NA |
| 1 | 0 | 0  | NA | 0 | 0 | 0  | 0 | 22    | -1 | NA |
| 0 | 0 | 0  | 0  | 0 | 0 | 0  | 0 | 6     | -1 | NA |
| 0 | 1 | 0  | 0  | 0 | 2 | 0  | 0 | 13    | -1 | NA |
| 0 | 0 | 0  | 0  | 0 | 1 | 0  | 0 | 28    | -1 | NA |
| 0 | 0 | 1  | 0  | 0 | 3 | 0  | 1 | 15    | -1 | NA |
| 0 | 0 | 0  | 0  | 0 | 0 | 0  | 0 | 7     | -1 | NA |
| 0 | 0 | 0  | 0  | 0 | 1 | NA | 0 | NA    | 0  | NA |
| 1 | 0 | 1  | 0  | 0 | 0 | 0  | 0 | NA    | 0  | NA |
| 0 | 0 | 0  | 0  | 0 | 3 | 0  | 0 | 11    | -1 | NA |
| 0 | 0 | 0  | 0  | 0 | 3 | 0  | 0 | 11    | -1 | NA |
| 0 | 0 | 0  | 0  | 0 | 1 | 0  | 0 | NA    | 0  | NA |
| 0 | 0 | 1  | 1  | 0 | 0 | NA | 0 | NA    | NA | NA |
| 0 | 0 | 1  | 1  | 0 | 1 | NA | 0 | NA    | NA | NA |
| 0 | 0 | 1  | 0  | 0 | 1 | NA | 0 | NA    | NA | NA |
| 0 | 0 | 0  | 1  | 0 | 0 | NA | 0 | NA    | NA | NA |
| 0 | 0 | 0  | 0  | 0 | 0 | NA | 0 | NA    | NA | NA |
| 0 | 0 | 1  | 0  | 0 | 0 | NA | 0 | NA    | NA | NA |
| 0 | 0 | 0  | 1  | 0 | 3 | NA | 0 | NA    | NA | NA |
| 0 | 1 | 1  | 1  | 0 | 1 | NA | 0 | NA    | NA | NA |
| 0 | 0 | 0  | 0  | 0 | 3 | NA | 0 | NA    | NA | NA |
| 0 | 0 | 0  | 0  | 1 | 1 | NA | 0 | NA    | NA | NA |
| 0 | 0 | 1  | 0  | 0 | 0 | 1  | 0 | NA    | 0  | NA |
| 0 | 0 | 0  | 0  | 1 | 1 | NA | 0 | NA    | NA | NA |
| 0 | 0 | 0  | 0  | 1 | 1 | NA | 0 | NA    | NA | NA |
| 0 | 0 | 0  | 0  | 1 | 0 | NA | 0 | NA    | NA | NA |
| 0 | 0 | 1  | 0  | 0 | 1 | 2  | 0 | NA    | 0  | NA |
| 0 | 0 | 1  | 1  | 0 | 0 | 2  | 0 | NA    | 0  | NA |
| 1 | 0 | 0  | 0  | 0 | 2 | NA | 0 | NA    | NA | NA |

|   |   |   |   |   |   |    |    |    |    |    |
|---|---|---|---|---|---|----|----|----|----|----|
| 0 | 0 | 1 | 1 | 0 | 3 | NA | NA | NA | NA | NA |
| 0 | 0 | 1 | 1 | 0 | 3 | NA | NA | NA | NA | NA |
| 0 | 0 | 0 | 1 | 0 | 2 | NA | NA | NA | NA | NA |
| 0 | 0 | 1 | 1 | 0 | 0 | NA | NA | NA | NA | NA |
| 0 | 0 | 0 | 0 | 0 | 0 | NA | NA | NA | NA | NA |
| 0 | 0 | 0 | 0 | 0 | 0 | NA | NA | NA | NA | NA |
| 0 | 0 | 0 | 0 | 0 | 0 | NA | NA | NA | NA | NA |
| 2 | 0 | 0 | 0 | 0 | 0 | NA | NA | NA | NA | NA |
| 2 | 0 | 0 | 0 | 0 | 0 | NA | NA | NA | NA | NA |
| 0 | 0 | 1 | 1 | 0 | 0 | NA | NA | NA | NA | NA |
| 0 | 0 | 1 | 1 | 0 | 0 | NA | NA | NA | NA | NA |
| 1 | 0 | 0 | 0 | 0 | 1 | NA | NA | NA | NA | NA |
| 1 | 0 | 0 | 0 | 0 | 1 | NA | NA | NA | NA | NA |
| 0 | 0 | 0 | 0 | 1 | 3 | NA | NA | NA | NA | NA |
| 0 | 0 | 0 | 0 | 0 | 3 | NA | NA | NA | NA | NA |
| 0 | 0 | 0 | 0 | 0 | 3 | NA | NA | NA | NA | NA |
| 0 | 0 | 0 | 0 | 0 | 3 | NA | NA | NA | NA | NA |
| 0 | 0 | 0 | 0 | 0 | 3 | NA | NA | NA | NA | NA |
| 0 | 0 | 1 | 1 | 0 | 2 | NA | NA | NA | NA | NA |
| 0 | 0 | 1 | 0 | 0 | 0 | NA | NA | NA | NA | NA |
| 0 | 0 | 1 | 0 | 0 | 0 | NA | NA | NA | NA | NA |
| 1 | 0 | 0 | 0 | 0 | 0 | NA | NA | NA | NA | NA |
| 1 | 0 | 0 | 0 | 0 | 0 | NA | NA | NA | NA | NA |
| 0 | 1 | 1 | 1 | 0 | 0 | NA | NA | NA | NA | NA |
| 0 | 1 | 1 | 1 | 0 | 0 | NA | NA | NA | NA | NA |
| 1 | 0 | 0 | 0 | 0 | 2 | NA | NA | NA | NA | NA |
| 1 | 0 | 0 | 0 | 0 | 2 | NA | NA | NA | NA | NA |
| 0 | 0 | 1 | 0 | 0 | 3 | NA | NA | NA | NA | NA |
| 0 | 0 | 1 | 0 | 0 | 3 | NA | NA | NA | NA | NA |
| 0 | 0 | 1 | 0 | 0 | 3 | NA | NA | NA | NA | NA |
| 0 | 0 | 1 | 1 | 0 | 3 | NA | NA | NA | NA | NA |
| 0 | 0 | 1 | 1 | 0 | 3 | NA | NA | NA | NA | NA |
| 0 | 0 | 1 | 1 | 0 | 0 | NA | NA | NA | NA | NA |
| 0 | 1 | 0 | 0 | 0 | 2 | NA | NA | NA | NA | NA |
| 0 | 1 | 0 | 0 | 0 | 2 | NA | NA | NA | NA | NA |
| 0 | 0 | 1 | 1 | 0 | 0 | NA | NA | NA | NA | NA |
| 0 | 0 | 0 | 1 | 0 | 0 | NA | NA | NA | NA | NA |
| 0 | 0 | 0 | 1 | 0 | 0 | NA | NA | NA | NA | NA |
| 1 | 0 | 0 | 0 | 0 | 1 | NA | NA | NA | NA | NA |
| 1 | 0 | 0 | 0 | 0 | 1 | NA | NA | NA | NA | NA |
| 1 | 0 | 0 | 1 | 1 | 3 | NA | NA | NA | NA | NA |
| 1 | 0 | 0 | 1 | 1 | 3 | NA | NA | NA | NA | NA |
| 1 | 0 | 0 | 1 | 1 | 3 | NA | NA | NA | NA | NA |
| 0 | 0 | 0 | 0 | 0 | 0 | NA | NA | NA | NA | NA |
| 0 | 0 | 0 | 0 | 0 | 0 | NA | NA | NA | NA | NA |
| 0 | 0 | 0 | 1 | 0 | 0 | NA | NA | NA | NA | NA |
| 0 | 0 | 0 | 1 | 0 | 0 | NA | NA | NA | NA | NA |
| 0 | 0 | 0 | 1 | 0 | 0 | NA | NA | NA | NA | NA |
| 1 | 0 | 0 | 0 | 1 | 0 | NA | NA | NA | NA | NA |

Supplementary Table S2

| Variable Description                                               | Variable Name    | QES Column            | Full Definition                                                                                                                                                                                                                                                                                                                                      | Categories                                                                                             |
|--------------------------------------------------------------------|------------------|-----------------------|------------------------------------------------------------------------------------------------------------------------------------------------------------------------------------------------------------------------------------------------------------------------------------------------------------------------------------------------------|--------------------------------------------------------------------------------------------------------|
| Alcohol consumption status                                         | alcohol_status   |                       | Ever drunk alcohol regularly, that is at least once per month for 6 months or more                                                                                                                                                                                                                                                                   | NA = Missing or Don't know<br>0=Never drinker<br>1=Ever drinker                                        |
| Alcohol consumption                                                | alc_dd           |                       | Drinks/day of total alcohol in lifetime.<br>Weighted average of the alcohol intakes at different ages, with weights equal to the total subject-specific time of investigation<br><br>Formula: $F/(age-20)$<br>$F = ( \text{mean}(\text{beer\_st1}, \text{beer\_s2}, \dots, \text{spirits\_st5}) * (\text{Min}(\text{age\_last}, \text{age}) - 20) )$ | <b>Continuous</b><br><b>NA = Missing or Don't know</b><br><b>0=Never drinker</b>                       |
| Have been diagnosed with diabetes                                  | alldiab          | G19A11, G19Alreland11 | Subjects report if they have ever been diagnosed with diabetes.                                                                                                                                                                                                                                                                                      | NA=Missing or Don't Know<br>0= No<br>1=Yes                                                             |
| Have been diagnosed with diabetes categorical by time of diagnosis | diabcat          | G19A11, G19B11, agec  | Subjects that report having been diagnosed with diabetes are categorized by being diagnosed more or less than 2 years before the time of recruitment in the study                                                                                                                                                                                    | NA=Missing or Don't Know<br>1 = less than 3years<br>2 = more or equal to 3 years                       |
| BMI at two years prior recruitment $\geq 30$                       | obese            | A7-1-1 and A61-1      | Subjects that have BMI $\geq 30$ two years before study recruitment                                                                                                                                                                                                                                                                                  | NA=Missing or Don't know<br>0 = BMI $< 30$<br>1= BMI $\geq 30$                                         |
| Type of pancreatitis                                               | panctype         | G20B11                | Subjects report if their type of pancreatitis if they have been diagnosed with it.<br><br><b>è Use this variable for analyses</b><br><br>*Pancreatitis cases forced all into the 'chronic' category*                                                                                                                                                 | NA=Missing or Don't know<br>0= No pancreatitis<br>1 = Acute<br>2 = Chronic                             |
| Type of pancreatitis                                               | Panctype_patient | G20B11                | Subjects report if their type of pancreatitis if they have been diagnosed with it. Variable exactly as reported by the patient                                                                                                                                                                                                                       | <b>NA=Missing or Don't know</b><br><b>0= No pancreatitis</b><br><b>1 = Acute</b><br><b>2 = Chronic</b> |
| Have had asthma                                                    | asthma           | G5-1-1                | Subjects that report ever having asthma.                                                                                                                                                                                                                                                                                                             | NA=Missing or Don't know<br>0= No<br>1=Yes                                                             |
| Have had nasal allergies (Rhinitis)                                | nasal            | G11-1-1               | Subjects that report having had nasal allergies including hay fever                                                                                                                                                                                                                                                                                  | NA=Missing or Don't know<br>0= No<br>1=Yes                                                             |
| Ever been diagnosed with heartburn                                 | allhburn         | G42A11, G42Alreland11 | Subjects report if they have ever been diagnosed with Heartburn.                                                                                                                                                                                                                                                                                     | NA=Missing or Don't know<br>0= No<br>1=Yes                                                             |
| Ever been diagnosed with acid regurgitation                        | allacid          | G42B11, G42Blreland11 | Subjects report if they have ever been diagnosed with Acid regurgitation                                                                                                                                                                                                                                                                             | NA=Missing or Don't know<br>0= No<br>1=Yes                                                             |
| Have been diagnosed with Rheumatoid arthritis                      | allrheum         | G2311, G23Ireland11   | Subjects report if they have ever been diagnosed with Rheumatoid arthritis                                                                                                                                                                                                                                                                           | NA=Missing or Don't know<br>0= No<br>1=Yes                                                             |
| Ever been diagnosed with High blood pressure                       | allhbp           | G4011, G40Ireland11   | Subjects report if they have ever been diagnosed with High blood pressure                                                                                                                                                                                                                                                                            | NA=Missing or Don't know<br>0= No<br>1=Yes                                                             |
| Ever been diagnosed with high blood pressure                       | cholesterol      | G4311                 | Subjects report if they have ever been diagnosed with High cholesterol                                                                                                                                                                                                                                                                               | NA=Missing or Don't know<br>0= No<br>1=Yes                                                             |
| Have had periodontitis                                             | periodontitis    | J7-1-1                | Subjects that report, excluding the last two years, to been told by a dentist that they have                                                                                                                                                                                                                                                         | NA=Missing or Don't know<br>1=Yes                                                                      |

|                                             |                  |                                                         |                                                                                                                                                                                                                                                                                                                                                                                             |                                                                                                 |
|---------------------------------------------|------------------|---------------------------------------------------------|---------------------------------------------------------------------------------------------------------------------------------------------------------------------------------------------------------------------------------------------------------------------------------------------------------------------------------------------------------------------------------------------|-------------------------------------------------------------------------------------------------|
|                                             |                  |                                                         | periodontitis                                                                                                                                                                                                                                                                                                                                                                               | 0 = No                                                                                          |
| Have had receding gums                      | recession        | J6-1-1                                                  | Subjects report having receding gums                                                                                                                                                                                                                                                                                                                                                        | NA=Missing or Don't know<br>1=Yes<br>0 = No                                                     |
| PDAC in a relative                          | FHPDAC           | All K25 variables and all cancer location variables K26 | History of PDAC (pancreatic ductal adenocarcinoma) in a relative.<br>Subjects reported if any first degree relative had ever been diagnosed with PDAC.<br>"Yes" was considered if any K25* variables was reported as yes and if location (any k26* variable) was reported to be PDAC.<br>Diagnoses of other cancers, other than PDAC, in first degree relatives was considered as NO FHPDAC | NA=Missing or Don't know<br>0=no FHPDAC<br>1=yes FHPDAC                                         |
| Diabetes control with diet                  | diabdiet         | cdiabtmodifdieta                                        | Subjects reported if their diabetes is controlled with dietary changes                                                                                                                                                                                                                                                                                                                      | NA= Missing or Don't know<br>0= Answered No to alldiab<br>1 = Yes<br>2 = No                     |
| Diabetes control with insulin               | diabin           | diabetinsulina                                          | Subjects reported if their diabetes is controlled with insulin pump or injections                                                                                                                                                                                                                                                                                                           | NA= Missing or Don't know<br>0= Answered No to alldiab<br>1 = Yes<br>2 = No                     |
| Diabetes control with medication            | diabmed          | diabetmedoral                                           | Subjects reported if their diabetes is controlled with oral medication                                                                                                                                                                                                                                                                                                                      | NA= Missing or Don't know<br>0= Answered No to alldiab<br>1 = Yes<br>2 = No                     |
| Metformin                                   | metformin.ever   |                                                         | Subjects report if ever taking metformin regularly, that is 3 months or more during the last five years                                                                                                                                                                                                                                                                                     | NA= Don't know<br>0 =No diabetes & no oral medication<br>1= Metformin use<br>2=No metformin use |
| Any acid regurgitation/Heartburn medication | abmedication     | tratamproregur                                          | The subject reports at least one medication of this class ( <u>regardless of their report on the disease status</u> )                                                                                                                                                                                                                                                                       | NA= Missing or Don't know<br>0= No medication<br>1= Medication                                  |
| Cholesterol medication                      | cholmedication   | g37ttocolestalto                                        | The subject reports at least one medication of this class ( <u>regardless of their report on the disease status</u> )                                                                                                                                                                                                                                                                       | NA= Missing or Don't know<br>0= No medication<br>1= Medication                                  |
| Aspirin/Paracetamol medication              | asparmed         | tomadoantiinflam                                        | Subjects reported if they ever took aspirin or paracetamol or other anti-inflammatory medication regularly                                                                                                                                                                                                                                                                                  | NA = Don't know<br>0 = No<br>1 = Yes                                                            |
| salicylic                                   | salicylic.ever   |                                                         | Subjects report if they ever took aspirin (irrespective of reportin other anti-inflammatory medication)                                                                                                                                                                                                                                                                                     | NA = Don't know<br>0 = No<br>1 = Yes                                                            |
| paracetamol                                 | paracetamol.ever |                                                         | Subjects report if they ever took paracetamol (irrespective of reportin other anti-inflammatory medication)                                                                                                                                                                                                                                                                                 | NA = Don't know<br>0 = No<br>1 = Yes                                                            |
| Corticosteroids medication                  | cortmed          | H3-1-1tocorticoides                                     | Subjects reported if they ever took corticoids regularly                                                                                                                                                                                                                                                                                                                                    | NA = Missing or Don't know<br>0 = No<br>1 = Yes                                                 |
| NSAIDs medication                           | nsaidmed         | H2-1-1                                                  | Subjects reported if they ever took nsaid regularly<br><br>*Answer from Sweden was based on variable H2B_1EU, if nsaid reported then a number 1 was given for this variable                                                                                                                                                                                                                 | NA = missing or Don't know<br>0 = No<br>1 = Yes                                                 |
| Antibiotics                                 | antibiotic       | h3attoantibiot                                          | Subjects reported if they ever took antibiotics during the past five years                                                                                                                                                                                                                                                                                                                  | NA = Don't know<br>0 = No<br>1 = Yes                                                            |
| Pro/prebiotics                              | probiot          | h4attoprobiotprebiot                                    | Subjects reported if they ever took <u>prebiotics or probiotics</u> regularly during the past five years                                                                                                                                                                                                                                                                                    | NA = Don't know<br>0 = No<br>1 = Yes                                                            |

Supplementary Table S3: DE Cohort Details

| sample_alias   | instrument_model    | replicate | insert_size | read_length | read_count | ronment_mat | timepoint | gender | age_years | ollection_datct_disease_s |
|----------------|---------------------|-----------|-------------|-------------|------------|-------------|-----------|--------|-----------|---------------------------|
| MBJT10257157ST | Illumina HiSeq 4000 | 0         | 300         | 150         | 47393312   | [ENVO:0000: | 0         | female | 65        | 2014-2020 PC              |
| MBJT13029530ST | Illumina HiSeq 4000 | 0         | 300         | 150         | 44500100   | [ENVO:0000: | 0         | male   | 34        | 2014-2020 CTR             |
| MBJT13966914ST | Illumina HiSeq 4000 | 0         | 300         | 150         | 55422086   | [ENVO:0000: | 0         | male   | 66        | 2014-2020 PC              |
| MBJT14741058ST | Illumina HiSeq 4000 | 0         | 300         | 150         | 54925804   | [ENVO:0000: | 0         | male   | 29        | 2014-2020 CTR             |
| MBJT18793872ST | Illumina HiSeq 4000 | 0         | 300         | 150         | 48908442   | [ENVO:0000: | 0         | female | 66        | 2014-2020 PC              |
| MBJT19172978ST | Illumina HiSeq 4000 | 0         | 300         | 150         | 36491564   | [ENVO:0000: | 0         | female | 54        | 2014-2020 CTR             |
| MBJT19739988ST | Illumina HiSeq 4000 | 0         | 300         | 150         | 43913396   | [ENVO:0000: | 0         | male   | 59        | 2014-2020 PC              |
| MBJT22022613ST | Illumina HiSeq 4000 | 0         | 300         | 150         | 37301894   | [ENVO:0000: | 0         | male   | 61        | 2014-2020 CTR             |
| MBJT22320456ST | Illumina HiSeq 4000 | 0         | 300         | 150         | 39863688   | [ENVO:0000: | 0         | male   | 74        | 2014-2020 PC              |
| MBJT23133014ST | Illumina HiSeq 4000 | 0         | 300         | 150         | 44285414   | [ENVO:0000: | 0         | female | 40        | 2014-2020 CTR             |
| MBJT24075712ST | Illumina HiSeq 4000 | 0         | 300         | 150         | 38908806   | [ENVO:0000: | 0         | male   | 65        | 2014-2020 PC              |
| MBJT24417068ST | Illumina HiSeq 4000 | 0         | 300         | 150         | 46462326   | [ENVO:0000: | 0         | male   | 49        | 2014-2020 CTR             |
| MBJT24770375ST | Illumina HiSeq 4000 | 0         | 300         | 150         | 41886800   | [ENVO:0000: | 0         | female | 73        | 2014-2020 PC              |
| MBJT25397146ST | Illumina HiSeq 4000 | 0         | 300         | 150         | 38837880   | [ENVO:0000: | 0         | female | 68        | 2014-2020 CTR             |
| MBJT26681707ST | Illumina HiSeq 4000 | 0         | 300         | 150         | 39728784   | [ENVO:0000: | 0         | female | 57        | 2014-2020 PC              |
| MBJT28436807ST | Illumina HiSeq 4000 | 0         | 300         | 150         | 43156950   | [ENVO:0000: | 0         | male   | 63        | 2014-2020 PC              |
| MBJT28723736ST | Illumina HiSeq 4000 | 0         | 300         | 150         | 34666406   | [ENVO:0000: | 0         | female | 79        | 2014-2020 PC              |
| MBJT30331144ST | Illumina HiSeq 4000 | 0         | 300         | 150         | 31449568   | [ENVO:0000: | 0         | female | 76        | 2014-2020 PC              |
| MBJT32951253ST | Illumina HiSeq 4000 | 0         | 300         | 150         | 42555236   | [ENVO:0000: | 0         | female | 78        | 2014-2020 PC              |
| MBJT34036667ST | Illumina HiSeq 4000 | 0         | 300         | 150         | 41733736   | [ENVO:0000: | 0         | male   | 55        | 2014-2020 CTR             |
| MBJT34220088ST | Illumina HiSeq 4000 | 0         | 300         | 150         | 48977086   | [ENVO:0000: | 0         | male   | 80        | 2014-2020 PC              |
| MBJT35001732ST | Illumina HiSeq 4000 | 0         | 300         | 150         | 45479874   | [ENVO:0000: | 0         | female | 40        | 2014-2020 CTR             |
| MBJT35016775ST | Illumina HiSeq 4000 | 0         | 300         | 150         | 47763580   | [ENVO:0000: | 0         | female | 81        | 2014-2020 PC              |
| MBJT35058600ST | Illumina HiSeq 4000 | 0         | 300         | 150         | 51795444   | [ENVO:0000: | 0         | female | 71        | 2014-2020 PC              |
| MBJT40306752ST | Illumina HiSeq 4000 | 0         | 300         | 150         | 46477424   | [ENVO:0000: | 0         | female | 24        | 2014-2020 CTR             |
| MBJT40435704ST | Illumina HiSeq 4000 | 0         | 300         | 150         | 45919556   | [ENVO:0000: | 0         | male   | 63        | 2014-2020 PC              |
| MBJT40701160ST | Illumina HiSeq 4000 | 0         | 300         | 150         | 50045710   | [ENVO:0000: | 0         | female | 26        | 2014-2020 CTR             |
| MBJT40707177ST | Illumina HiSeq 4000 | 0         | 300         | 150         | 40242120   | [ENVO:0000: | 0         | female | 82        | 2014-2020 PC              |
| MBJT41036209ST | Illumina HiSeq 4000 | 0         | 300         | 150         | 42245120   | [ENVO:0000: | 0         | male   | 67        | 2014-2020 PC              |
| MBJT41854002ST | Illumina HiSeq 4000 | 0         | 300         | 150         | 40271702   | [ENVO:0000: | 0         | male   | 46        | 2014-2020 CTR             |
| MBJT42733650ST | Illumina HiSeq 4000 | 0         | 300         | 150         | 35444906   | [ENVO:0000: | 0         | male   | 80        | 2014-2020 PC              |
| MBJT42917972ST | Illumina HiSeq 4000 | 0         | 300         | 150         | 40122088   | [ENVO:0000: | 0         | female | 72        | 2014-2020 CTR             |
| MBJT44556531ST | Illumina HiSeq 4000 | 0         | 300         | 150         | 53434320   | [ENVO:0000: | 0         | female | 50        | 2014-2020 PC              |
| MBJT46290466ST | Illumina HiSeq 4000 | 0         | 300         | 150         | 37640290   | [ENVO:0000: | 0         | female | 49        | 2014-2020 CTR             |
| MBJT47281689ST | Illumina HiSeq 4000 | 0         | 300         | 150         | 55830262   | [ENVO:0000: | 0         | female | 76        | 2014-2020 PC              |
| MBJT47376024ST | Illumina HiSeq 4000 | 0         | 300         | 150         | 38754652   | [ENVO:0000: | 0         | female | 66        | 2014-2020 PC              |
| MBJT47759212ST | Illumina HiSeq 4000 | 0         | 300         | 150         | 31813116   | [ENVO:0000: | 0         | male   | 70        | 2014-2020 PC              |
| MBJT47974019ST | Illumina HiSeq 4000 | 0         | 300         | 150         | 38234074   | [ENVO:0000: | 0         | female | 81        | 2014-2020 PC              |
| MBJT54042978ST | Illumina HiSeq 4000 | 0         | 300         | 150         | 51374756   | [ENVO:0000: | 0         | female | 50        | 2014-2020 CTR             |
| MBJT54598736ST | Illumina HiSeq 4000 | 0         | 300         | 150         | 46583366   | [ENVO:0000: | 0         | male   | 28        | 2014-2020 CTR             |
| MBJT54773511ST | Illumina HiSeq 4000 | 0         | 300         | 150         | 45819402   | [ENVO:0000: | 0         | male   | 31        | 2014-2020 CTR             |
| MBJT55041082ST | Illumina HiSeq 4000 | 0         | 300         | 150         | 25828972   | [ENVO:0000: | 0         | male   | 80        | 2014-2020 PC              |
| MBJT55763017ST | Illumina HiSeq 4000 | 0         | 300         | 150         | 37164202   | [ENVO:0000: | 0         | female | 73        | 2014-2020 PC              |
| MBJT56486370ST | Illumina HiSeq 4000 | 0         | 300         | 150         | 60275548   | [ENVO:0000: | 0         | male   | 87        | 2014-2020 CTR             |
| MBJT57869938ST | Illumina HiSeq 4000 | 0         | 300         | 150         | 36431696   | [ENVO:0000: | 0         | female | 61        | 2014-2020 PC              |
| MBJT58818096ST | Illumina HiSeq 4000 | 0         | 300         | 150         | 42617446   | [ENVO:0000: | 0         | female | 69        | 2014-2020 PC              |
| MBJT59111766ST | Illumina HiSeq 4000 | 0         | 300         | 150         | 39629386   | [ENVO:0000: | 0         | female | 55        | 2014-2020 CTR             |
| MBJT61614909ST | Illumina HiSeq 4000 | 0         | 300         | 150         | 32278494   | [ENVO:0000: | 0         | female | 56        | 2014-2020 PC              |
| MBJT61989978ST | Illumina HiSeq 4000 | 0         | 300         | 150         | 44899094   | [ENVO:0000: | 0         | male   | 67        | 2014-2020 CTR             |
| MBJT63497322ST | Illumina HiSeq 4000 | 0         | 300         | 150         | 41550048   | [ENVO:0000: | 0         | female | 65        | 2014-2020 PC              |
| MBJT64178099ST | Illumina HiSeq 4000 | 0         | 300         | 150         | 45792268   | [ENVO:0000: | 0         | female | 28        | 2014-2020 CTR             |
| MBJT64323881ST | Illumina HiSeq 4000 | 0         | 300         | 150         | 51879638   | [ENVO:0000: | 0         | female | 87        | 2014-2020 PC              |
| MBJT65314632ST | Illumina HiSeq 4000 | 0         | 300         | 150         | 40100360   | [ENVO:0000: | 0         | male   | 77        | 2014-2020 PC              |
| MBJT66677231ST | Illumina HiSeq 4000 | 0         | 300         | 150         | 38271172   | [ENVO:0000: | 0         | male   | 59        | 2014-2020 CTR             |
| MBJT69789353ST | Illumina HiSeq 4000 | 0         | 300         | 150         | 37463630   | [ENVO:0000: | 0         | female | 79        | 2014-2020 PC              |
| MBJT71206045ST | Illumina HiSeq 4000 | 0         | 300         | 150         | 37446348   | [ENVO:0000: | 0         | male   | 64        | 2014-2020 PC              |
| MBJT73212715ST | Illumina HiSeq 4000 | 0         | 300         | 150         | 29746146   | [ENVO:0000: | 0         | male   | 81        | 2014-2020 PC              |
| MBJT73621698ST | Illumina HiSeq 4000 | 0         | 300         | 150         | 46013560   | [ENVO:0000: | 0         | male   | 22        | 2014-2020 CTR             |
| MBJT75354344ST | Illumina HiSeq 4000 | 0         | 300         | 150         | 42836122   | [ENVO:0000: | 0         | male   | 84        | 2014-2020 PC              |
| MBJT75856433ST | Illumina HiSeq 4000 | 0         | 300         | 150         | 38763576   | [ENVO:0000: | 0         | female | 60        | 2014-2020 PC              |
| MBJT76001019ST | Illumina HiSeq 4000 | 0         | 300         | 150         | 41432142   | [ENVO:0000: | 0         | female | 36        | 2014-2020 CTR             |
| MBJT77767153ST | Illumina HiSeq 4000 | 0         | 300         | 150         | 51551804   | [ENVO:0000: | 0         | female | 70        | 2014-2020 CTR             |
| MBJT79123647ST | Illumina HiSeq 4000 | 0         | 300         | 150         | 40277574   | [ENVO:0000: | 0         | female | 72        | 2014-2020 PC              |
| MBJT82870648ST | Illumina HiSeq 4000 | 0         | 300         | 150         | 47315674   | [ENVO:0000: | 0         | male   | 30        | 2014-2020 CTR             |
| MBJT83133832ST | Illumina HiSeq 4000 | 0         | 300         | 150         | 40995200   | [ENVO:0000: | 0         | male   | 67        | 2014-2020 PC              |
| MBJT83294902ST | Illumina HiSeq 4000 | 0         | 300         | 150         | 37680998   | [ENVO:0000: | 0         | male   | 64        | 2014-2020 CTR             |
| MBJT85450199ST | Illumina HiSeq 4000 | 0         | 300         | 150         | 47792460   | [ENVO:0000: | 0         | male   | 76        | 2014-2020 PC              |
| MBJT85948313ST | Illumina HiSeq 4000 | 0         | 300         | 150         | 44611384   | [ENVO:0000: | 0         | male   | 49        | 2014-2020 CTR             |
| MBJT87587928ST | Illumina HiSeq 4000 | 0         | 300         | 150         | 43175984   | [ENVO:0000: | 0         | female | 62        | 2014-2020 CTR             |
| MBJT89319187ST | Illumina HiSeq 4000 | 0         | 300         | 150         | 43302384   | [ENVO:0000: | 0         | female | 40        | 2014-2020 PC              |
| MBJT90536787ST | Illumina HiSeq 4000 | 0         | 300         | 150         | 44711476   | [ENVO:0000: | 0         | female | 64        | 2014-2020 CTR             |
| MBJT92561737ST | Illumina HiSeq 4000 | 0         | 300         | 150         | 40739728   | [ENVO:0000: | 0         | female | 32        | 2014-2020 CTR             |
| MBJT92636570ST | Illumina HiSeq 4000 | 0         | 300         | 150         | 36248620   | [ENVO:0000: | 0         | male   | 57        | 2014-2020 PC              |
| MBJT93071877ST | Illumina HiSeq 4000 | 0         | 300         | 150         | 45583612   | [ENVO:0000: | 0         | female | 56        | 2014-2020 CTR             |
| MBJT94530819ST | Illumina HiSeq 4000 | 0         | 300         | 150         | 44454590   | [ENVO:0000: | 0         | female | 84        | 2014-2020 PC              |
| MBJT97792954ST | Illumina HiSeq 4000 | 0         | 300         | 150         | 42824760   | [ENVO:0000: | 0         | male   | 68        | 2014-2020 PC              |

| bmi   | smoker     | medication | stage | stage_detail | metastasis (he) | Treatment | iy_of_operati | erapy_after_G | of_last_follo | date_of_follo | Ca_19_9 |
|-------|------------|------------|-------|--------------|-----------------|-----------|---------------|---------------|---------------|---------------|---------|
| 27    | smoker     | NA         | 2     | 2b           | 0               | 1         | 27.02.20      | 1             | 0             | May 20        | 1702    |
| NA    | NA         | no         | NA    | NA           | NA              | NA        | NA            | NA            | NA            | NA            | NA      |
| 23,8  | non-smoker | NA         | 2     | 2b           | 0               | 1         | 21.02.20      | 1             | 0             | 02.06.20      | 2       |
| NA    | NA         | no         | NA    | NA           | NA              | NA        | NA            | NA            | NA            | NA            | NA      |
| 29,7  | non-smoker | NA         | 2     | 2a           | 0               | 4         | 31.01.20      | 3             | 0             | 03.06.20      | 1172    |
| NA    | NA         | L-Thyrox   | NA    | NA           | NA              | NA        | NA            | NA            | NA            | NA            | NA      |
| 21,47 | non-smoker | NA         | 4     | 4            | 0               | 6         | NA            | 3             | NA            | NA            | 1066    |
| 27,78 | smoker     | NA         | NA    | NA           | 0               | 1         | 01.04.19      | NA            | NA            | NA            | 1575    |
| 26,01 | non-smoker | NA         | 1     | 1b           | 0               | 1         | 08.01.19      | 2             | 0             | 19.06.20      | 17081   |
| NA    | NA         | no         | NA    | NA           | NA              | NA        | NA            | NA            | NA            | NA            | NA      |
| 29,54 | smoker     | NA         | 2     | 2b           | 0               | 1         | 04.07.19      | 2             | 0             | 06.03.20      | 2       |
| NA    | NA         | no         | NA    | NA           | NA              | NA        | NA            | NA            | NA            | NA            | NA      |
| 28,2  | smoker     | NA         | 4     | 4            | NA              | 8         | NA            | 0             | 0             | 16.09.20      | 4       |
| 20,2  | non-smoker | NA         | NA    | NA           | 0               | 7         | 09.07.19      | 2             | 0             | 08.05.20      | 1412    |
| 39,68 | smoker     | NA         | 3     | 3            | 0               | 4         | 08.01.19      | 3             | 1             | 08.11.19      | 1000    |
| 30,37 | smoker     | NA         | 3     | 3            | 0               | 2         | 26.01.19      | 2             | 0             | 15.06.20      | 71091   |
| 22,1  | non-smoker | NA         | 4     | 4            | 0               | 1         | 04.11.19      | 1             | 0             | 10.08.20      | 5097    |
| 32,8  | non-smoker | NA         | 4     | 4            | 0               | 1         | 10.02.20      | 0             | 0             | 23.04.20      | 2183    |
| 22,68 | non-smoker | NA         | 4     | 4            | 1               | 4         | 06.05.19      | 4             | 1             | 17.06.20      | 2       |
| NA    | NA         | no         | NA    | NA           | NA              | NA        | NA            | NA            | NA            | NA            | NA      |
| 32,3  | non-smoker | NA         | 2     | 2a           | 0               | 1         | 20.08.19      | 2             | 0             | 14.07.20      | 164583  |
| NA    | NA         | no         | NA    | NA           | NA              | NA        | NA            | NA            | NA            | NA            | NA      |
| 19,7  | smoker     | NA         | 3     | 3            | 0               | 1         | 03.03.20      | 1             | 0             | 30.03.20      | 2346    |
| 29,76 | smoker     | NA         | 4     | 4            | 1               | 4         | 04.02.19      | 3             | 1             | 17.03.20      | 3447    |
| NA    | NA         | no         | NA    | NA           | NA              | NA        | NA            | NA            | NA            | NA            | NA      |
| 27,1  | non-smoker | NA         | 2     | 2b           | 1               | 3         | NA            | 2, 3          | 1             | 04.05.20      | 379     |
| NA    | NA         | no         | NA    | NA           | NA              | NA        | NA            | NA            | NA            | NA            | NA      |
| 24,22 | smoker     | NA         | 4     | 4            | 0               | 8         | NA            | NA            | 0             | 16.09.20      | 138     |
| 23,26 | non-smoker | NA         | 4     | 4            | 0               | 1         | 30.07.19      | 0             | 0             | 10.09.20      | 906     |
| NA    | smoker     | no         | NA    | NA           | NA              | NA        | NA            | NA            | NA            | NA            | NA      |
| 26,8  | non-smoker | NA         | 2     | 2b           | 0               | 3         | 16.04.19      | 0             | 1             | 13.07.19      | 160969  |
| 31,24 | smoker     | NA         | NA    | NA           | 0               | 1         | 17.04.19      | NA            | NA            | NA            | 834     |
| 18,73 | non-smoker | NA         | 3     | 3            | 0               | 1, 7      | 30.09.19      | 5             | 0             | unknown       | 2       |
| NA    | NA         | L-Thyrox   | NA    | NA           | NA              | NA        | NA            | NA            | NA            | NA            | NA      |
| 22,7  | non-smoker | NA         | 3     | 3            | 0               | 2         | 04.02.20      | 2             | 0             | 04.06.20      | 6021    |
| 22,39 | non-smoker | NA         | 4     | 4            | 0               | 5         | 03.06.19      | 0             | 1             | 03.07.19      | 118805  |
| 27,13 | non-smoker | NA         | 1     | 1a           | 0               | 1, 3      | 1.2016-01.07. | 0             | 0             | 19.07.20      | 4       |
| 19,38 | smoker     | NA         | 3     | 3            | NA              | 1         | 23.01.20      | 3             | NA            | 16.09.20      | 985     |
| 28,9  | non-smoker | NA         | NA    | NA           | 0               | 4         | 14.11.19      | NA            | NA            | NA            | 76814   |
| NA    | NA         | no         | NA    | NA           | NA              | NA        | NA            | NA            | NA            | NA            | NA      |
| NA    | NA         | no         | NA    | NA           | NA              | NA        | NA            | NA            | NA            | NA            | NA      |
| 33,03 | non-smoker | NA         | 2     | 2a           | 0               | 3         | 02.08.19      | 2             | 1             | Jan 20        | 611609  |
| 25,64 | non-smoker | NA         | 4     | 4            | 1               | 4         | 30.01.19      | 3             | 1             | 09.04.19      | 42      |
| 21,5  | non-smoker | NA         | NA    | NA           | 1               | 2         | 18.02.20      | 2             | 0             | 11.09.20      | 239     |
| 32,87 | non-smoker | NA         | 2     | 2a           | 0               | 1         | 12.04.19      | 2             | 0             | 20.05.20      | 19635   |
| 25,35 | non-smoker | NA         | 3     | 3            | 0               | 1         | 14.02.19      | 2             | 1             | 24.01.20      | 130723  |
| NA    | NA         | no         | NA    | NA           | NA              | NA        | NA            | NA            | NA            | NA            | NA      |
| 23,92 | smoker     | NA         | 2     | 2b           | 0               | 1         | 20.03.19      | 2             | 0             | 08.06.20      | 27812   |
| 27,47 | non-smoker | NA         | NA    | NA           | 0               | 1         | 13.02.19      | NA            | NA            | NA            | 16658   |
| 30,4  | smoker     | NA         | 1     | 1b           | 0               | 3         | 10.07.19      | NA            | NA            | NA            | 222     |
| NA    | NA         | no         | NA    | NA           | NA              | NA        | NA            | NA            | NA            | NA            | NA      |
| 24,14 | non-smoker | NA         | 2     | 2b           | 0               | 1         | 29.01.19      | 0             | 1             | 30.01.19      | 7009    |
| 28,73 | non-smoker | NA         | 2     | 2a           | 0               | 2         | 24.01.19      | 0             | 1             | 29.03.19      | 7212    |
| NA    | NA         | no         | NA    | NA           | NA              | NA        | NA            | NA            | NA            | NA            | NA      |
| 27,8  | non-smoker | NA         | 4     | 4            | 0               | 1         | 20.12.19      | 2             | 0             | 06.08.20      | 87632   |
| NA    | smoker     | NA         | NA    | NA           | 0               | NA        | NA            | 4             | NA            | NA            | 12779   |
| 26,9  | non-smoker | NA         | 3     | 3            | 0               | 3         | 20.02.20      | NA            | NA            | NA            | 3464    |
| NA    | NA         | no         | NA    | NA           | NA              | NA        | NA            | NA            | NA            | NA            | NA      |
| 28,04 | non-smoker | NA         | 1     | 1b           | NA              | 8         | NA            | 0             | 0             | 16.09.20      | 379     |
| 25,9  | non-smoker | NA         | 4     | 4            | 1               | 4         | 16.01.19      | 0             | 1             | 07.03.19      | 978     |
| NA    | NA         | no         | NA    | NA           | NA              | NA        | NA            | NA            | NA            | NA            | NA      |
| 25,83 | non-smoker | NA         | NA    | NA           | 0               | 2         | 13.03.19      | NA            | NA            | NA            | 1865    |
| 29,76 | non-smoker | NA         | 3     | 3            | 0               | 3         | 02.05.19      | 2             | 0             | 12.05.20      | 2498    |
| NA    | NA         | no         | NA    | NA           | NA              | NA        | NA            | NA            | NA            | NA            | NA      |
| 22,58 | non-smoker | NA         | 3     | 3            | 1               | 7         | 01.10.14      | 2             | 0             | 16.09.20      | 451     |
| NA    | NA         | no         | NA    | NA           | NA              | NA        | NA            | NA            | NA            | NA            | NA      |
| 24,61 | non-smoker | NA         | 3     | 3            | 0               | 3         | 18.07.19      | NA            | NA            | NA            | 55435   |
| NA    | NA         | no         | NA    | NA           | NA              | NA        | NA            | NA            | NA            | NA            | NA      |
| 26,29 | non-smoker | NA         | NA    | NA           | 0               | 6         | NA            | NA            | 0             | 18.03.20      | 380838  |
| 24,22 | smoker     | NA         | 3     | 3            | 0               | 2         | 21.02.19      | 2             | 0             | 04.05.20      | 140631  |
| NA    | NA         | no         | NA    | NA           | NA              | NA        | NA            | NA            | NA            | NA            | NA      |
| NA    | NA         | no         | NA    | NA           | NA              | NA        | NA            | NA            | NA            | NA            | NA      |
| 22,9  | non-smoker | NA         | 3     | 3            | 0               | 1         | 19.12.19      | 2             | 0             | Aug 20        | 1146    |
| NA    | NA         | L-Thyrox   | NA    | NA           | NA              | NA        | NA            | NA            | NA            | NA            | NA      |
| 19,92 | non-smoker | NA         | 3     | 3            | 1               | 1         | 06.09.18      | 2             | 1             | 21.08.19      | NA      |
| 23,84 | non-smoker | NA         | 2     | 2a           | NA              | 8         | NA            | 3             | 1             | .04.2020 and  | 142     |



| alcohol | alcohol_        | amoumedication.1 | antibiotics <28 | PPI | recent_medicities | other_tbrbidities | dial | coded_ca19 | italological  | stai                       | amplng_time         |
|---------|-----------------|------------------|-----------------|-----|-------------------|-------------------|------|------------|---------------|----------------------------|---------------------|
| 1       | 3-4 per week    | 1                | 0               | 1   | NA                | 1                 | 0    | 1          | :N1L0V0Pn1    | Gay before operation       |                     |
| NA      | NA              | NA               | NA              | NA  | NA                | NA                | NA   | 0          | NA            | NA                         |                     |
| 0       | NA              | 1                | 0               | 1   | NA                | 1                 | 0    | -1         | N0L0V0Pn1     | Gay before operation       |                     |
| NA      | NA              | NA               | NA              | NA  | NA                | NA                | NA   | 0          | NA            | NA                         |                     |
| 1       | 1 per week      | 1                | 0               | 1   | NA                | 1                 | 0    | 1          | N0L0V0Pn1     | Gay before operation       |                     |
| NA      | NA              | NA               | NA              | NA  | NA                | NA                | NA   | 0          | NA            | NA                         |                     |
| 0       | -               | 1                | 0               | 0   | 7                 | 2                 | 0    | 1          | IV            | single sample              |                     |
| 1       | daily           | 1                | 0               | 1   | NA                | 1                 | 0    | -1         | NA            | ay before operation        |                     |
| 1       | ex abus         | 1                | 1               | 0   | NA                | 1                 | 1    | 1          | :N0L0V0Pn1    | G3ay before operation      |                     |
| NA      | NA              | NA               | NA              | NA  | NA                | NA                | NA   | 0          | NA            | NA                         |                     |
| 0       | NA              | 1                | 0               | 0   | NA                | 1                 | 1    | -1         | .0V0Pn1       | G3R3ay before operation    |                     |
| NA      | NA              | NA               | NA              | NA  | NA                | NA                | NA   | 0          | NA            | NA                         |                     |
| 0       | -               | 1                | 1               | 1   | 1, 3, 4, 5, 7     | 1, 4              | 0    | -1         | IV            | single sample              |                     |
| 1       | 3-4 per week    | 1                | 0               | 0   | NA                | 1                 | 0    | 1          | NA            | ay before operation        |                     |
| 0       | -               | 1                | 0               | 1   | 2, 3, 4, 5, 7     | 1                 | 0    | 1          | III           | single sample              |                     |
| 1       | daily           | 1                | 0               | 0   | NA                | 0                 | 1    | 1          | N2L0V0Pn1     | Gay before operation       |                     |
| 1       | 1-2 per week    | 1                | 1               | 1   | NA                | 1                 | 0    | 1          | NA            | ay before operation        |                     |
| 0       | NA              | 1                | 0               | 1   | NA                | 1                 | 0    | -1         | I1(hep)       | L0V0Pn1                    | ay before operation |
| 1       | 1-2 per week    | 1                | 0               | 0   | NA                | 3                 | 0    | -1         | NA            | ay before operation        |                     |
| NA      | NA              | NA               | NA              | NA  | NA                | NA                | NA   | 0          | NA            | NA                         |                     |
| 0       | NA              | 1                | 1               | 1   | NA                | 1                 | 0    | 1          | 3G2; pT3b     | N0Lay before operation     |                     |
| NA      | NA              | NA               | NA              | NA  | NA                | NA                | NA   | 0          | NA            | NA                         |                     |
| 1       | 1 per week      | 1                | 0               | 0   | NA                | 1                 | 0    | 1          | N2L0V1Pn1     | Gay before operation       |                     |
| 0       | NA              | 1                | 1               | 1   | NA                | 2                 | 0    | -1         | NA            | ay before operation        |                     |
| NA      | NA              | NA               | NA              | NA  | NA                | NA                | NA   | 0          | NA            | NA                         |                     |
| 1       | occasionally    | 1                | 0               | 1   | 6, 7              | 1                 | 0    | 1          | pN1 (2/18),   | Lc                         | single sample       |
| NA      | NA              | NA               | NA              | NA  | NA                | NA                | NA   | 0          | NA            | NA                         |                     |
| 0       | -               | 1                | 1               | 1   | NA                | 1                 | 0    | 1          | IV            | single sample              |                     |
| 1       | daily           | 1                | 1               | 1   | NA                | 1                 | 0    | -1         | I1(lym)       | L0V0Pn1                    | ay before operation |
| NA      | NA              | NA               | NA              | NA  | NA                | NA                | NA   | 0          | NA            | NA                         |                     |
| 0       | NA              | 1                | 0               | 0   | NA                | 1                 | 0    | 1          | N1L0V0Pn1     | Gay before operation       |                     |
| 1       | daily           | 0                | 0               | 0   | NA                | 0                 | 0    | -1         | NA            | ay before operation        |                     |
| 1       | consumption sir | 1                | 0               | 1   | 2, 5, 6, 7        | 1                 | 1    | -1         | III           | single sample              |                     |
| NA      | NA              | NA               | NA              | NA  | NA                | NA                | NA   | 0          | NA            | NA                         |                     |
| 0       | NA              | 1                | 0               | 0   | NA                | 1                 | 0    | 1          | N2L0V0Pn1     | Gay before operation       |                     |
| 0       | NA              | 1                | 0               | 0   | NA                | 1, 4              | 1    | 1          | NA            | adjuvant radiochemotherapy |                     |
| 0       | -               | 1                | 0               | 1   | 2, 4, 5, 7        | 6                 | 1    | -1         | IA            | single sample              |                     |
| 0       | -               | 1                | 1               | 0   | 2, 6, 2007        | 6                 | 0    | 1          | III           | single sample              |                     |
| 0       | NA              | 1                | 0               | 0   | NA                | 1, 3              | 1    | 1          | NA            | ay before operation        |                     |
| NA      | NA              | NA               | NA              | NA  | NA                | NA                | NA   | 0          | NA            | NA                         |                     |
| NA      | NA              | NA               | NA              | NA  | NA                | NA                | NA   | 0          | NA            | NA                         |                     |
| 0       | NA              | 1                | 1               | 1   | NA                | 1                 | 1    | 1          | N0L0V0Pn1     | Gay before operation       |                     |
| 0       | NA              | 1                | 0               | 1   | NA                | 1                 | 1    | 1          | NA            | ay before operation        |                     |
| 0       | NA              | 1                | 0               | 0   | NA                | 1                 | 0    | -1         | NA            | ay before operation        |                     |
| 0       | NA              | 1                | 0               | 1   | NA                | 1                 | 1    | 1          | N0L0V0Pn1     | Gay before operation       |                     |
| 0       | NA              | 0                | 0               | 0   | NA                | 0                 | 0    | 1          | N2L0V0Pn1     | Gay before operation       |                     |
| NA      | NA              | NA               | NA              | NA  | NA                | NA                | NA   | 0          | NA            | NA                         |                     |
| 1       | daily           | 1                | 0               | 0   | NA                | 1                 | 0    | 1          | N1L0V0Pn1     | Gay before operation       |                     |
| 1       | daily           | 1                | 1               | 1   | NA                | 1                 | 1    | 1          | NA            | ay before operation        |                     |
| 0       | NA              | 1                | 0               | 0   | NA                | 1                 | 0    | -1         | N0L0V0Pn0     | Gay before operation       |                     |
| NA      | NA              | NA               | NA              | NA  | NA                | NA                | NA   | 0          | NA            | NA                         |                     |
| 1       | 1 per week      | 1                | 0               | 0   | NA                | 1                 | 0    | 1          | N1L0V0Pn1     | Gay before operation       |                     |
| 0       | NA              | 1                | 0               | 1   | NA                | 1                 | 0    | 1          | N0L0V1Pn1     | Gay before operation       |                     |
| NA      | NA              | NA               | NA              | NA  | NA                | NA                | NA   | 0          | NA            | NA                         |                     |
| 0       | NA              | 1                | 0               | 0   | NA                | 1                 | 0    | 1          | NA            | ay before operation        |                     |
| 1       | daily           | 1                | 0               | 1   | NA                | 3                 | 0    | 1          | NA            | adjuvant chemotherapy      |                     |
| 0       | NA              | 1                | 0               | 0   | NA                | 1                 | 0    | -1         | N2L1V0Pn1     | Gay before operation       |                     |
| NA      | NA              | NA               | NA              | NA  | NA                | NA                | NA   | 0          | NA            | NA                         |                     |
| 0       | -               | 1                | 1               | 0   | 1, 2, 3, 5, 7     | 1                 | 1    | 1          | Ib            | single sample              |                     |
| 1       | 1 per week      | 0                | 1               | 0   | NA                | 0                 | 0    | -1         | NA            | ay before operation        |                     |
| NA      | NA              | NA               | NA              | NA  | NA                | NA                | NA   | 0          | NA            | NA                         |                     |
| 1       | 1 per month     | 1                | 0               | 0   | NA                | 2                 | 0    | -1         | NA            | ay before operation        |                     |
| 0       | NA              | 1                | 0               | 0   | NA                | 1                 | 0    | 1          | N1L0V0Pn1     | Gay before operation       |                     |
| NA      | NA              | NA               | NA              | NA  | NA                | NA                | NA   | 0          | NA            | NA                         |                     |
| 1       | alcohol since 2 | 1                | 0               | 1   | 2, 5, 2007        | 5                 | 1    | 1          | 1 (1/12), L1, | V                          | single sample       |
| NA      | NA              | NA               | NA              | NA  | NA                | NA                | NA   | 0          | NA            | NA                         |                     |
| 1       | 1 per month     | 1                | 0               | 0   | NA                | 1                 | 0    | 1          | N2L1V0Pn1     | Gay before operation       |                     |
| NA      | NA              | NA               | NA              | NA  | NA                | NA                | NA   | 0          | NA            | NA                         |                     |
| 0       | NA              | 1                | 0               | 1   | NA                | 1                 | 0    | 1          | NA            | ay before operation        |                     |
| 0       | NA              | 1                | 0               | 0   | NA                | 5                 | 0    | 1          | N2L0V1Pn1     | Gay before operation       |                     |
| NA      | NA              | NA               | NA              | NA  | NA                | NA                | NA   | 0          | NA            | NA                         |                     |
| NA      | NA              | NA               | NA              | NA  | NA                | NA                | NA   | 0          | NA            | NA                         |                     |
| 1       | daily           | 1                | 1               | 0   | NA                | 1                 | 0    | 1          | N2L1V0Pn1     | Gay before operation       |                     |
| NA      | NA              | NA               | NA              | NA  | NA                | NA                | NA   | 0          | NA            | NA                         |                     |
| 0       | -               | 1                | 0               | 1   | 1, 7              | 1, 6              | 0    | -1         | III           | single sample              |                     |
| 1       | lay in the last | 1                | 0               | 1   | 1, 7              | 1                 | 1    | 1          | IIA           | single sample              |                     |

Supplementary Table S4

| Meta variable        | Stool    |             |           | Saliva   |             |       |
|----------------------|----------|-------------|-----------|----------|-------------|-------|
|                      | Sum sq   | p value     | adj p     | Sum sq   | p value     | adj p |
| abmedication         | 7,40E+08 | 0.434882370 | 1.0       | 7,26E+07 | 0.726039062 | 1.0   |
| Age                  | 5,57E+10 | 0.348999552 | 1.0       | 1,43E+10 | 0.992133250 | 1.0   |
| Alcohol consumption  | 3,28E+09 | 0.105017752 | 1.0       | 4,22E+07 | 0.796587916 | 1.0   |
| Acid regurgitation   | 1,92E+09 | 0.215874045 | 1.0       | 2,05E+07 | 0.857472013 | 1.0   |
| Diabetes             | 1,47E+07 | 0.914256854 | 1.0       | 4,78E+08 | 0.387311299 | 1.0   |
| Heart burn           | 7,20E+08 | 0.445550072 | 1.0       | 2,11E+09 | 0.059764110 | 1.0   |
| High blood pressure  | 8,65E+06 | 0.934099012 | 1.0       | 4,70E+06 | 0.931832163 | 1.0   |
| Rheumatoid arthritis | 7,36E+08 | 0.444113445 | 1.0       | 3,28E+07 | 0.821293457 | 1.0   |
| Antibiotic           | 6,18E+07 | 0.825159237 | 1.0       | 3,55E+08 | 0.455050912 | 1.0   |
| Aspirin/paracetamol  | 1,36E+09 | 0.297843618 | 1.0       | 1,12E+09 | 0.181428572 | 1.0   |
| Asthma               | 1,76E+09 | 0.236597169 | 1.0       | 4,57E+08 | 0.395506158 | 1.0   |
| Center               | 4,90E+09 | 0.046953480 | 1.0       | 2,76E+06 | 0.947458361 | 1.0   |
| Cholesterol          | 1,72E+09 | 0.246154381 | 1.0       | 2,93E+08 | 0.493014836 | 1.0   |
| Cholmedication       | 6,33E+05 | 0.982226159 | 1.0       | 1,48E+08 | 0.663216095 | 1.0   |
| Corticosteroids      | 2,24E+09 | 0.179684582 | 1.0       | 4,11E+08 | 0.406201881 | 1.0   |
| cpy1                 | 7,16E+10 | 0.825078663 | 1.0       | 2,39E+10 | 0.800141666 | 1.0   |
| Bilirubin direct     | 1,32E+11 | 0.543089087 | 1.0       | 5,08E+10 | 0.857634747 | 1.0   |
| Bilirubin lab        | 1,30E+11 | 0.455465155 | 1.0       | 4,85E+10 | 0.802784617 | 1.0   |
| FHPDAC               | 2,40E+06 | 0.964420558 | 1.0       | 4,78E+08 | 0.383616587 | 1.0   |
| Gender               | 1,04E+09 | 0.362627665 | 1.0       | 5,98E+08 | 0.330808453 | 1.0   |
| Jaundice             | 9,45E+09 | 0.004406831 | 0.3437328 | 4,30E+08 | 0.412200163 | 1.0   |
| Jaundice imputed     | 8,32E+09 | 0.009192609 | 0.7078309 | 4,41E+08 | 0.403644362 | 1.0   |
| Library_size         | 8,15E+09 | 0.086373435 | 1.0       | 1,55E+09 | 0.487294778 | 1.0   |
| Metformin usage      | 3,98E+09 | 0.205930855 | 1.0       | 3,12E+08 | 0.783170829 | 1.0   |
| Obesity              | 8,37E+08 | 0.415414037 | 1.0       | 3,49E+08 | 0.450252695 | 1.0   |
| Paracetamol          | 4,49E+09 | 0.058802839 | 1.0       | 2,03E+09 | 0.072918539 | 1.0   |
| Periodontitis        | 1,73E+08 | 0.710712567 | 1.0       | 1,31E+09 | 0.136666489 | 1.0   |
| Probiotic            | 1,11E+07 | 0.925379621 | 1.0       | 1,09E+07 | 0.894062783 | 1.0   |
| Receding gums        | 8,17E+08 | 0.415025012 | 1.0       | 2,69E+08 | 0.508708572 | 1.0   |
| Salicylic acid       | 1,85E+09 | 0.227061461 | 1.0       | 1,94E+08 | 0.582723500 | 1.0   |
| Salicylic acid       | 1,85E+09 | 0.227061461 | 1.0       | 1,94E+08 | 0.582723500 | 1.0   |
| Smoking              | 9,62E+07 | 0.782721018 | 1.0       | 2,24E+09 | 0.059311754 | 1.0   |
| Direct Bilirubin     | 2,75E+09 | 0.138132461 | 1.0       | 1,71E+09 | 0.102796407 | 1.0   |
| Total Bilirubin      | 7,13E+08 | 0.440177205 | 1.0       | 2,87E+09 | 0.031822359 | 1.0   |

**Supplementary Table S5**

| Meta variable        | Stool          |         | Saliva         |         |
|----------------------|----------------|---------|----------------|---------|
|                      | R2 Bray-Curtis | p value | R2 Bray-Curtis | p value |
| status               | 0.023120267    | 0.0001  | 0.010468749    | 0.6507  |
| center               | 0.011138008    | 0.2069  | 0.016751291    | 0.1285  |
| age                  | 0.013765355    | 0.0320  | 0.018667727    | 0.0680  |
| gender               | 0.010546251    | 0.2884  | 0.017940759    | 0.0884  |
| jaundice_imp         | 0.015980165    | 0.0087  | 0.007371362    | 0.9560  |
| diabetes             | 0.013610607    | 0.0396  | 0.008990599    | 0.8264  |
| obesity              | 0.008734297    | 0.6915  | 0.016455787    | 0.1449  |
| smoking              | 0.008943945    | 0.6466  | 0.015490596    | 0.1926  |
| alcohol_con          | 0.009730450    | 0.4545  | 0.017867998    | 0.0929  |
| periodontitis        | 0.009018863    | 0.6237  | 0.009449706    | 0.7709  |
| cholesterol          | 0.007848892    | 0.8750  | 0.010637989    | 0.6368  |
| metformin            | 0.008315828    | 0.7739  | 0.018288711    | 0.0898  |
| salicylic            | 0.009192529    | 0.5749  | 0.008768629    | 0.8462  |
| antibiotic           | 0.007858670    | 0.8685  | 0.006825246    | 0.9740  |
| aspirin/paracetamol  | 0.012544261    | 0.0847  | 0.020375695    | 0.0432  |
| corticosteroids      | 0.010196054    | 0.3492  | 0.017140805    | 0.1277  |
| asthma               | 0.008577892    | 0.7244  | 0.014670641    | 0.2412  |
| acid regurgitation   | 0.011797158    | 0.1335  | 0.006447749    | 0.9801  |
| rheumatoid arthritis | 0.008798014    | 0.6747  | 0.011646596    | 0.5123  |
| probiotic            | 0.009681840    | 0.4578  | 0.011088990    | 0.5759  |
| paracetamol          | 0.010198223    | 0.3573  | 0.009887242    | 0.7242  |
| heartburn            | 0.008810470    | 0.6760  | 0.013602585    | 0.3241  |
| high blood pressure  | 0.007920655    | 0.8614  | 0.010496978    | 0.6491  |
| receding gums        | 0.008765518    | 0.6873  | 0.007806693    | 0.9229  |
| FHPDAC               | 0.010506425    | 0.2887  | 0.012944276    | 0.3752  |
| acid med             | 0.010032433    | 0.3870  | 0.007517951    | 0.9390  |

Supplementary Table S6

| Study            | Diagnosis | Cohort siz | Pred.pos | Pred.neg | FPR  | Model   | Accession number |
|------------------|-----------|------------|----------|----------|------|---------|------------------|
| Average BRCA     | BRCA      | 62         |          |          | 0,35 | Model 1 |                  |
| Average BRCA     | BRCA      | 62         |          |          | 0,05 | Model 2 |                  |
| Average CD       | CD        | 340        |          |          | 0,35 | Model 1 |                  |
| Average CD       | CD        | 340        |          |          | 0,05 | Model 2 |                  |
| Average CRC      | CRC       | 679        |          |          | 0,25 | Model 1 |                  |
| Average CRC      | CRC       | 679        |          |          | 0,04 | Model 2 |                  |
| Average CTR      | CTR       | 3872       |          |          | 0,17 | Model 1 |                  |
| Average CTR      | CTR       | 3872       |          |          | 0,01 | Model 2 |                  |
| Average LD       | LD        | 237        |          |          | 0,26 | Model 1 |                  |
| Average LD       | LD        | 237        |          |          | 0,07 | Model 2 |                  |
| Average T1D      | T1D       | 87         |          |          | 0,29 | Model 1 |                  |
| Average T1D      | T1D       | 87         |          |          | 0,00 | Model 2 |                  |
| Average T2D      | T2D       | 382        |          |          | 0,23 | Model 1 |                  |
| Average T2D      | T2D       | 382        |          |          | 0,02 | Model 2 |                  |
| Average UC       | UC        | 352        |          |          | 0,18 | Model 1 |                  |
| Average UC       | UC        | 352        |          |          | 0,01 | Model 2 |                  |
| Buschart 2016    | CTR       | 26         | 5        | 21       | 0,19 | Model 1 |                  |
| Buschart 2016    | T1D       | 27         | 8        | 19       | 0,30 | Model 1 | PRJNA289586      |
| Buschart 2016    | CTR       | 26         | 0        | 26       | 0,00 | Model 2 |                  |
| Buschart 2016    | T1D       | 27         | 0        | 27       | 0,00 | Model 2 |                  |
| Dhakan 2019      | CTR       | 110        | 19       | 91       | 0,17 | Model 1 | PRJNA397112      |
| Dhakan 2019      | CTR       | 110        | 2        | 108      | 0,02 | Model 2 |                  |
| Feng 2015        | CTR       | 63         | 7        | 56       | 0,11 | Model 1 |                  |
| Feng 2015        | CRC       | 93         | 11       | 82       | 0,12 | Model 1 | PRJEB7774        |
| Feng 2015        | CTR       | 63         | 2        | 61       | 0,03 | Model 2 |                  |
| Feng 2015        | CRC       | 93         | 2        | 91       | 0,02 | Model 2 |                  |
| FijiCOMP         | CTR       | 172        | 14       | 158      | 0,08 | Model 1 | PRJNA217052      |
| FijiCOMP         | CTR       | 172        | 1        | 171      | 0,01 | Model 2 |                  |
| FMT Vaughn       | CD        | 15         | 4        | 11       | 0,27 | Model 1 | PRJNA321058      |
| FMT Vaughn       | CD        | 15         | 1        | 14       | 0,07 | Model 2 |                  |
| Franzosa 2018    | CTR       | 56         | 5        | 51       | 0,09 | Model 1 |                  |
| Franzosa 2018    | UC        | 76         | 10       | 66       | 0,13 | Model 1 |                  |
| Franzosa 2018    | CD        | 88         | 19       | 69       | 0,22 | Model 1 | PRJNA400072      |
| Franzosa 2018    | CTR       | 56         | 0        | 56       | 0,00 | Model 2 |                  |
| Franzosa 2018    | UC        | 76         | 0        | 76       | 0,00 | Model 2 |                  |
| Franzosa 2018    | CD        | 88         | 2        | 86       | 0,02 | Model 2 |                  |
| He 2017          | CTR       | 54         | 11       | 43       | 0,20 | Model 1 |                  |
| He 2017          | CD        | 49         | 33       | 16       | 0,67 | Model 1 | PRJEB15371       |
| He 2017          | CTR       | 54         | 0        | 54       | 0,00 | Model 2 |                  |
| He 2017          | CD        | 49         | 5        | 44       | 0,10 | Model 2 |                  |
| Price-Lloyd 2019 | UC        | 84         | 26       | 58       | 0,31 | Model 1 |                  |
| Price-Lloyd 2019 | CD        | 151        | 38       | 113      | 0,25 | Model 1 |                  |
| Price-Lloyd 2019 | CTR       | 65         | 5        | 60       | 0,08 | Model 1 | PRJNA398089      |
| Price-Lloyd 2019 | UC        | 84         | 1        | 83       | 0,01 | Model 2 |                  |
| Price-Lloyd 2019 | CD        | 151        | 2        | 149      | 0,01 | Model 2 |                  |
| Price-Lloyd 2019 | CTR       | 65         | 0        | 65       | 0,00 | Model 2 |                  |

|                       |     |     |    |     |      |         |                     |
|-----------------------|-----|-----|----|-----|------|---------|---------------------|
| Hoyles 2018           | LD  | 73  | 3  | 70  | 0,04 | Model 1 | PRJEB14215          |
| Hoyles 2018           | LD  | 73  | 3  | 70  | 0,04 | Model 2 |                     |
| Karlsson 2013         | CTR | 43  | 8  | 35  | 0,19 | Model 1 | PRJEB1786           |
| Karlsson 2013         | T2D | 102 | 14 | 88  | 0,14 | Model 1 |                     |
| Karlsson 2013         | CTR | 43  | 0  | 43  | 0,00 | Model 2 |                     |
| Karlsson 2013         | T2D | 102 | 0  | 102 | 0,00 | Model 2 |                     |
| Kuang 2019            | CTR | 59  | 18 | 41  | 0,31 | Model 1 | PRJEB18755          |
| Kuang 2019            | T1D | 29  | 9  | 20  | 0,31 | Model 1 |                     |
| Kuang 2019            | CTR | 59  | 0  | 59  | 0,00 | Model 2 |                     |
| Kuang 2019            | T1D | 29  | 0  | 29  | 0,00 | Model 2 |                     |
| Liu 2016              | CTR | 110 | 5  | 105 | 0,05 | Model 1 | PRJNA328899         |
| Liu 2016              | CTR | 110 | 0  | 110 | 0,00 | Model 2 |                     |
| Mardinoglu 2018       | LD  | 48  | 4  | 44  | 0,08 | Model 1 | PRJNA420817         |
| Mardinoglu 2018       | LD  | 48  | 0  | 48  | 0,00 | Model 2 |                     |
| Forslund 2015         | CTR | 372 | 85 | 287 | 0,23 | Model 1 | 224, PRJEB1220, PRJ |
| Forslund 2015         | T2D | 78  | 16 | 62  | 0,21 | Model 1 |                     |
| Forslund 2015         | T1D | 31  | 8  | 23  | 0,26 | Model 1 |                     |
| Forslund 2015         | UC  | 192 | 20 | 172 | 0,10 | Model 1 |                     |
| Forslund 2015         | CD  | 37  | 13 | 24  | 0,35 | Model 1 |                     |
| Forslund 2015         | CTR | 372 | 0  | 372 | 0,00 | Model 2 |                     |
| Forslund 2015         | T2D | 78  | 0  | 78  | 0,00 | Model 2 |                     |
| Forslund 2015         | T1D | 31  | 0  | 31  | 0,00 | Model 2 |                     |
| Forslund 2015         | UC  | 192 | 1  | 191 | 0,01 | Model 2 |                     |
| Forslund 2015         | CD  | 37  | 1  | 36  | 0,03 | Model 2 |                     |
| Qin 2012              | CTR | 185 | 51 | 134 | 0,28 | Model 1 |                     |
| Qin 2012              | T2D | 183 | 76 | 107 | 0,42 | Model 1 |                     |
| Qin 2012              | CTR | 185 | 1  | 184 | 0,01 | Model 2 |                     |
| Qin 2012              | T2D | 183 | 2  | 181 | 0,01 | Model 2 |                     |
| Qin 2014              | LD  | 116 | 77 | 39  | 0,66 | Model 1 | PRJEB6337           |
| Qin 2014              | CTR | 114 | 25 | 89  | 0,22 | Model 1 |                     |
| Qin 2014              | LD  | 116 | 20 | 96  | 0,17 | Model 2 |                     |
| Qin 2014              | CTR | 114 | 1  | 113 | 0,01 | Model 2 |                     |
| Sankaranarayanan 2015 | T2D | 19  | 3  | 16  | 0,16 | Model 1 | PRJNA299502         |
| Sankaranarayanan 2015 | T2D | 19  | 1  | 18  | 0,05 | Model 2 |                     |
| Schirmer 2016         | CTR | 471 | 14 | 457 | 0,03 | Model 1 | PRJNA319574         |
| Schirmer 2016         | CTR | 471 | 0  | 471 | 0,00 | Model 2 |                     |
| Spanish               | CP  | 29  | 4  | 25  | 0,14 | Model 1 |                     |
| Spanish               | CP  | 29  | 5  | 24  | 0,17 | Model 2 |                     |
| Vogtmann 2016         | CRC | 51  | 13 | 38  | 0,25 | Model 1 | PRJEB12449          |
| Vogtmann 2016         | CTR | 52  | 11 | 41  | 0,21 | Model 1 |                     |
| Vogtmann 2016         | CRC | 51  | 0  | 51  | 0,00 | Model 2 |                     |
| Vogtmann 2016         | CTR | 52  | 2  | 50  | 0,04 | Model 2 |                     |
| Wirbel 2019           | CRC | 60  | 12 | 48  | 0,20 | Model 1 | ERP005534 PRJEB27   |
| Wirbel 2019           | CTR | 60  | 4  | 56  | 0,07 | Model 1 |                     |
| Wirbel 2019           | CRC | 60  | 1  | 59  | 0,02 | Model 2 |                     |
| Wirbel 2019           | CTR | 60  | 0  | 60  | 0,00 | Model 2 |                     |
| Xie 2016              | CTR | 250 | 35 | 215 | 0,14 | Model 1 | PRJEB9576           |
| Xie 2016              | CTR | 250 | 2  | 248 | 0,01 | Model 2 |                     |

|              |      |     |    |     |      |         |                    |
|--------------|------|-----|----|-----|------|---------|--------------------|
| Yachida 2019 | CRC  | 352 | 88 | 264 | 0,25 | Model 1 |                    |
| Yachida 2019 | CTR  | 289 | 76 | 213 | 0,26 | Model 1 |                    |
| Yachida 2019 | CRC  | 352 | 28 | 324 | 0,08 | Model 2 | PRJDB4176          |
| Yachida 2019 | CTR  | 289 | 8  | 281 | 0,03 | Model 2 |                    |
| Yassour 2018 | CTR  | 42  | 3  | 39  | 0,07 | Model 1 |                    |
| Yassour 2018 | CTR  | 42  | 0  | 42  | 0,00 | Model 2 | PRJNA290381        |
| Yu 2017      | CRC  | 74  | 25 | 49  | 0,34 | Model 1 |                    |
| Yu 2017      | CTR  | 54  | 14 | 40  | 0,26 | Model 1 |                    |
| Yu 2017      | CRC  | 74  | 2  | 72  | 0,03 | Model 2 | PRJEB10878         |
| Yu 2017      | CTR  | 54  | 0  | 54  | 0,00 | Model 2 |                    |
| Zeevi 2015   | CTR  | 900 | 81 | 819 | 0,09 | Model 1 |                    |
| Zeevi 2015   | CTR  | 900 | 1  | 899 | 0,00 | Model 2 | PRJEB11532         |
| Zeller 2014  | CTR  | 83  | 10 | 73  | 0,12 | Model 1 |                    |
| Zeller 2014  | CRC  | 49  | 18 | 31  | 0,37 | Model 1 |                    |
| Zeller 2014  | CTR  | 83  | 4  | 79  | 0,05 | Model 2 | PRJEB6070, PRJEB26 |
| Zeller 2014  | CRC  | 49  | 5  | 44  | 0,10 | Model 2 |                    |
| Zhu 2018     | BRCA | 62  | 22 | 40  | 0,35 | Model 1 |                    |
| Zhu 2018     | CTR  | 71  | 25 | 46  | 0,35 | Model 1 |                    |
| Zhu 2018     | BRCA | 62  | 3  | 59  | 0,05 | Model 2 | PRJNA453965        |
| Zhu 2018     | CTR  | 71  | 0  | 71  | 0,00 | Model 2 |                    |

**Supplementary Table S7**

| Target species/genus        | Sequence                     | Probe    | Dye  | Reference                                                                                                                                                       |
|-----------------------------|------------------------------|----------|------|-----------------------------------------------------------------------------------------------------------------------------------------------------------------|
| Bifidobacterium (genus)     | 5'- GATAGGACGCGACCCCAT -3'   | Bif228   | Cy3  | <a href="http://probase.csb.univie.ac.at/pb_report/probe/3959">http://probase.csb.univie.ac.at/pb_report/probe/3959</a>                                         |
| Veillonella (genus)         | 5'- AGACGCAATCCCCTCCTT -3'   | Veil223  | FITC | <a href="http://probase.csb.univie.ac.at/pb_report/probe/553">http://probase.csb.univie.ac.at/pb_report/probe/553</a>                                           |
| Akkermansia (genus/species) | 5'- CCTTGCGGTTGGCTTCAGAT -3' | MUC-1437 | FITC | <a href="http://probase.csb.univie.ac.at/pb_report/probe/3898">http://probase.csb.univie.ac.at/pb_report/probe/3898</a>                                         |
| Lactobacillus (genus)       | 5'- ACATGGAGTTCCACT -3'      | Lact663  | FITC | <a href="https://repositorium.sdum.uminho.pt/bitstream/1822/24334/1/pp.pdf">https://repositorium.sdum.uminho.pt/bitstream/1822/24334/1/pp.pdf</a>               |
| Bacteroides (genus)         | 5'- CCAATGTGGGGGACCTT -3'    | Bac303   | Cy3  | <a href="https://onlinelibrary.wiley.com/doi/pdf/10.1111/j.1365-2672.2011.05039.x">https://onlinelibrary.wiley.com/doi/pdf/10.1111/j.1365-2672.2011.05039.x</a> |
| Streptococcus (genus)       | 5'-TTTAGCCGTCCCTTTCTGG -3'   | Strc493  | Cy3  | <a href="http://probase.csb.univie.ac.at/pb_report/probe/964">http://probase.csb.univie.ac.at/pb_report/probe/964</a>                                           |
